# Supplementary material for: Transcriptional analysis of long non-coding RNAs in facet joint osteoarthritis
Source: Royal Society of Chemistry journal article supplement (doi:10.1039/c8ra04809f), 2018-01-01
Supplement: c8ra04809f2.xlsx [file c8ra04809f2.xlsx]

## Sheet: Table S2 CTRL-VS-FJOA.DiffExpTr
LncRNAID	GeneName	Locus	CTRL_FPKM	FJOA_FPKM	log2(FJOA/CTRL)	up-or-down	p_value	q_value	LncRNAGeneID
TCONS_00045791	-	chr14:21712360-21712741	104.558	0	#NAME?	down	5e-05	0.00109431	XLOC_030524
TCONS_00130647	-	chr5:91484799-91485000	87.8474	0	#NAME?	down	0.0016	0.0139126	XLOC_086316
TCONS_00113614	-	chr3:189505508-189505713	85.2557	0	#NAME?	down	0.0022	0.0139126	XLOC_073826
TCONS_00088309	-	chr2:128837149-128837348	83.3576	0	#NAME?	down	5e-05	0.00109431	XLOC_056381
TCONS_00108665	-	chr3:25127728-25127927	81.3317	0	#NAME?	down	0.00255	0.0139126	XLOC_070170
TCONS_00135588	-	chr5:123342227-123342430	80.4664	0	#NAME?	down	0.0016	0.0139126	XLOC_089811
TCONS_00133225	-	chr5:6201207-6201406	80.1286	0	#NAME?	down	0.00245	0.0139126	XLOC_088041
TCONS_00151861	-	chr7:45784516-45784716	77.732	0	#NAME?	down	0.00255	0.0139126	XLOC_100362
TCONS_00126859	-	chr4:121799502-121799703	73.6272	0	#NAME?	down	0.00245	0.0139126	XLOC_083411
TCONS_00172684	-	chr9:99395260-99395462	71.1182	0	#NAME?	down	0.00255	0.0139126	XLOC_114984
TCONS_00126930	-	chr4:127006321-127006526	68.2045	0	#NAME?	down	0.0026	0.0139126	XLOC_083461
TCONS_00128762	-	chr5:9598191-9598398	68.0063	0	#NAME?	down	0.0016	0.0139126	XLOC_084912
TCONS_00173550	-	chr9:121554661-121554868	68.0063	0	#NAME?	down	0.0016	0.0139126	XLOC_115689
TCONS_00130080	-	chr5:77004597-77004796	67.7281	0	#NAME?	down	0.00185	0.0139126	XLOC_085840
TCONS_00017913	-	chr10:79331651-79331853	66.4754	0	#NAME?	down	0.00205	0.0139126	XLOC_011617
TCONS_00165654	-	chr8:115363205-115363404	65.9882	0	#NAME?	down	0.0022	0.0139126	XLOC_110051
TCONS_00037592	-	chr12:6745088-6745292	65.225	0	#NAME?	down	0.00255	0.0139126	XLOC_024751
TCONS_00113787	-	chr3:196666473-196666680	62.775	0	#NAME?	down	0.0026	0.0139126	XLOC_073949
TCONS_00008329	-	chr1:5817939-5818145	62.629	0	#NAME?	down	5e-05	0.00109431	XLOC_005264
TCONS_00013436	-	chr1:164367676-164367877	62.2543	0	#NAME?	down	0.00185	0.0139126	XLOC_008432
TCONS_00181319	-	chrX:154237645-154237863	61.7799	0	#NAME?	down	0.00015	0.00279523	XLOC_120892
TCONS_00127097	-	chr4:137586295-137586498	61.752	0	#NAME?	down	0.00215	0.0139126	XLOC_083617
TCONS_00140560	-	chr6:114403963-114404170	61.24	0	#NAME?	down	5e-05	0.00109431	XLOC_093051
TCONS_00098522	-	chr20:12042627-12042834	60.946	0	#NAME?	down	0.00245	0.0139126	XLOC_063636
TCONS_00129834	-	chr5:67177585-67177786	60.6342	0	#NAME?	down	0.0022	0.0139126	XLOC_085693
TCONS_00019320	-	chr10:123377464-123377664	59.9223	0	#NAME?	down	0.0016	0.0139126	XLOC_012553
TCONS_00018216	-	chr10:89981346-89981548	59.7304	0	#NAME?	down	0.00185	0.0139126	XLOC_011806
TCONS_00086535	-	chr2:65764725-65764939	59.6657	0	#NAME?	down	0.0022	0.0139126	XLOC_055151
TCONS_00092245	-	chr2:30006442-30006651	59.339	0	#NAME?	down	5e-05	0.00109431	XLOC_059100
TCONS_00100708	-	chr20:17928534-17928734	58.7214	0	#NAME?	down	0.00165	0.0139126	XLOC_065045
TCONS_00154465	-	chr7:142392208-142392410	58.166	0	#NAME?	down	0.0022	0.0139126	XLOC_102109
TCONS_00098256	-	chr20:4217686-4217890	57.4429	0	#NAME?	down	0.00225	0.0139126	XLOC_063429
TCONS_00080464	-	chr19:34834939-34835138	57.3084	0	#NAME?	down	0.0028	0.0139126	XLOC_052257
TCONS_00013134	-	chr1:158203479-158203678	57.3084	0	#NAME?	down	0.0028	0.0139126	XLOC_008245
TCONS_00181307	-	chrX:154004428-154004633	56.9954	0	#NAME?	down	0.00215	0.0139126	XLOC_120887
TCONS_00112386	-	chr3:149231524-149231731	56.4847	0	#NAME?	down	0.00285	0.0140291	XLOC_072879
TCONS_00092545	-	chr2:43172124-43172325	56.3032	0	#NAME?	down	0.00165	0.0139126	XLOC_059302
TCONS_00025622	-	chr11:67811910-67812122	55.7925	0	#NAME?	down	0.0016	0.0139126	XLOC_016663
TCONS_00093212	-	chr2:61857259-61857464	55.1925	0	#NAME?	down	0.00225	0.0139126	XLOC_059872
TCONS_00139406	-	chr6:44776762-44776964	55.1358	0	#NAME?	down	0.0016	0.0139126	XLOC_092204
TCONS_00137557	-	chr6:383157-383357	54.9288	0	#NAME?	down	0.0028	0.0139126	XLOC_091056
TCONS_00009995	-	chr1:47129190-47129390	54.2043	0	#NAME?	down	0.0027	0.0139126	XLOC_006236
TCONS_00163095	-	chr8:6798153-6798353	54.2043	0	#NAME?	down	0.0027	0.0139126	XLOC_108255
TCONS_00163910	-	chr8:37850836-37851040	53.6134	0	#NAME?	down	0.0022	0.0139126	XLOC_108838
TCONS_00103580	-	chr21:22915090-22915299	53.081	0	#NAME?	down	0.00255	0.0139126	XLOC_066961
TCONS_00066423	-	chr17:49903268-49903471	52.9302	0	#NAME?	down	0.0016	0.0139126	XLOC_043947
TCONS_00151878	-	chr7:46150598-46150799	52.6767	0	#NAME?	down	0.0028	0.0139126	XLOC_100379
TCONS_00167331	-	chr9:27937356-27937577	52.4286	0	#NAME?	down	0.00275	0.0139126	XLOC_111212
TCONS_00015224	-	chr1:229131936-229132135	52.0985	0	#NAME?	down	0.0025	0.0139126	XLOC_009685
TCONS_00073505	-	chr18:7448564-7448765	51.9722	0	#NAME?	down	0.0027	0.0139126	XLOC_048153
TCONS_00101336	-	chr20:40813102-40813316	51.7102	0	#NAME?	down	0.0016	0.0139126	XLOC_065415
TCONS_00117975	-	chr3:146776153-146776367	51.7102	0	#NAME?	down	0.0016	0.0139126	XLOC_076891
TCONS_00002798	-	chr1:62902967-62903172	51.513	0	#NAME?	down	0.0022	0.0139126	XLOC_001749
TCONS_00101649	-	chr20:49101801-49102008	51.0334	0	#NAME?	down	0.00225	0.0139126	XLOC_065624
TCONS_00082156	-	chr19:56340412-56340622	51.0211	0	#NAME?	down	0.00255	0.0139126	XLOC_053095
TCONS_00036422	-	chr12:102744850-102745052	50.5411	0	#NAME?	down	0.0028	0.0139126	XLOC_024053
TCONS_00033940	-	chr12:25433878-25434078	49.9353	0	#NAME?	down	0.0025	0.0139126	XLOC_022266
TCONS_00140309	-	chr6:105994844-105995049	49.8377	0	#NAME?	down	0.002	0.0139126	XLOC_092875
TCONS_00147421	-	chr6:169978940-169979140	49.6873	0	#NAME?	down	0.0024	0.0139126	XLOC_097980
TCONS_00086123	-	chr2:49601156-49601356	49.6873	0	#NAME?	down	0.0024	0.0139126	XLOC_054830
TCONS_00173170	-	chr9:111170025-111170225	49.6873	0	#NAME?	down	0.0024	0.0139126	XLOC_115427
TCONS_00010280	-	chr1:56137766-56137966	49.6873	0	#NAME?	down	0.0024	0.0139126	XLOC_006389
TCONS_00025486	-	chr11:66420408-66420608	49.6873	0	#NAME?	down	0.0024	0.0139126	XLOC_016607
TCONS_00162042	-	chr8:96393695-96393895	49.6873	0	#NAME?	down	0.0024	0.0139126	XLOC_107484
TCONS_00128192	-	chr4:176991494-176991694	49.6873	0	#NAME?	down	0.0024	0.0139126	XLOC_084494
TCONS_00065775	-	chr17:38750140-38750346	49.5201	0	#NAME?	down	0.0022	0.0139126	XLOC_043577
TCONS_00068676	-	chr17:18087556-18087763	49.4602	0	#NAME?	down	0.0022	0.0139126	XLOC_045285
TCONS_00171059	-	chr9:32852832-32853043	49.067	0	#NAME?	down	0.00255	0.0139126	XLOC_113793
TCONS_00160406	-	chr8:28624854-28625061	48.9534	0	#NAME?	down	0.00185	0.0139126	XLOC_106223
TCONS_00086433	-	chr2:64370242-64370460	48.0511	0	#NAME?	down	0.0021	0.0139126	XLOC_055059
TCONS_00031470	-	chr11:109739339-109739551	47.9726	0	#NAME?	down	0.00245	0.0139126	XLOC_020552
TCONS_00015535	-	chr1:243118690-243118891	47.8879	0	#NAME?	down	0.0025	0.0139126	XLOC_009902
TCONS_00008956	-	chr1:23618589-23618790	47.8879	0	#NAME?	down	0.0025	0.0139126	XLOC_005629
TCONS_00140078	-	chr6:84824371-84824574	47.8542	0	#NAME?	down	0.0027	0.0139126	XLOC_092697
TCONS_00017439	-	chr10:63978510-63978713	47.8542	0	#NAME?	down	0.0027	0.0139126	XLOC_011307
TCONS_00059084	-	chr16:24838015-24838218	47.8542	0	#NAME?	down	0.0027	0.0139126	XLOC_039413
TCONS_00060612	-	chr16:78050916-78051117	47.6411	0	#NAME?	down	0.0024	0.0139126	XLOC_040303
TCONS_00161042	-	chr8:60653184-60653385	47.6411	0	#NAME?	down	0.0024	0.0139126	XLOC_106681
TCONS_00094909	-	chr2:127248458-127248678	47.0045	0	#NAME?	down	0.00015	0.00279523	XLOC_061049
TCONS_00132157	-	chr5:148920502-148920708	46.9718	0	#NAME?	down	0.0016	0.0139126	XLOC_087364
TCONS_00056231	-	chr15:61713401-61713605	46.6003	0	#NAME?	down	0.0028	0.0139126	XLOC_037734
TCONS_00072541	-	chr18:35546925-35547129	46.6003	0	#NAME?	down	0.0028	0.0139126	XLOC_047484
TCONS_00046099	-	chr14:27007457-27007661	46.6003	0	#NAME?	down	0.0028	0.0139126	XLOC_030683
TCONS_00103709	-	chr21:28357731-28357950	46.4001	0	#NAME?	down	5e-05	0.00109431	XLOC_067064
TCONS_00097403	-	chr2:226043409-226043615	45.983	0	#NAME?	down	0.00165	0.0139126	XLOC_062791
TCONS_00154286	-	chr7:136163748-136163952	45.9543	0	#NAME?	down	0.0027	0.0139126	XLOC_101992
TCONS_00052483	-	chr15:30890730-30890934	45.9543	0	#NAME?	down	0.0027	0.0139126	XLOC_035175
TCONS_00179999	-	chrX:79349521-79349729	45.8378	0	#NAME?	down	0.0022	0.0139126	XLOC_120033
TCONS_00014716	-	chr1:215315971-215316179	45.8378	0	#NAME?	down	0.0022	0.0139126	XLOC_009304
TCONS_00074596	-	chr18:67385730-67385941	45.3875	0	#NAME?	down	0.00215	0.0139126	XLOC_048937
TCONS_00125940	-	chr4:83209027-83209240	45.2464	0	#NAME?	down	0.00285	0.0140291	XLOC_082729
TCONS_00101801	-	chr20:52027542-52027773	44.8729	0	#NAME?	down	5e-05	0.00109431	XLOC_065704
TCONS_00172786	-	chr9:105693221-105693439	44.6188	0	#NAME?	down	0.0016	0.0139126	XLOC_115074
TCONS_00034355	-	chr12:46273209-46273425	44.3083	0	#NAME?	down	0.0026	0.0139126	XLOC_022546
TCONS_00088726	-	chr2:154557242-154557447	44.154	0	#NAME?	down	0.0027	0.0139126	XLOC_056669
TCONS_00062048	-	chr16:22190755-22190981	44.15	0	#NAME?	down	0.00275	0.0139126	XLOC_041149
TCONS_00172733	-	chr9:104332550-104332753	44.1085	0	#NAME?	down	0.0025	0.0139126	XLOC_115021
TCONS_00103276	-	chr21:45736269-45736472	43.8663	0	#NAME?	down	0.0024	0.0139126	XLOC_066731
TCONS_00010676	-	chr1:74686281-74686484	43.8663	0	#NAME?	down	0.0024	0.0139126	XLOC_006708
TCONS_00047206	-	chr14:59096425-59096631	43.0574	0	#NAME?	down	0.0028	0.0139126	XLOC_031591
TCONS_00178287	-	chrX:9785132-9785338	43.0574	0	#NAME?	down	0.0028	0.0139126	XLOC_118837
TCONS_00070507	-	chr17:64312161-64312367	43.0574	0	#NAME?	down	0.0028	0.0139126	XLOC_046332
TCONS_00049833	-	chr14:48772151-48772361	42.5142	0	#NAME?	down	0.0022	0.0139126	XLOC_033361
TCONS_00031472	-	chr11:109861040-109861246	42.4458	0	#NAME?	down	0.0027	0.0139126	XLOC_020554
TCONS_00154444	-	chr7:141916229-141916433	42.3639	0	#NAME?	down	0.0025	0.0139126	XLOC_102093
TCONS_00053678	-	chr15:69557058-69557262	42.3639	0	#NAME?	down	0.0025	0.0139126	XLOC_035966
TCONS_00002338	-	chr1:48482265-48482477	42.3288	0	#NAME?	down	0.00225	0.0139126	XLOC_001394
TCONS_00165153	-	chr8:92827053-92827265	42.3288	0	#NAME?	down	0.00225	0.0139126	XLOC_109724
TCONS_00144612	-	chr6:69837787-69837991	42.1248	0	#NAME?	down	0.0024	0.0139126	XLOC_095892
TCONS_00098597	-	chr20:13204656-13204865	41.8863	0	#NAME?	down	0.0016	0.0139126	XLOC_063708
TCONS_00120314	-	chr4:16355519-16355735	41.6257	0	#NAME?	down	0.00245	0.0139126	XLOC_078549
TCONS_00156724	-	chr7:66029886-66030093	41.4221	0	#NAME?	down	0.0028	0.0139126	XLOC_103655
TCONS_00044932	-	chr13:76580644-76580862	41.1866	0	#NAME?	down	0.0026	0.0139126	XLOC_029843
TCONS_00095318	-	chr2:143845203-143845412	40.9809	0	#NAME?	down	0.00165	0.0139126	XLOC_061344
TCONS_00046805	-	chr14:53173376-53173585	40.9809	0	#NAME?	down	0.00165	0.0139126	XLOC_031257
TCONS_00136764	-	chr5:157459453-157459664	40.9742	0	#NAME?	down	0.0022	0.0139126	XLOC_090562
TCONS_00095359	-	chr2:147530865-147531076	40.9742	0	#NAME?	down	0.0022	0.0139126	XLOC_061370
TCONS_00153723	-	chr7:108583400-108583605	40.711	0	#NAME?	down	0.0025	0.0139126	XLOC_101631
TCONS_00117915	-	chr3:145965860-145966065	40.711	0	#NAME?	down	0.0025	0.0139126	XLOC_076850
TCONS_00135029	-	chr5:101429005-101429210	40.711	0	#NAME?	down	0.0025	0.0139126	XLOC_089335
TCONS_00030718	-	chr11:81150626-81150842	40.6159	0	#NAME?	down	0.00255	0.0139126	XLOC_020017
TCONS_00145822	-	chr6:112048976-112049192	40.6159	0	#NAME?	down	0.00255	0.0139126	XLOC_096799
TCONS_00140697	-	chr6:119533212-119533422	40.3576	0	#NAME?	down	0.0016	0.0139126	XLOC_093163
TCONS_00180546	-	chrX:123940677-123940896	39.73	0	#NAME?	down	0.0026	0.0139126	XLOC_120367
TCONS_00134351	-	chr5:72427910-72428129	39.73	0	#NAME?	down	0.0026	0.0139126	XLOC_088855
TCONS_00017899	-	chr10:78402633-78402843	39.4775	0	#NAME?	down	0.00165	0.0139126	XLOC_011604
TCONS_00042822	-	chr13:80534649-80534859	39.4775	0	#NAME?	down	0.00165	0.0139126	XLOC_028269
TCONS_00067542	-	chr17:81489691-81489899	39.2896	0	#NAME?	down	0.0027	0.0139126	XLOC_044611
TCONS_00079780	-	chr19:16316078-16316286	39.2896	0	#NAME?	down	0.0027	0.0139126	XLOC_051802
TCONS_00002195	-	chr1:45491461-45491669	39.2896	0	#NAME?	down	0.0027	0.0139126	XLOC_001305
TCONS_00098476	-	chr20:10941533-10941741	39.2896	0	#NAME?	down	0.0027	0.0139126	XLOC_063601
TCONS_00121523	-	chr4:77498603-77498811	39.2896	0	#NAME?	down	0.0027	0.0139126	XLOC_079454
TCONS_00040145	-	chr12:91973285-91973492	39.2535	0	#NAME?	down	0.0028	0.0139126	XLOC_026413
TCONS_00080347	-	chr19:31149008-31149224	39.1771	0	#NAME?	down	0.00205	0.0139126	XLOC_052160
TCONS_00161659	-	chr8:80933352-80933558	39.1431	0	#NAME?	down	0.0025	0.0139126	XLOC_107189
TCONS_00067685	-	chr17:139978-140184	39.1431	0	#NAME?	down	0.0025	0.0139126	XLOC_044697
TCONS_00097410	-	chr2:226191838-226192044	39.1431	0	#NAME?	down	0.0025	0.0139126	XLOC_062798
TCONS_00155457	-	chr7:17253478-17253684	38.9087	0	#NAME?	down	0.0024	0.0139126	XLOC_102760
TCONS_00123471	-	chr4:164977947-164978153	38.9087	0	#NAME?	down	0.0024	0.0139126	XLOC_080898
TCONS_00054875	-	chr15:20366194-20366405	38.9036	0	#NAME?	down	0.0016	0.0139126	XLOC_036793
TCONS_00017911	-	chr10:79324885-79325096	38.9036	0	#NAME?	down	0.0016	0.0139126	XLOC_011615
TCONS_00140563	-	chr6:115775624-115775833	38.3958	0	#NAME?	down	0.0028	0.0139126	XLOC_093054
TCONS_00096654	-	chr2:198743080-198743289	38.3958	0	#NAME?	down	0.0028	0.0139126	XLOC_062298
TCONS_00057392	-	chr15:89657433-89657658	38.3315	0	#NAME?	down	5e-05	0.00109431	XLOC_038449
TCONS_00140881	-	chr6:120158434-120158647	38.1085	0	#NAME?	down	0.0022	0.0139126	XLOC_093342
TCONS_00116940	-	chr3:111034579-111034790	38.0474	0	#NAME?	down	0.00165	0.0139126	XLOC_076232
TCONS_00064042	-	chr16:87804440-87804677	37.968	0	#NAME?	down	5e-05	0.00109431	XLOC_042574
TCONS_00102072	-	chr20:63580228-63580445	37.9585	0	#NAME?	down	0.0027	0.0139126	XLOC_065866
TCONS_00133117	-	chr5:854591-854808	37.8459	0	#NAME?	down	0.00205	0.0139126	XLOC_087957
TCONS_00122463	-	chr4:120321972-120322181	37.8285	0	#NAME?	down	0.0027	0.0139126	XLOC_080163
TCONS_00145886	-	chr6:116678063-116678272	37.8285	0	#NAME?	down	0.0027	0.0139126	XLOC_096844
TCONS_00117415	-	chr3:127857065-127857283	37.7544	0	#NAME?	down	0.00255	0.0139126	XLOC_076498
TCONS_00011098	-	chr1:88512859-88513066	37.6565	0	#NAME?	down	0.0025	0.0139126	XLOC_007036
TCONS_00110957	-	chr3:107425192-107425399	37.6565	0	#NAME?	down	0.0025	0.0139126	XLOC_071794
TCONS_00137400	-	chr5:127959603-127959810	37.6565	0	#NAME?	down	0.0025	0.0139126	XLOC_090986
TCONS_00075373	-	chr19:9821553-9821765	37.5176	0	#NAME?	down	0.0016	0.0139126	XLOC_049368
TCONS_00034557	-	chr12:49213692-49213916	37.484	0	#NAME?	down	0.0001	0.00197988	XLOC_022719
TCONS_00015221	-	chr1:229124670-229124877	37.4245	0	#NAME?	down	0.0024	0.0139126	XLOC_009682
TCONS_00153015	-	chr7:88630083-88630290	37.4245	0	#NAME?	down	0.0024	0.0139126	XLOC_101174
TCONS_00126460	-	chr4:105142835-105143042	37.4245	0	#NAME?	down	0.0024	0.0139126	XLOC_083104
TCONS_00130224	-	chr5:82325881-82326088	37.4245	0	#NAME?	down	0.0024	0.0139126	XLOC_085923
TCONS_00001052	-	chr1:23671670-23671893	37.3954	0	#NAME?	down	0.0016	0.0139126	XLOC_000648
TCONS_00142893	-	chr6:19551280-19551503	37.3954	0	#NAME?	down	0.0016	0.0139126	XLOC_094818
TCONS_00003245	-	chr1:82012405-82012626	37.0084	0	#NAME?	down	0.0026	0.0139126	XLOC_002053
TCONS_00042841	-	chr13:80616534-80616744	36.9945	0	#NAME?	down	0.0028	0.0139126	XLOC_028288
TCONS_00103719	-	chr21:28385284-28385498	36.7724	0	#NAME?	down	0.0022	0.0139126	XLOC_067074
TCONS_00124839	-	chr4:22169316-22169532	36.7285	0	#NAME?	down	0.00225	0.0139126	XLOC_081961
TCONS_00094760	-	chr2:113822820-113823860	36.7284	0	#NAME?	down	0.00215	0.0139126	XLOC_060933
TCONS_00056227	-	chr15:61680331-61680543	36.6849	0	#NAME?	down	0.00165	0.0139126	XLOC_037730
TCONS_00139472	-	chr6:45701292-45701504	36.6849	0	#NAME?	down	0.00165	0.0139126	XLOC_092263
TCONS_00146388	-	chr6:134671036-134671248	36.6849	0	#NAME?	down	0.00165	0.0139126	XLOC_097219
TCONS_00170792	-	chr9:8206709-8206921	36.6849	0	#NAME?	down	0.00165	0.0139126	XLOC_113626
TCONS_00047477	-	chr14:65846279-65846497	36.5721	0	#NAME?	down	0.00205	0.0139126	XLOC_031790
TCONS_00051404	-	chr14:98951644-98951854	36.4407	0	#NAME?	down	0.0027	0.0139126	XLOC_034408
TCONS_00025960	-	chr11:75236924-75237134	36.4407	0	#NAME?	down	0.0027	0.0139126	XLOC_016853
TCONS_00011543	-	chr1:107537853-107538072	36.4192	0	#NAME?	down	0.00255	0.0139126	XLOC_007343
TCONS_00029241	-	chr11:34851466-34851686	36.3217	0	#NAME?	down	0.00245	0.0139126	XLOC_019162
TCONS_00178617	-	chrX:20918670-20918878	36.246	0	#NAME?	down	0.0025	0.0139126	XLOC_119058
TCONS_00099905	-	chr20:60351439-60351652	36.1971	0	#NAME?	down	0.0016	0.0139126	XLOC_064521
TCONS_00040431	-	chr12:98356098-98356306	36.0154	0	#NAME?	down	0.0024	0.0139126	XLOC_026644
TCONS_00145953	-	chr6:118785770-118785991	35.8006	0	#NAME?	down	0.00135	0.0139126	XLOC_096899
TCONS_00127266	-	chr4:139484038-139484260	35.7359	0	#NAME?	down	0.0026	0.0139126	XLOC_083771
TCONS_00155440	-	chr7:17010466-17010677	35.6616	0	#NAME?	down	0.0028	0.0139126	XLOC_102743
TCONS_00038756	-	chr12:50031820-50033146	35.6132	0	#NAME?	down	5e-05	0.00109431	XLOC_025478
TCONS_00066592	-	chr17:55815412-55815627	35.4973	0	#NAME?	down	0.0022	0.0139126	XLOC_044035
TCONS_00162405	-	chr8:121804258-121804471	35.3865	0	#NAME?	down	0.00165	0.0139126	XLOC_107749
TCONS_00108393	-	chr3:16143150-16143366	35.2966	0	#NAME?	down	0.00185	0.0139126	XLOC_069926
TCONS_00130607	-	chr5:89327482-89327702	35.1433	0	#NAME?	down	0.00255	0.0139126	XLOC_086281
TCONS_00051190	-	chr14:91756019-91756239	35.1433	0	#NAME?	down	0.00255	0.0139126	XLOC_034307
TCONS_00091697	-	chr2:8537487-8537698	35.1207	0	#NAME?	down	0.0027	0.0139126	XLOC_058750
TCONS_00129281	-	chr5:41281976-41282187	35.1207	0	#NAME?	down	0.0027	0.0139126	XLOC_085328
TCONS_00175301	-	chrX:38980909-38981120	35.1207	0	#NAME?	down	0.0027	0.0139126	XLOC_116816
TCONS_00063801	-	chr16:81993463-81993674	35.1207	0	#NAME?	down	0.0027	0.0139126	XLOC_042403
TCONS_00084785	-	chr2:5998838-5999052	34.9357	0	#NAME?	down	0.0016	0.0139126	XLOC_053842
TCONS_00132464	-	chr5:158202953-158203162	34.9053	0	#NAME?	down	0.0025	0.0139126	XLOC_087559
TCONS_00092269	-	chr2:31735329-31735538	34.9053	0	#NAME?	down	0.0025	0.0139126	XLOC_059119
TCONS_00018133	-	chr10:88166446-88166674	34.6853	0	#NAME?	down	5e-05	0.00109431	XLOC_011747
TCONS_00096510	-	chr2:190704940-190705149	34.6761	0	#NAME?	down	0.0024	0.0139126	XLOC_062188
TCONS_00163355	-	chr8:17493478-17493687	34.6761	0	#NAME?	down	0.0024	0.0139126	XLOC_108447
TCONS_00073002	-	chr18:64028913-64029136	34.5188	0	#NAME?	down	0.0026	0.0139126	XLOC_047790
TCONS_00126508	-	chr4:107362238-107362450	34.3911	0	#NAME?	down	0.0028	0.0139126	XLOC_083137
TCONS_00100303	-	chr20:1742078-1742297	34.3542	0	#NAME?	down	0.00135	0.0139126	XLOC_064770
TCONS_00162570	-	chr8:126862969-126863187	34.2863	0	#NAME?	down	0.00225	0.0139126	XLOC_107884
TCONS_00059564	-	chr16:31429666-31429882	34.28	0	#NAME?	down	0.0022	0.0139126	XLOC_039681
TCONS_00020677	-	chr10:45076727-45076941	34.1458	0	#NAME?	down	0.00165	0.0139126	XLOC_013431
TCONS_00006929	-	chr1:212166915-212167145	34.1088	0	#NAME?	down	0.0022	0.0139126	XLOC_004376
TCONS_00173443	-	chr9:120323098-120323319	33.9244	0	#NAME?	down	0.00255	0.0139126	XLOC_115617
TCONS_00131278	-	chr5:122289442-122289654	33.863	0	#NAME?	down	0.0027	0.0139126	XLOC_086820
TCONS_00104181	-	chr21:35744846-35745058	33.863	0	#NAME?	down	0.0027	0.0139126	XLOC_067448
TCONS_00041705	-	chr13:22279636-22279848	33.863	0	#NAME?	down	0.0027	0.0139126	XLOC_027439
TCONS_00086211	-	chr2:56406712-56406924	33.863	0	#NAME?	down	0.0027	0.0139126	XLOC_054888
TCONS_00153104	-	chr7:91275598-91275808	33.6313	0	#NAME?	down	0.0025	0.0139126	XLOC_101237
TCONS_00128421	-	chr4:189761835-189762045	33.6313	0	#NAME?	down	0.0025	0.0139126	XLOC_084648
TCONS_00096962	-	chr2:208931994-208932204	33.404	0	#NAME?	down	0.0024	0.0139126	XLOC_062508
TCONS_00030745	-	chr11:82810381-82810591	33.404	0	#NAME?	down	0.0024	0.0139126	XLOC_020044
TCONS_00170841	-	chr9:14515102-14515326	33.3533	0	#NAME?	down	0.0026	0.0139126	XLOC_113650
TCONS_00098620	-	chr20:13672430-13672654	33.3533	0	#NAME?	down	0.0026	0.0139126	XLOC_063727
TCONS_00073640	-	chr18:14940440-14940660	33.1998	0	#NAME?	down	0.00215	0.0139126	XLOC_048253
TCONS_00031812	-	chr11:118872754-118872967	33.1807	0	#NAME?	down	0.0028	0.0139126	XLOC_020768
TCONS_00147295	-	chr6:166361357-166361574	33.1152	0	#NAME?	down	0.0022	0.0139126	XLOC_097891
TCONS_00167462	-	chr9:34803155-34803372	33.1152	0	#NAME?	down	0.0022	0.0139126	XLOC_111301
TCONS_00120169	-	chr4:10742958-10743175	33.1152	0	#NAME?	down	0.0022	0.0139126	XLOC_078436
TCONS_00146571	-	chr6:141664031-141664249	32.9646	0	#NAME?	down	0.00185	0.0139126	XLOC_097339
TCONS_00092597	-	chr2:45152147-45152362	32.9617	0	#NAME?	down	0.00165	0.0139126	XLOC_059334
TCONS_00178921	-	chrX:43755181-43755394	32.6644	0	#NAME?	down	0.0027	0.0139126	XLOC_119297
TCONS_00094669	-	chr2:111720612-111720825	32.6644	0	#NAME?	down	0.0027	0.0139126	XLOC_060876
TCONS_00089558	-	chr2:181938406-181938622	32.5814	0	#NAME?	down	0.0016	0.0139126	XLOC_057284
TCONS_00056655	-	chr15:70797601-70797812	32.4196	0	#NAME?	down	0.0025	0.0139126	XLOC_038022
TCONS_00013903	-	chr1:181993846-181994071	32.2362	0	#NAME?	down	0.0026	0.0139126	XLOC_008759
TCONS_00174222	-	chr9:136987027-136987252	32.2362	0	#NAME?	down	0.0026	0.0139126	XLOC_116037
TCONS_00144472	-	chr6:55407544-55407755	32.194	0	#NAME?	down	0.0024	0.0139126	XLOC_095799
TCONS_00116194	-	chr3:67206188-67206399	32.194	0	#NAME?	down	0.0024	0.0139126	XLOC_075603
TCONS_00051321	-	chr14:94424655-94424875	32.0486	0	#NAME?	down	0.00225	0.0139126	XLOC_034362
TCONS_00092265	-	chr2:31628987-31629201	32.0244	0	#NAME?	down	0.0028	0.0139126	XLOC_059115
TCONS_00111034	-	chr3:111421543-111421757	32.0244	0	#NAME?	down	0.0028	0.0139126	XLOC_071849
TCONS_00065919	-	chr17:40652166-40652384	32.0006	0	#NAME?	down	0.0022	0.0139126	XLOC_043664
TCONS_00110609	-	chr3:87162126-87162345	31.8732	0	#NAME?	down	0.00185	0.0139126	XLOC_071530
TCONS_00051622	-	chr14:103315988-103316204	31.8314	0	#NAME?	down	0.00165	0.0139126	XLOC_034573
TCONS_00155947	-	chr7:31681011-31681227	31.8314	0	#NAME?	down	0.00165	0.0139126	XLOC_103126
TCONS_00139552	-	chr6:53113140-53113356	31.8314	0	#NAME?	down	0.00165	0.0139126	XLOC_092311
TCONS_00015048	-	chr1:226029269-226029492	31.6423	0	#NAME?	down	0.00255	0.0139126	XLOC_009553
TCONS_00062948	-	chr16:66086220-66086443	31.6423	0	#NAME?	down	0.00255	0.0139126	XLOC_041792
TCONS_00177640	-	chrX:141405851-141406065	31.5192	0	#NAME?	down	0.0027	0.0139126	XLOC_118436
TCONS_00084890	-	chr2:7409060-7409274	31.5192	0	#NAME?	down	0.0027	0.0139126	XLOC_053944
TCONS_00095642	-	chr2:160238548-160238762	31.5192	0	#NAME?	down	0.0027	0.0139126	XLOC_061557
TCONS_00158909	-	chr7:142935791-142936005	31.5192	0	#NAME?	down	0.0027	0.0139126	XLOC_105146
TCONS_00155686	-	chr7:23080783-23081000	31.4815	0	#NAME?	down	0.0016	0.0139126	XLOC_102957
TCONS_00100844	-	chr20:24818243-24818460	31.4815	0	#NAME?	down	0.0016	0.0139126	XLOC_065141
TCONS_00129845	-	chr5:67501212-67501424	31.2646	0	#NAME?	down	0.0025	0.0139126	XLOC_085704
TCONS_00126501	-	chr4:107065050-107065262	31.2646	0	#NAME?	down	0.0025	0.0139126	XLOC_083130
TCONS_00035675	-	chr12:76606627-76606853	31.1647	0	#NAME?	down	0.0026	0.0139126	XLOC_023445
TCONS_00061893	-	chr16:17074003-17074225	31.091	0	#NAME?	down	0.00215	0.0139126	XLOC_041046
TCONS_00049958	-	chr14:52247659-52247871	31.0411	0	#NAME?	down	0.0024	0.0139126	XLOC_033440
TCONS_00114552	-	chr3:14284773-14284985	31.0411	0	#NAME?	down	0.0024	0.0139126	XLOC_074576
TCONS_00151078	-	chr7:21965941-21966153	31.0411	0	#NAME?	down	0.0024	0.0139126	XLOC_099825
TCONS_00116061	-	chr3:63792404-63792616	31.0411	0	#NAME?	down	0.0024	0.0139126	XLOC_075494
TCONS_00159197	-	chr7:150154495-150154707	31.0411	0	#NAME?	down	0.0024	0.0139126	XLOC_105381
TCONS_00045008	-	chr13:76780201-76780413	31.0411	0	#NAME?	down	0.0024	0.0139126	XLOC_029919
TCONS_00180634	-	chrX:128849100-128849312	31.0411	0	#NAME?	down	0.0024	0.0139126	XLOC_120450
TCONS_00056572	-	chr15:69973380-69973601	31.0003	0	#NAME?	down	0.00225	0.0139126	XLOC_037954
TCONS_00086574	-	chr2:67436689-67436904	30.9205	0	#NAME?	down	0.0028	0.0139126	XLOC_055184
TCONS_00124302	-	chr4:6905429-6905644	30.9205	0	#NAME?	down	0.0028	0.0139126	XLOC_081524
TCONS_00025953	-	chr11:75100603-75100818	30.6451	0	#NAME?	down	0.0025	0.0139126	XLOC_016848
TCONS_00090595	-	chr2:216549799-216550023	30.5738	0	#NAME?	down	0.00255	0.0139126	XLOC_058047
TCONS_00178774	-	chrX:36734103-36734321	30.4289	0	#NAME?	down	0.0016	0.0139126	XLOC_119174
TCONS_00108432	-	chr3:18534526-18534744	30.4289	0	#NAME?	down	0.0016	0.0139126	XLOC_069958
TCONS_00019810	-	chr10:7115509-7115727	30.4289	0	#NAME?	down	0.0016	0.0139126	XLOC_012896
TCONS_00022541	-	chr10:117383118-117383333	30.4262	0	#NAME?	down	0.0027	0.0139126	XLOC_014641
TCONS_00063936	-	chr16:86833645-86833873	30.3137	0	#NAME?	down	0.00155	0.0139126	XLOC_042488
TCONS_00154475	-	chr7:142720681-142721048	30.2141	0	#NAME?	down	0.0021	0.0139126	XLOC_102119
TCONS_00036205	-	chr12:94076827-94077066	30.2041	0	#NAME?	down	0.0014	0.0139126	XLOC_023920
TCONS_00003113	-	chr1:74832866-74833079	30.1643	0	#NAME?	down	0.0025	0.0139126	XLOC_001968
TCONS_00008511	-	chr1:9146825-9147052	30.1361	0	#NAME?	down	0.0026	0.0139126	XLOC_005375
TCONS_00159151	-	chr7:149976619-149976832	29.9424	0	#NAME?	down	0.0024	0.0139126	XLOC_105335
TCONS_00115829	-	chr3:52067275-52067488	29.9424	0	#NAME?	down	0.0024	0.0139126	XLOC_075369
TCONS_00065159	-	chr17:19464075-19464291	29.8663	0	#NAME?	down	0.0028	0.0139126	XLOC_043195
TCONS_00095952	-	chr2:175013965-175014181	29.8663	0	#NAME?	down	0.0028	0.0139126	XLOC_061772
TCONS_00017472	-	chr10:64425004-64425239	29.7835	0	#NAME?	down	0.00075	0.012243	XLOC_011340
TCONS_00007625	-	chr1:233714683-233714901	29.7148	0	#NAME?	down	0.00165	0.0139126	XLOC_004810
TCONS_00047104	-	chr14:56556819-56557037	29.7148	0	#NAME?	down	0.00165	0.0139126	XLOC_031517
TCONS_00094908	-	chr2:127247747-127247972	29.5499	0	#NAME?	down	0.00255	0.0139126	XLOC_061048
TCONS_00024371	-	chr11:28547540-28547765	29.5499	0	#NAME?	down	0.00255	0.0139126	XLOC_015972
TCONS_00053948	-	chr15:75163009-75163228	29.4214	0	#NAME?	down	0.0016	0.0139126	XLOC_036151
TCONS_00093134	-	chr2:59672823-59673042	29.4214	0	#NAME?	down	0.0016	0.0139126	XLOC_059806
TCONS_00073560	-	chr18:10630126-10630345	29.4214	0	#NAME?	down	0.0016	0.0139126	XLOC_048201
TCONS_00011089	-	chr1:88363539-88363755	29.3828	0	#NAME?	down	0.0027	0.0139126	XLOC_007027
TCONS_00080179	-	chr19:22619599-22623956	29.3828	0	#NAME?	down	0.0027	0.0139126	XLOC_052039
TCONS_00132709	-	chr5:173180868-173181093	29.0474	0	#NAME?	down	0.00205	0.0139126	XLOC_087723
TCONS_00089257	-	chr2:172294259-172294480	28.9336	0	#NAME?	down	0.0022	0.0139126	XLOC_057073
TCONS_00125714	-	chr4:81421217-81421431	28.8926	0	#NAME?	down	0.0024	0.0139126	XLOC_082545
TCONS_00092607	-	chr2:45351317-45351531	28.8926	0	#NAME?	down	0.0024	0.0139126	XLOC_059342
TCONS_00126455	-	chr4:104970823-104971037	28.8926	0	#NAME?	down	0.0024	0.0139126	XLOC_083099
TCONS_00157254	-	chr7:87500116-87500350	28.8906	0	#NAME?	down	5e-05	0.00109431	XLOC_104041
TCONS_00031519	-	chr11:111042633-111042852	28.7239	0	#NAME?	down	0.00165	0.0139126	XLOC_020589
TCONS_00114292	-	chr3:8656062-8656281	28.7239	0	#NAME?	down	0.00165	0.0139126	XLOC_074383
TCONS_00097590	-	chr2:230137869-230138088	28.7239	0	#NAME?	down	0.00165	0.0139126	XLOC_062957
TCONS_00181902	-	chrY:11176361-11176592	28.6124	0	#NAME?	down	0.0016	0.0139126	XLOC_121290
TCONS_00166751	-	chr9:2227228-2227454	28.5676	0	#NAME?	down	0.00255	0.0139126	XLOC_110752
TCONS_00041718	-	chr13:23468156-23468373	28.3844	0	#NAME?	down	0.0027	0.0139126	XLOC_027451
TCONS_00096607	-	chr2:196961611-196961828	28.3844	0	#NAME?	down	0.0027	0.0139126	XLOC_062269
TCONS_00072427	-	chr18:26753229-26753446	28.3844	0	#NAME?	down	0.0027	0.0139126	XLOC_047417
TCONS_00002435	-	chr1:52558499-52558716	28.3844	0	#NAME?	down	0.0027	0.0139126	XLOC_001469
TCONS_00052350	-	chr15:25644701-25644925	28.1157	0	#NAME?	down	0.00225	0.0139126	XLOC_035080
TCONS_00146117	-	chr6:127085975-127086190	28.1095	0	#NAME?	down	0.0025	0.0139126	XLOC_097027
TCONS_00005848	-	chr1:177466012-177466227	28.1095	0	#NAME?	down	0.0025	0.0139126	XLOC_003655
TCONS_00160565	-	chr8:34318995-34319218	27.9522	0	#NAME?	down	0.00185	0.0139126	XLOC_106338
TCONS_00133354	-	chr5:10671704-10671927	27.9522	0	#NAME?	down	0.00185	0.0139126	XLOC_088145
TCONS_00135283	-	chr5:110736146-110736364	27.8931	0	#NAME?	down	0.0028	0.0139126	XLOC_089565
TCONS_00134281	-	chr5:68420507-68420725	27.8931	0	#NAME?	down	0.0028	0.0139126	XLOC_088810
TCONS_00134285	-	chr5:68919438-68919656	27.8931	0	#NAME?	down	0.0028	0.0139126	XLOC_088814
TCONS_00021649	-	chr10:88127575-88127790	27.8907	0	#NAME?	down	0.0024	0.0139126	XLOC_014088
TCONS_00181787	-	chrY:20902647-20902862	27.8907	0	#NAME?	down	0.0024	0.0139126	XLOC_121210
TCONS_00141554	-	chr6:147784930-147785150	27.7754	0	#NAME?	down	0.00165	0.0139126	XLOC_093837
TCONS_00107251	-	chr22:38944530-38944750	27.7754	0	#NAME?	down	0.00165	0.0139126	XLOC_069247
TCONS_00099678	-	chr20:55656516-55656736	27.7754	0	#NAME?	down	0.00165	0.0139126	XLOC_064396
TCONS_00117796	-	chr3:138890794-138891014	27.7754	0	#NAME?	down	0.00165	0.0139126	XLOC_076775
TCONS_00086114	-	chr2:48842467-48842688	27.5339	0	#NAME?	down	0.0016	0.0139126	XLOC_054821
TCONS_00085525	-	chr2:28359713-28359950	27.3054	0	#NAME?	down	0.0022	0.0139126	XLOC_054408
TCONS_00135058	-	chr5:101520917-101521146	27.2185	0	#NAME?	down	0.00245	0.0139126	XLOC_089364
TCONS_00024852	-	chr11:57619106-57619330	27.0718	0	#NAME?	down	0.00185	0.0139126	XLOC_016264
TCONS_00094403	-	chr2:104792935-104793151	26.9343	0	#NAME?	down	0.0024	0.0139126	XLOC_060686
TCONS_00087751	-	chr2:106988488-106988704	26.9343	0	#NAME?	down	0.0024	0.0139126	XLOC_056024
TCONS_00174666	-	chrX:7442654-7442870	26.9343	0	#NAME?	down	0.0024	0.0139126	XLOC_116342
TCONS_00036827	-	chr12:114726258-114726478	26.909	0	#NAME?	down	0.0025	0.0139126	XLOC_024327
TCONS_00174006	-	chr9:133234704-133234925	26.867	0	#NAME?	down	0.00165	0.0139126	XLOC_115931
TCONS_00117475	-	chr3:128676826-128677047	26.867	0	#NAME?	down	0.00165	0.0139126	XLOC_076553
TCONS_00101788	-	chr20:51962692-51962911	26.7566	0	#NAME?	down	0.00265	0.0139126	XLOC_065691
TCONS_00007606	-	chr1:233296400-233296628	26.7195	0	#NAME?	down	0.00255	0.0139126	XLOC_004796
TCONS_00004232	-	chr1:117673925-117674154	26.7127	0	#NAME?	down	0.00285	0.0140291	XLOC_002680
TCONS_00057078	-	chr15:80394394-80394616	26.6494	0	#NAME?	down	0.0016	0.0139126	XLOC_038251
TCONS_00116775	-	chr3:106779141-106779381	26.5845	0	#NAME?	down	0.0001	0.00197988	XLOC_076088
TCONS_00100848	-	chr20:24915764-24915987	26.5284	0	#NAME?	down	0.00215	0.0139126	XLOC_065145
TCONS_00070855	-	chr17:73131081-73131300	26.5144	0	#NAME?	down	0.0027	0.0139126	XLOC_046585
TCONS_00014846	-	chr1:222103175-222103394	26.5144	0	#NAME?	down	0.0027	0.0139126	XLOC_009393
TCONS_00074486	-	chr18:61069841-61070060	26.5144	0	#NAME?	down	0.0027	0.0139126	XLOC_048847
TCONS_00152014	-	chr7:55769993-55770212	26.5144	0	#NAME?	down	0.0027	0.0139126	XLOC_100451
TCONS_00161074	-	chr8:60986472-60986691	26.5144	0	#NAME?	down	0.0027	0.0139126	XLOC_106711
TCONS_00134172	-	chr5:61979329-61979566	26.4536	0	#NAME?	down	5e-05	0.00109431	XLOC_088722
TCONS_00022901	-	chr10:127905969-127906200	26.4115	0	#NAME?	down	0.0026	0.0139126	XLOC_014894
TCONS_00065414	-	chr17:30659401-30659625	26.3833	0	#NAME?	down	0.002	0.0139126	XLOC_043362
TCONS_00136760	-	chr5:157265353-157265570	26.2346	0	#NAME?	down	0.0025	0.0139126	XLOC_090558
TCONS_00094131	-	chr2:96163969-96164186	26.2346	0	#NAME?	down	0.0025	0.0139126	XLOC_060512
TCONS_00073811	-	chr18:30546511-30546731	26.0855	0	#NAME?	down	0.0028	0.0139126	XLOC_048377
TCONS_00020342	-	chr10:31193631-31193851	26.0855	0	#NAME?	down	0.0028	0.0139126	XLOC_013214
TCONS_00165995	-	chr8:129167877-129168097	26.0855	0	#NAME?	down	0.0028	0.0139126	XLOC_110321
TCONS_00054761	-	chr15:99807019-99807240	26.0289	0	#NAME?	down	0.0025	0.0139126	XLOC_036685
TCONS_00030611	-	chr11:76745664-76745881	26.0191	0	#NAME?	down	0.0024	0.0139126	XLOC_019953
TCONS_00088319	-	chr2:130315665-130315882	26.0191	0	#NAME?	down	0.0024	0.0139126	XLOC_056391
TCONS_00110256	-	chr3:73263657-73263874	26.0191	0	#NAME?	down	0.0024	0.0139126	XLOC_071204
TCONS_00090915	-	chr2:225678419-225678636	26.0191	0	#NAME?	down	0.0024	0.0139126	XLOC_058284
TCONS_00116186	-	chr3:66958417-66958634	26.0191	0	#NAME?	down	0.0024	0.0139126	XLOC_075595
TCONS_00015014	-	chr1:224863817-224864034	26.0191	0	#NAME?	down	0.0024	0.0139126	XLOC_009526
TCONS_00038272	-	chr12:30583295-30583512	26.0191	0	#NAME?	down	0.0024	0.0139126	XLOC_025173
TCONS_00094324	-	chr2:100561837-100562075	25.8749	0	#NAME?	down	0.00145	0.0139126	XLOC_060623
TCONS_00091845	-	chr2:14884332-14884561	25.8495	0	#NAME?	down	0.00255	0.0139126	XLOC_058844
TCONS_00074709	-	chr18:76343026-76343254	25.7005	0	#NAME?	down	0.00135	0.0139126	XLOC_049023
TCONS_00042247	-	chr13:44663399-44663619	25.6388	0	#NAME?	down	0.0027	0.0139126	XLOC_027837
TCONS_00014078	-	chr1:192930870-192931090	25.6388	0	#NAME?	down	0.0027	0.0139126	XLOC_008901
TCONS_00130328	-	chr5:82636017-82636237	25.6388	0	#NAME?	down	0.0027	0.0139126	XLOC_086025
TCONS_00057077	-	chr15:80374393-80374620	25.5632	0	#NAME?	down	0.00225	0.0139126	XLOC_038250
TCONS_00134472	-	chr5:76715577-76715805	25.5293	0	#NAME?	down	0.0018	0.0139126	XLOC_088927
TCONS_00111131	-	chr3:112668709-112668935	25.4143	0	#NAME?	down	0.00185	0.0139126	XLOC_071917
TCONS_00139979	-	chr6:81266037-81266261	25.272	0	#NAME?	down	0.002	0.0139126	XLOC_092616
TCONS_00085632	-	chr2:32354379-32354615	25.2642	0	#NAME?	down	0.0021	0.0139126	XLOC_054467
TCONS_00035614	-	chr12:71803687-71803908	25.2559	0	#NAME?	down	0.00225	0.0139126	XLOC_023399
TCONS_00029293	-	chr11:38971412-38971633	25.2394	0	#NAME?	down	0.0028	0.0139126	XLOC_019195
TCONS_00104266	-	chr21:37357520-37357741	25.2394	0	#NAME?	down	0.0028	0.0139126	XLOC_067501
TCONS_00109908	-	chr3:52041658-52041893	25.1837	0	#NAME?	down	0.0016	0.0139126	XLOC_071002
TCONS_00070259	-	chr17:56556429-56556652	25.165	0	#NAME?	down	0.00165	0.0139126	XLOC_046208
TCONS_00045088	-	chr13:80216537-80216755	25.1433	0	#NAME?	down	0.0024	0.0139126	XLOC_029977
TCONS_00037639	-	chr12:7722771-7722989	25.1433	0	#NAME?	down	0.0024	0.0139126	XLOC_024778
TCONS_00076742	-	chr19:37025485-37025730	25.1424	0	#NAME?	down	5e-05	0.00109431	XLOC_050168
TCONS_00163394	-	chr8:18401728-18401972	25.0739	0	#NAME?	down	0.00275	0.0139126	XLOC_108470
TCONS_00134663	-	chr5:87881738-87881968	25.0131	0	#NAME?	down	0.00255	0.0139126	XLOC_089062
TCONS_00139475	-	chr6:45816736-45816964	24.9602	0	#NAME?	down	0.0029	0.0142149	XLOC_092266
TCONS_00014812	-	chr1:221878067-221878296	24.9319	0	#NAME?	down	0.00215	0.0139126	XLOC_009360
TCONS_00142342	-	chr6:170025208-170025429	24.8003	0	#NAME?	down	0.0027	0.0139126	XLOC_094428
TCONS_00007947	-	chr1:247647829-247648050	24.8003	0	#NAME?	down	0.0027	0.0139126	XLOC_005053
TCONS_00059700	-	chr16:48720817-48721050	24.7648	0	#NAME?	down	0.0026	0.0139126	XLOC_039757
TCONS_00161209	-	chr8:69404922-69405160	24.7136	0	#NAME?	down	0.0021	0.0139126	XLOC_106797
TCONS_00063138	-	chr16:69396447-69396673	24.6234	0	#NAME?	down	0.0022	0.0139126	XLOC_041906
TCONS_00016599	-	chr10:27307618-27307844	24.6234	0	#NAME?	down	0.0022	0.0139126	XLOC_010696
TCONS_00166002	-	chr8:129264730-129264949	24.5178	0	#NAME?	down	0.0025	0.0139126	XLOC_110328
TCONS_00170332	-	chr9:134180360-134180579	24.5178	0	#NAME?	down	0.0025	0.0139126	XLOC_113326
TCONS_00117864	-	chr3:142297192-142297411	24.5178	0	#NAME?	down	0.0025	0.0139126	XLOC_076817
TCONS_00045245	-	chr13:97416660-97416897	24.5021	0	#NAME?	down	0.0014	0.0139126	XLOC_030105
TCONS_00170472	-	chr9:136938437-136938659	24.4286	0	#NAME?	down	0.0028	0.0139126	XLOC_113402
TCONS_00111026	-	chr3:111252851-111253073	24.4286	0	#NAME?	down	0.0028	0.0139126	XLOC_071841
TCONS_00116739	-	chr3:106639807-106640031	24.3669	0	#NAME?	down	0.00165	0.0139126	XLOC_076052
TCONS_00069063	-	chr17:34848801-34849025	24.3669	0	#NAME?	down	0.00165	0.0139126	XLOC_045518
TCONS_00061798	-	chr16:12598108-12598327	24.3048	0	#NAME?	down	0.0024	0.0139126	XLOC_040989
TCONS_00131667	-	chr5:135687737-135687956	24.3048	0	#NAME?	down	0.0024	0.0139126	XLOC_087093
TCONS_00152397	-	chr7:67404136-67404355	24.3048	0	#NAME?	down	0.0024	0.0139126	XLOC_100724
TCONS_00118405	-	chr3:151527287-151527512	24.2094	0	#NAME?	down	0.0016	0.0139126	XLOC_077273
TCONS_00015223	-	chr1:229129170-229129395	24.2094	0	#NAME?	down	0.0016	0.0139126	XLOC_009684
TCONS_00020455	-	chr10:33171465-33171690	24.2094	0	#NAME?	down	0.0016	0.0139126	XLOC_013299
TCONS_00170333	-	chr9:134317262-134317487	24.2094	0	#NAME?	down	0.0016	0.0139126	XLOC_113327
TCONS_00037220	-	chr12:131811694-131811927	24.0955	0	#NAME?	down	0.00245	0.0139126	XLOC_024541
TCONS_00142334	-	chr6:169845477-169845706	24.0163	0	#NAME?	down	0.00225	0.0139126	XLOC_094420
TCONS_00176578	-	chrX:76434244-76434473	24.0163	0	#NAME?	down	0.00225	0.0139126	XLOC_117746
TCONS_00162043	-	chr8:96401948-96402170	23.9978	0	#NAME?	down	0.0027	0.0139126	XLOC_107485
TCONS_00145647	-	chr6:106929567-106929789	23.9978	0	#NAME?	down	0.0027	0.0139126	XLOC_096703
TCONS_00056454	-	chr15:66269038-66269260	23.9978	0	#NAME?	down	0.0027	0.0139126	XLOC_037870
TCONS_00146095	-	chr6:126803863-126804097	23.9904	0	#NAME?	down	0.0026	0.0139126	XLOC_097005
TCONS_00040968	-	chr12:116688091-116688325	23.9904	0	#NAME?	down	0.0026	0.0139126	XLOC_026983
TCONS_00168745	-	chr9:94007042-94007281	23.9715	0	#NAME?	down	0.0021	0.0139126	XLOC_112265
TCONS_00028182	-	chr11:3447099-3447326	23.859	0	#NAME?	down	0.0022	0.0139126	XLOC_018409
TCONS_00010888	-	chr1:83444610-83444845	23.8341	0	#NAME?	down	0.00175	0.0139126	XLOC_006890
TCONS_00147459	-	chr6:169805126-169805346	23.7141	0	#NAME?	down	0.0025	0.0139126	XLOC_098013
TCONS_00161819	-	chr8:88817497-88817717	23.7141	0	#NAME?	down	0.0025	0.0139126	XLOC_107330
TCONS_00073001	-	chr18:64027699-64027919	23.7141	0	#NAME?	down	0.0025	0.0139126	XLOC_047789
TCONS_00158345	-	chr7:118154195-118154415	23.7141	0	#NAME?	down	0.0025	0.0139126	XLOC_104806
TCONS_00109610	-	chr3:46011266-46011503	23.6647	0	#NAME?	down	0.0016	0.0139126	XLOC_070859
TCONS_00102271	-	chr21:15548568-15548805	23.6647	0	#NAME?	down	0.0016	0.0139126	XLOC_066003
TCONS_00153788	-	chr7:114780015-114780261	23.6567	0	#NAME?	down	0.00275	0.0139126	XLOC_101661
TCONS_00051640	-	chr14:103905896-103906119	23.6518	0	#NAME?	down	0.0028	0.0139126	XLOC_034585
TCONS_00050833	-	chr14:76599451-76599674	23.6518	0	#NAME?	down	0.0028	0.0139126	XLOC_034056
TCONS_00129688	-	chr5:62631773-62631996	23.6518	0	#NAME?	down	0.0028	0.0139126	XLOC_085603
TCONS_00016951	-	chr10:38407754-38407977	23.6518	0	#NAME?	down	0.0028	0.0139126	XLOC_010944
TCONS_00178871	-	chrX:39432246-39432466	23.5023	0	#NAME?	down	0.0024	0.0139126	XLOC_119264
TCONS_00111047	-	chr3:111535766-111535986	23.5023	0	#NAME?	down	0.0024	0.0139126	XLOC_071862
TCONS_00171961	-	chr9:82442654-82442874	23.5023	0	#NAME?	down	0.0024	0.0139126	XLOC_114442
TCONS_00139476	-	chr6:45819636-45819862	23.4594	0	#NAME?	down	0.0016	0.0139126	XLOC_092267
TCONS_00161414	-	chr8:74893261-74893487	23.4594	0	#NAME?	down	0.0016	0.0139126	XLOC_106965
TCONS_00109906	-	chr3:52035264-52035495	23.4546	0	#NAME?	down	0.00215	0.0139126	XLOC_071000
TCONS_00125069	-	chr4:38377639-38377871	23.4404	0	#NAME?	down	0.00255	0.0139126	XLOC_082158
TCONS_00041419	-	chr12:132480220-132480452	23.3705	0	#NAME?	down	0.00205	0.0139126	XLOC_027220
TCONS_00040248	-	chr12:92961310-92961545	23.2465	0	#NAME?	down	0.0026	0.0139126	XLOC_026497
TCONS_00093679	-	chr2:72029677-72029900	23.2292	0	#NAME?	down	0.0027	0.0139126	XLOC_060242
TCONS_00027567	-	chr11:121705995-121706218	23.2292	0	#NAME?	down	0.0027	0.0139126	XLOC_018054
TCONS_00077071	-	chr19:41922319-41922542	23.2292	0	#NAME?	down	0.0027	0.0139126	XLOC_050347
TCONS_00178434	-	chrX:13951564-13951787	23.2292	0	#NAME?	down	0.0027	0.0139126	XLOC_118954
TCONS_00111262	-	chr3:115376656-115376903	22.9863	0	#NAME?	down	0.00275	0.0139126	XLOC_072024
TCONS_00029987	-	chr11:65013717-65013938	22.9449	0	#NAME?	down	0.0025	0.0139126	XLOC_019585
TCONS_00027886	-	chr11:130486080-130486301	22.9449	0	#NAME?	down	0.0025	0.0139126	XLOC_018262
TCONS_00074659	-	chr18:73319829-73320050	22.9449	0	#NAME?	down	0.0025	0.0139126	XLOC_048982
TCONS_00093166	-	chr2:60554582-60554809	22.7369	0	#NAME?	down	0.0016	0.0139126	XLOC_059834
TCONS_00135319	-	chr5:112062588-112062815	22.7369	0	#NAME?	down	0.0016	0.0139126	XLOC_089576
TCONS_00131189	-	chr5:116732479-116732706	22.7369	0	#NAME?	down	0.0016	0.0139126	XLOC_086757
TCONS_00017202	-	chr10:53208347-53208568	22.7336	0	#NAME?	down	0.0024	0.0139126	XLOC_011109
TCONS_00014807	-	chr1:221865326-221865547	22.7336	0	#NAME?	down	0.0024	0.0139126	XLOC_009355
TCONS_00155792	-	chr7:26620094-26620315	22.7336	0	#NAME?	down	0.0024	0.0139126	XLOC_103027
TCONS_00126503	-	chr4:107141264-107141485	22.7336	0	#NAME?	down	0.0024	0.0139126	XLOC_083132
TCONS_00044429	-	chr13:46203231-46203452	22.7336	0	#NAME?	down	0.0024	0.0139126	XLOC_029471
TCONS_00114663	-	chr3:17139488-17139709	22.7336	0	#NAME?	down	0.0024	0.0139126	XLOC_074648
TCONS_00010833	-	chr1:83114577-83114798	22.7336	0	#NAME?	down	0.0024	0.0139126	XLOC_006835
TCONS_00006055	-	chr1:183166720-183166941	22.7336	0	#NAME?	down	0.0024	0.0139126	XLOC_003803
TCONS_00002730	-	chr1:60176252-60176487	22.7054	0	#NAME?	down	0.00245	0.0139126	XLOC_001699
TCONS_00162248	-	chr8:107680664-107680905	22.5686	0	#NAME?	down	0.0021	0.0139126	XLOC_107623
TCONS_00069628	-	chr17:42941888-42942124	22.5316	0	#NAME?	down	0.0026	0.0139126	XLOC_045822
TCONS_00002753	-	chr1:62220209-62220445	22.5316	0	#NAME?	down	0.0026	0.0139126	XLOC_001712
TCONS_00108698	-	chr3:27944187-27944411	22.4925	0	#NAME?	down	0.0027	0.0139126	XLOC_070192
TCONS_00110225	-	chr3:70176408-70176632	22.4925	0	#NAME?	down	0.0027	0.0139126	XLOC_071177
TCONS_00139967	-	chr6:80977223-80977447	22.4925	0	#NAME?	down	0.0027	0.0139126	XLOC_092604
TCONS_00132198	-	chr5:149450181-149450405	22.4925	0	#NAME?	down	0.0027	0.0139126	XLOC_087383
TCONS_00095956	-	chr2:175029239-175029468	22.4153	0	#NAME?	down	0.0022	0.0139126	XLOC_061776
TCONS_00018602	-	chr10:100402041-100402263	22.2079	0	#NAME?	down	0.0025	0.0139126	XLOC_012068
TCONS_00004329	-	chr1:120367804-120368032	22.0409	0	#NAME?	down	0.0016	0.0139126	XLOC_002765
TCONS_00002575	-	chr1:55525636-55525864	22.0409	0	#NAME?	down	0.0016	0.0139126	XLOC_001561
TCONS_00071484	-	chr17:63921043-63921281	22.0287	0	#NAME?	down	5e-05	0.00109431	XLOC_046906
TCONS_00138120	-	chr6:18828302-18828536	22.0119	0	#NAME?	down	0.00205	0.0139126	XLOC_091492
TCONS_00135732	-	chr5:130615329-130615563	22.0119	0	#NAME?	down	0.00205	0.0139126	XLOC_089929
TCONS_00045437	-	chr13:109439085-109439319	22.0119	0	#NAME?	down	0.00205	0.0139126	XLOC_030252
TCONS_00123281	-	chr4:153824410-153824632	21.998	0	#NAME?	down	0.0024	0.0139126	XLOC_080781
TCONS_00039577	-	chr12:66694830-66695052	21.998	0	#NAME?	down	0.0024	0.0139126	XLOC_025980
TCONS_00125229	-	chr4:48016218-48016440	21.998	0	#NAME?	down	0.0024	0.0139126	XLOC_082240
TCONS_00140216	-	chr6:90341195-90341444	21.9589	0	#NAME?	down	0.00145	0.0139126	XLOC_092801
TCONS_00022599	-	chr10:119206278-119206510	21.9098	0	#NAME?	down	0.00225	0.0139126	XLOC_014681
TCONS_00094100	-	chr2:95681474-95681716	21.9048	0	#NAME?	down	0.0021	0.0139126	XLOC_060497
TCONS_00139972	-	chr6:81078724-81078949	21.7855	0	#NAME?	down	0.0027	0.0139126	XLOC_092609
TCONS_00094874	-	chr2:126623439-126623664	21.7855	0	#NAME?	down	0.0027	0.0139126	XLOC_061026
TCONS_00116214	-	chr3:67289415-67289640	21.7855	0	#NAME?	down	0.0027	0.0139126	XLOC_075623
TCONS_00145472	-	chr6:95521138-95521363	21.7855	0	#NAME?	down	0.0027	0.0139126	XLOC_096587
TCONS_00015854	-	chr10:3251465-3251696	21.7793	0	#NAME?	down	0.00185	0.0139126	XLOC_010143
TCONS_00178352	-	chrX:10969301-10969532	21.7793	0	#NAME?	down	0.00185	0.0139126	XLOC_118889
TCONS_00162699	-	chr8:129720238-129720478	21.5956	0	#NAME?	down	0.0016	0.0139126	XLOC_108003
TCONS_00162041	-	chr8:96390411-96390651	21.5956	0	#NAME?	down	0.0016	0.0139126	XLOC_107483
TCONS_00165402	-	chr8:101121871-101122097	21.5044	0	#NAME?	down	0.0028	0.0139126	XLOC_109879
TCONS_00158593	-	chr7:130845366-130845592	21.5044	0	#NAME?	down	0.0028	0.0139126	XLOC_104945
TCONS_00045431	-	chr13:109402030-109402256	21.5044	0	#NAME?	down	0.0028	0.0139126	XLOC_030246
TCONS_00077796	-	chr19:50824241-50824464	21.5017	0	#NAME?	down	0.0025	0.0139126	XLOC_050762
TCONS_00022142	-	chr10:101047534-101047757	21.5017	0	#NAME?	down	0.0025	0.0139126	XLOC_014394
TCONS_00096963	-	chr2:208998482-208998705	21.5017	0	#NAME?	down	0.0025	0.0139126	XLOC_062509
TCONS_00051647	-	chr14:104578863-104579086	21.5017	0	#NAME?	down	0.0025	0.0139126	XLOC_034591
TCONS_00141366	-	chr6:139539887-139540115	21.4718	0	#NAME?	down	0.00165	0.0139126	XLOC_093700
TCONS_00166004	-	chr8:129270659-129270887	21.4718	0	#NAME?	down	0.00165	0.0139126	XLOC_110330
TCONS_00048072	-	chr14:82175019-82175247	21.4718	0	#NAME?	down	0.00165	0.0139126	XLOC_032203
TCONS_00088086	-	chr2:116247025-116247253	21.4718	0	#NAME?	down	0.00165	0.0139126	XLOC_056224
TCONS_00165195	-	chr8:94076766-94077003	21.4148	0	#NAME?	down	0.00245	0.0139126	XLOC_109748
TCONS_00036288	-	chr12:97134847-97135084	21.4148	0	#NAME?	down	0.00245	0.0139126	XLOC_023977
TCONS_00066353	-	chr17:48493007-48493242	21.3093	0	#NAME?	down	0.00255	0.0139126	XLOC_043907
TCONS_00072725	-	chr18:47400007-47400242	21.3093	0	#NAME?	down	0.00255	0.0139126	XLOC_047603
TCONS_00018674	-	chr10:102081947-102082182	21.3093	0	#NAME?	down	0.00255	0.0139126	XLOC_012105
TCONS_00105641	-	chr22:36179204-36179427	21.2935	0	#NAME?	down	0.0024	0.0139126	XLOC_068339
TCONS_00173392	-	chr9:119614659-119614882	21.2935	0	#NAME?	down	0.0024	0.0139126	XLOC_115566
TCONS_00089895	-	chr2:190801702-190801925	21.2935	0	#NAME?	down	0.0024	0.0139126	XLOC_057561
TCONS_00129506	-	chr5:52982929-52983152	21.2935	0	#NAME?	down	0.0024	0.0139126	XLOC_085505
TCONS_00027663	-	chr11:124151926-124152149	21.2935	0	#NAME?	down	0.0024	0.0139126	XLOC_018130
TCONS_00005668	-	chr1:169643035-169643258	21.2935	0	#NAME?	down	0.0024	0.0139126	XLOC_003547
TCONS_00126932	-	chr4:127028771-127029004	21.2608	0	#NAME?	down	0.00225	0.0139126	XLOC_083463
TCONS_00118739	-	chr3:176578158-176578408	21.1083	0	#NAME?	down	0.00275	0.0139126	XLOC_077476
TCONS_00022899	-	chr10:127691622-127691848	21.1058	0	#NAME?	down	0.0027	0.0139126	XLOC_014892
TCONS_00096599	-	chr2:196827870-196828096	21.1058	0	#NAME?	down	0.0027	0.0139126	XLOC_062265
TCONS_00046401	-	chr14:38281036-38281267	21.0789	0	#NAME?	down	0.0022	0.0139126	XLOC_030929
TCONS_00145668	-	chr6:107689787-107690024	21.0507	0	#NAME?	down	0.00285	0.0140291	XLOC_096714
TCONS_00117904	-	chr3:144963900-144964148	21.0249	0	#NAME?	down	0.002	0.0139126	XLOC_076839
TCONS_00011154	-	chr1:90784867-90785108	20.9566	0	#NAME?	down	0.0016	0.0139126	XLOC_007075
TCONS_00153683	-	chr7:106973694-106973921	20.8422	0	#NAME?	down	0.0028	0.0139126	XLOC_101613
TCONS_00147376	-	chr6:169368884-169369111	20.8422	0	#NAME?	down	0.0028	0.0139126	XLOC_097955
TCONS_00170918	-	chr9:20268860-20269087	20.8422	0	#NAME?	down	0.0028	0.0139126	XLOC_113693
TCONS_00088277	-	chr2:127397140-127397369	20.8142	0	#NAME?	down	0.00165	0.0139126	XLOC_056359
TCONS_00165842	-	chr8:121959850-121960079	20.8142	0	#NAME?	down	0.00165	0.0139126	XLOC_110199
TCONS_00042618	-	chr13:72638220-72638462	20.7586	0	#NAME?	down	5e-05	0.00109431	XLOC_028096
TCONS_00070664	-	chr17:68097691-68097927	20.7511	0	#NAME?	down	0.00205	0.0139126	XLOC_046430
TCONS_00090547	-	chr2:214599533-214599769	20.7511	0	#NAME?	down	0.00205	0.0139126	XLOC_058007
TCONS_00121756	-	chr4:85367012-85367248	20.7511	0	#NAME?	down	0.00205	0.0139126	XLOC_079637
TCONS_00015830	-	chr10:691137-691371	20.6361	0	#NAME?	down	0.00225	0.0139126	XLOC_010126
TCONS_00092632	-	chr2:46219138-46219362	20.6182	0	#NAME?	down	0.0024	0.0139126	XLOC_059364
TCONS_00110748	-	chr3:97977517-97977741	20.6182	0	#NAME?	down	0.0024	0.0139126	XLOC_071634
TCONS_00088682	-	chr2:150013084-150013308	20.6182	0	#NAME?	down	0.0024	0.0139126	XLOC_056647
TCONS_00101867	-	chr20:57384369-57384593	20.6182	0	#NAME?	down	0.0024	0.0139126	XLOC_065747
TCONS_00142518	-	chr6:3611099-3611323	20.6182	0	#NAME?	down	0.0024	0.0139126	XLOC_094554
TCONS_00135720	-	chr5:129771577-129771817	20.6156	0	#NAME?	down	5e-05	0.00109431	XLOC_089917
TCONS_00050590	-	chr14:69609815-69610058	20.5991	0	#NAME?	down	0.001	0.0139126	XLOC_033904
TCONS_00033773	-	chr12:22697317-22697556	20.547	0	#NAME?	down	0.0026	0.0139126	XLOC_022128
TCONS_00085804	-	chr2:39665078-39665315	20.476	0	#NAME?	down	0.00095	0.0139126	XLOC_054588
TCONS_00178219	-	chrX:6832571-6832798	20.4506	0	#NAME?	down	0.0027	0.0139126	XLOC_118781
TCONS_00074497	-	chr18:61228860-61229087	20.4506	0	#NAME?	down	0.0027	0.0139126	XLOC_048858
TCONS_00052744	-	chr15:40946871-40947098	20.4506	0	#NAME?	down	0.0027	0.0139126	XLOC_035350
TCONS_00062606	-	chr16:57498110-57498337	20.4506	0	#NAME?	down	0.0027	0.0139126	XLOC_041489
TCONS_00116861	-	chr3:107102512-107102739	20.4506	0	#NAME?	down	0.0027	0.0139126	XLOC_076172
TCONS_00145462	-	chr6:92846510-92846737	20.4506	0	#NAME?	down	0.0027	0.0139126	XLOC_096579
TCONS_00089196	-	chr2:171591558-171591790	20.4492	0	#NAME?	down	0.0022	0.0139126	XLOC_057030
TCONS_00131752	-	chr5:138474025-138474266	20.2258	0	#NAME?	down	5e-05	0.00109431	XLOC_087153
TCONS_00144387	-	chr6:53235338-53235566	20.2042	0	#NAME?	down	0.0028	0.0139126	XLOC_095724
TCONS_00034057	-	chr12:27197872-27198102	20.1817	0	#NAME?	down	0.00165	0.0139126	XLOC_022363
TCONS_00122006	-	chr4:101591021-101591251	20.1817	0	#NAME?	down	0.00165	0.0139126	XLOC_079794
TCONS_00013830	-	chr1:178724275-178724505	20.1817	0	#NAME?	down	0.00165	0.0139126	XLOC_008710
TCONS_00131507	-	chr5:132278891-132279116	20.1745	0	#NAME?	down	0.0025	0.0139126	XLOC_086978
TCONS_00163325	-	chr8:13547150-13547375	20.1745	0	#NAME?	down	0.0025	0.0139126	XLOC_108425
TCONS_00130343	-	chr5:82676491-82676733	20.1381	0	#NAME?	down	0.0001	0.00197988	XLOC_086040
TCONS_00007756	-	chr1:239482983-239483220	20.024	0	#NAME?	down	0.00255	0.0139126	XLOC_004917
TCONS_00137875	-	chr6:7702551-7702776	19.9701	0	#NAME?	down	0.0024	0.0139126	XLOC_091310
TCONS_00042321	-	chr13:47132224-47132449	19.9701	0	#NAME?	down	0.0024	0.0139126	XLOC_027889
TCONS_00029190	-	chr11:32110611-32110836	19.9701	0	#NAME?	down	0.0024	0.0139126	XLOC_019139
TCONS_00114795	-	chr3:22269044-22269269	19.9701	0	#NAME?	down	0.0024	0.0139126	XLOC_074739
TCONS_00141923	-	chr6:155808111-155808336	19.9701	0	#NAME?	down	0.0024	0.0139126	XLOC_094109
TCONS_00089923	-	chr2:191725897-191726130	19.8434	0	#NAME?	down	0.0022	0.0139126	XLOC_057572
TCONS_00102381	-	chr21:24496472-24496705	19.8434	0	#NAME?	down	0.0022	0.0139126	XLOC_066084
TCONS_00118852	-	chr3:178979204-178979432	19.8201	0	#NAME?	down	0.0027	0.0139126	XLOC_077584
TCONS_00127545	-	chr4:149878153-149878381	19.8201	0	#NAME?	down	0.0027	0.0139126	XLOC_083989
TCONS_00061036	-	chr16:88637105-88637333	19.8201	0	#NAME?	down	0.0027	0.0139126	XLOC_040613
TCONS_00033462	-	chr12:13143062-13143290	19.8201	0	#NAME?	down	0.0027	0.0139126	XLOC_021890
TCONS_00112518	-	chr3:152947410-152947638	19.8201	0	#NAME?	down	0.0027	0.0139126	XLOC_072980
TCONS_00080178	-	chr19:22615908-22616136	19.8201	0	#NAME?	down	0.0027	0.0139126	XLOC_052038
TCONS_00120805	-	chr4:44759249-44759477	19.8201	0	#NAME?	down	0.0027	0.0139126	XLOC_078909
TCONS_00070187	-	chr17:50235714-50235962	19.7109	0	#NAME?	down	0.0022	0.0139126	XLOC_046165
TCONS_00027936	-	chr11:356103-356343	19.6494	0	#NAME?	down	0.00245	0.0139126	XLOC_018293
TCONS_00077125	-	chr19:42941635-42941864	19.5893	0	#NAME?	down	0.0028	0.0139126	XLOC_050391
TCONS_00162618	-	chr8:127197900-127198129	19.5893	0	#NAME?	down	0.0028	0.0139126	XLOC_107931
TCONS_00044543	-	chr13:48209957-48210188	19.5733	0	#NAME?	down	0.00165	0.0139126	XLOC_029565
TCONS_00028756	-	chr11:12102600-12102826	19.5495	0	#NAME?	down	0.0025	0.0139126	XLOC_018848
TCONS_00112459	-	chr3:152223826-152224052	19.5495	0	#NAME?	down	0.0025	0.0139126	XLOC_072937
TCONS_00107978	-	chr3:5471095-5471321	19.5495	0	#NAME?	down	0.0025	0.0139126	XLOC_069654
TCONS_00022934	-	chr10:130129262-130129488	19.5495	0	#NAME?	down	0.0025	0.0139126	XLOC_014918
TCONS_00038607	-	chr12:48038069-48038301	19.5074	0	#NAME?	down	0.0016	0.0139126	XLOC_025399
TCONS_00049111	-	chr14:20732815-20733053	19.4178	0	#NAME?	down	0.00255	0.0139126	XLOC_032876
TCONS_00110131	-	chr3:63005751-63005977	19.347	0	#NAME?	down	0.0024	0.0139126	XLOC_071128
TCONS_00016705	-	chr10:31068782-31069008	19.347	0	#NAME?	down	0.0024	0.0139126	XLOC_010774
TCONS_00012542	-	chr1:150884008-150884234	19.347	0	#NAME?	down	0.0024	0.0139126	XLOC_007970
TCONS_00088683	-	chr2:150363797-150364023	19.347	0	#NAME?	down	0.0024	0.0139126	XLOC_056648
TCONS_00020687	-	chr10:45218662-45235925	19.347	0	#NAME?	down	0.0024	0.0139126	XLOC_013441
TCONS_00170982	-	chr9:23673258-23673484	19.347	0	#NAME?	down	0.0024	0.0139126	XLOC_113743
TCONS_00133489	-	chr5:29668566-29668806	19.3271	0	#NAME?	down	0.00285	0.0140291	XLOC_088254
TCONS_00137564	-	chr6:483931-484160	19.2131	0	#NAME?	down	0.0027	0.0139126	XLOC_091060
TCONS_00003796	-	chr1:108091204-108091433	19.2131	0	#NAME?	down	0.0027	0.0139126	XLOC_002423
TCONS_00002629	-	chr1:55802018-55802247	19.2131	0	#NAME?	down	0.0027	0.0139126	XLOC_001615
TCONS_00045257	-	chr13:97882633-97882862	19.2131	0	#NAME?	down	0.0027	0.0139126	XLOC_030117
TCONS_00085753	-	chr2:37792815-37793044	19.2131	0	#NAME?	down	0.0027	0.0139126	XLOC_054556
TCONS_00055416	-	chr15:39481325-39481564	19.0278	0	#NAME?	down	0.00205	0.0139126	XLOC_037205
TCONS_00161634	-	chr8:79008783-79009013	18.9978	0	#NAME?	down	0.0028	0.0139126	XLOC_107169
TCONS_00069947	-	chr17:46820996-46821228	18.9885	0	#NAME?	down	0.00165	0.0139126	XLOC_046005
TCONS_00076652	-	chr19:36179189-36179438	18.966	0	#NAME?	down	5e-05	0.00109431	XLOC_050107
TCONS_00097288	-	chr2:219695722-219695949	18.9474	0	#NAME?	down	0.0025	0.0139126	XLOC_062708
TCONS_00168958	-	chr9:99256955-99257182	18.9474	0	#NAME?	down	0.0025	0.0139126	XLOC_112418
TCONS_00036026	-	chr12:92176060-92176293	18.9334	0	#NAME?	down	0.0016	0.0139126	XLOC_023772
TCONS_00070419	-	chr17:61661960-61662193	18.9334	0	#NAME?	down	0.0016	0.0139126	XLOC_046292
TCONS_00126368	-	chr4:102353805-102354038	18.9334	0	#NAME?	down	0.0016	0.0139126	XLOC_083047
TCONS_00146847	-	chr6:152114861-152115100	18.8347	0	#NAME?	down	0.00255	0.0139126	XLOC_097523
TCONS_00165584	-	chr8:109181445-109181686	18.7931	0	#NAME?	down	0.00285	0.0140291	XLOC_110009
TCONS_00121217	-	chr4:68051778-68052014	18.7795	0	#NAME?	down	0.00185	0.0139126	XLOC_079231
TCONS_00098963	-	chr20:31596142-31596378	18.7795	0	#NAME?	down	0.00185	0.0139126	XLOC_063973
TCONS_00158526	-	chr7:128410042-128410284	18.7756	0	#NAME?	down	0.0026	0.0139126	XLOC_104903
TCONS_00151605	-	chr7:37993157-37993384	18.7464	0	#NAME?	down	0.0024	0.0139126	XLOC_100177
TCONS_00179703	-	chrX:70253404-70253631	18.7464	0	#NAME?	down	0.0024	0.0139126	XLOC_119820
TCONS_00108986	-	chr3:34272068-34272295	18.7464	0	#NAME?	down	0.0024	0.0139126	XLOC_070441
TCONS_00019114	-	chr10:117451902-117452129	18.7464	0	#NAME?	down	0.0024	0.0139126	XLOC_012405
TCONS_00074619	-	chr18:69851678-69851933	18.7348	0	#NAME?	down	5e-05	0.00109431	XLOC_048956
TCONS_00170793	-	chr9:8301446-8301676	18.6293	0	#NAME?	down	0.0027	0.0139126	XLOC_113627
TCONS_00138174	-	chr6:20498395-20498635	18.4936	0	#NAME?	down	0.00205	0.0139126	XLOC_091540
TCONS_00006291	-	chr1:193476562-193476804	18.4294	0	#NAME?	down	0.0028	0.0139126	XLOC_003977
TCONS_00168244	-	chr9:75393717-75393948	18.4286	0	#NAME?	down	0.0028	0.0139126	XLOC_111900
TCONS_00134793	-	chr5:92414701-92414934	18.426	0	#NAME?	down	0.00165	0.0139126	XLOC_089153
TCONS_00122172	-	chr4:108243325-108243558	18.426	0	#NAME?	down	0.00165	0.0139126	XLOC_079931
TCONS_00180545	-	chrX:123859539-123859767	18.3674	0	#NAME?	down	0.0025	0.0139126	XLOC_120366
TCONS_00116068	-	chr3:63808775-63809003	18.3674	0	#NAME?	down	0.0025	0.0139126	XLOC_075501
TCONS_00068364	-	chr17:11573931-11574169	18.3572	0	#NAME?	down	0.00225	0.0139126	XLOC_045047
TCONS_00158053	-	chr7:106240149-106240389	18.2732	0	#NAME?	down	0.00255	0.0139126	XLOC_104579
TCONS_00075763	-	chr19:14617816-14618056	18.2732	0	#NAME?	down	0.00255	0.0139126	XLOC_049597
TCONS_00165684	-	chr8:116606387-116606627	18.2732	0	#NAME?	down	0.00255	0.0139126	XLOC_110071
TCONS_00111846	-	chr3:134689177-134689434	18.2543	0	#NAME?	down	5e-05	0.00109431	XLOC_072437
TCONS_00158316	-	chr7:118024287-118024530	18.2275	0	#NAME?	down	0.0026	0.0139126	XLOC_104777
TCONS_00063396	-	chr16:73879862-73880090	18.1685	0	#NAME?	down	0.0024	0.0139126	XLOC_042079
TCONS_00043876	-	chr13:33015054-33015282	18.1685	0	#NAME?	down	0.0024	0.0139126	XLOC_029050
TCONS_00172941	-	chr9:108449462-108449690	18.1685	0	#NAME?	down	0.0024	0.0139126	XLOC_115226
TCONS_00121637	-	chr4:80210470-80210706	18.1572	0	#NAME?	down	0.0022	0.0139126	XLOC_079533
TCONS_00158039	-	chr7:105598374-105598610	18.1572	0	#NAME?	down	0.0022	0.0139126	XLOC_104570
TCONS_00102197	-	chr21:8989874-8990110	18.1572	0	#NAME?	down	0.0022	0.0139126	XLOC_065948
TCONS_00158575	-	chr7:130389492-130389735	18.0638	0	#NAME?	down	0.00245	0.0139126	XLOC_104938
TCONS_00090600	-	chr2:216711181-216711424	18.0638	0	#NAME?	down	0.00245	0.0139126	XLOC_058052
TCONS_00074688	-	chr18:75172345-75172594	18.0629	0	#NAME?	down	0.0001	0.00197988	XLOC_049005
TCONS_00017071	-	chr10:46459683-46459923	18.0387	0	#NAME?	down	0.00215	0.0139126	XLOC_011027
TCONS_00165399	-	chr8:101116332-101116566	17.8846	0	#NAME?	down	0.00165	0.0139126	XLOC_109876
TCONS_00065713	-	chr17:36676827-36677061	17.8846	0	#NAME?	down	0.00165	0.0139126	XLOC_043545
TCONS_00097994	-	chr2:15128637-15128869	17.8818	0	#NAME?	down	0.0028	0.0139126	XLOC_063250
TCONS_00164192	-	chr8:58226581-58226813	17.8818	0	#NAME?	down	0.0028	0.0139126	XLOC_109008
TCONS_00121679	-	chr4:83931957-83932189	17.8818	0	#NAME?	down	0.0028	0.0139126	XLOC_079562
TCONS_00043745	-	chr13:30334825-30335064	17.8385	0	#NAME?	down	0.00225	0.0139126	XLOC_028948
TCONS_00065989	-	chr17:42526150-42526379	17.8085	0	#NAME?	down	0.0025	0.0139126	XLOC_043709
TCONS_00152934	-	chr7:83858186-83858415	17.8085	0	#NAME?	down	0.0025	0.0139126	XLOC_101116
TCONS_00124867	-	chr4:23750760-23750989	17.8085	0	#NAME?	down	0.0025	0.0139126	XLOC_081985
TCONS_00167809	-	chr9:42335544-42335773	17.8085	0	#NAME?	down	0.0025	0.0139126	XLOC_111541
TCONS_00145466	-	chr6:92926702-92926931	17.8085	0	#NAME?	down	0.0025	0.0139126	XLOC_096583
TCONS_00067899	-	chr17:3155912-3156141	17.8085	0	#NAME?	down	0.0025	0.0139126	XLOC_044834
TCONS_00006423	-	chr1:201529786-201530031	17.7687	0	#NAME?	down	0.0019	0.0139126	XLOC_004078
TCONS_00137566	-	chr6:704517-704758	17.7325	0	#NAME?	down	0.00255	0.0139126	XLOC_091062
TCONS_00090033	-	chr2:199987934-199988175	17.7325	0	#NAME?	down	0.00255	0.0139126	XLOC_057664
TCONS_00060925	-	chr16:86510074-86510312	17.7277	0	#NAME?	down	0.00185	0.0139126	XLOC_040528
TCONS_00074825	-	chr19:850753-850990	17.6357	0	#NAME?	down	0.0022	0.0139126	XLOC_049091
TCONS_00047947	-	chr14:76366727-76366956	17.612	0	#NAME?	down	0.0024	0.0139126	XLOC_032103
TCONS_00159584	-	chr8:1793857-1794086	17.612	0	#NAME?	down	0.0024	0.0139126	XLOC_105645
TCONS_00034509	-	chr12:48414445-48414674	17.612	0	#NAME?	down	0.0024	0.0139126	XLOC_022683
TCONS_00038252	-	chr12:29388767-29388996	17.612	0	#NAME?	down	0.0024	0.0139126	XLOC_025159
TCONS_00066162	-	chr17:44921107-44921339	17.5279	0	#NAME?	down	0.0027	0.0139126	XLOC_043801
TCONS_00150879	-	chr7:18086411-18086643	17.5279	0	#NAME?	down	0.0027	0.0139126	XLOC_099651
TCONS_00144992	-	chr6:77449476-77449718	17.481	0	#NAME?	down	0.00205	0.0139126	XLOC_096236
TCONS_00033563	-	chr12:16074530-16074788	17.3885	0	#NAME?	down	0.00095	0.0139126	XLOC_021968
TCONS_00162752	-	chr8:136851124-136851359	17.363	0	#NAME?	down	0.00165	0.0139126	XLOC_108040
TCONS_00181202	-	chrX:151388494-151388729	17.363	0	#NAME?	down	0.00165	0.0139126	XLOC_120844
TCONS_00101472	-	chr20:45709196-45709460	17.3581	0	#NAME?	down	5e-05	0.00109431	XLOC_065511
TCONS_00049195	-	chr14:21704172-21704412	17.3377	0	#NAME?	down	0.00225	0.0139126	XLOC_032913
TCONS_00017369	-	chr10:62166901-62167137	17.3349	0	#NAME?	down	0.0016	0.0139126	XLOC_011249
TCONS_00010861	-	chr1:83255922-83256158	17.3349	0	#NAME?	down	0.0016	0.0139126	XLOC_006863
TCONS_00142075	-	chr6:160166993-160167246	17.2732	0	#NAME?	down	5e-05	0.00109431	XLOC_094216
TCONS_00163053	-	chr8:1748326-1748556	17.2707	0	#NAME?	down	0.0025	0.0139126	XLOC_108222
TCONS_00061249	-	chr16:359387-359617	17.2707	0	#NAME?	down	0.0025	0.0139126	XLOC_040715
TCONS_00108254	-	chr3:14939946-14940211	17.2407	0	#NAME?	down	5e-05	0.00109431	XLOC_069799
TCONS_00110854	-	chr3:101513342-101513606	17.2405	0	#NAME?	down	5e-05	0.00109431	XLOC_071712
TCONS_00132469	-	chr5:158220359-158220598	17.2302	0	#NAME?	down	0.00185	0.0139126	XLOC_087564
TCONS_00167694	-	chr9:39518651-39518890	17.2302	0	#NAME?	down	0.00185	0.0139126	XLOC_111433
TCONS_00179894	-	chrX:76011457-76011699	17.2109	0	#NAME?	down	0.00255	0.0139126	XLOC_119948
TCONS_00146116	-	chr6:127066908-127067150	17.2109	0	#NAME?	down	0.00255	0.0139126	XLOC_097026
TCONS_00130663	-	chr5:91535203-91535443	17.1926	0	#NAME?	down	0.00225	0.0139126	XLOC_086332
TCONS_00070154	-	chr17:49939759-49940004	17.1898	0	#NAME?	down	0.0026	0.0139126	XLOC_046145
TCONS_00116123	-	chr3:64384583-64384816	17.169	0	#NAME?	down	0.00265	0.0139126	XLOC_075547
TCONS_00001424	-	chr1:31381574-31381812	17.1334	0	#NAME?	down	0.0022	0.0139126	XLOC_000839
TCONS_00114801	-	chr3:24106785-24107023	17.1334	0	#NAME?	down	0.0022	0.0139126	XLOC_074745
TCONS_00179664	-	chrX:67801631-67801879	17.0827	0	#NAME?	down	0.0016	0.0139126	XLOC_119787
TCONS_00132293	-	chr5:151633605-151633835	17.0768	0	#NAME?	down	0.0024	0.0139126	XLOC_087447
TCONS_00178516	-	chrX:16568852-16569082	17.0768	0	#NAME?	down	0.0024	0.0139126	XLOC_119010
TCONS_00162762	-	chr8:138104226-138104456	17.0768	0	#NAME?	down	0.0024	0.0139126	XLOC_108050
TCONS_00055691	-	chr15:48389434-48389664	17.0768	0	#NAME?	down	0.0024	0.0139126	XLOC_037346
TCONS_00011951	-	chr1:118558509-118558756	17.0181	0	#NAME?	down	5e-05	0.00109431	XLOC_007578
TCONS_00132525	-	chr5:160434098-160434331	17.0086	0	#NAME?	down	0.0027	0.0139126	XLOC_087610
TCONS_00070773	-	chr17:71275286-71275519	17.0086	0	#NAME?	down	0.0027	0.0139126	XLOC_046516
TCONS_00020126	-	chr10:22463664-22463897	17.0086	0	#NAME?	down	0.0027	0.0139126	XLOC_013083
TCONS_00043211	-	chr13:106595072-106595305	17.0086	0	#NAME?	down	0.0027	0.0139126	XLOC_028575
TCONS_00047537	-	chr14:68772568-68772801	17.0086	0	#NAME?	down	0.0027	0.0139126	XLOC_031839
TCONS_00151646	-	chr7:38170251-38170485	16.849	0	#NAME?	down	0.0028	0.0139126	XLOC_100218
TCONS_00036435	-	chr12:102954596-102954833	16.8406	0	#NAME?	down	0.0016	0.0139126	XLOC_024066
TCONS_00009131	-	chr1:27521962-27522199	16.8406	0	#NAME?	down	0.0016	0.0139126	XLOC_005730
TCONS_00003426	-	chr1:89946771-89947027	16.8346	0	#NAME?	down	0.002	0.0139126	XLOC_002186
TCONS_00173411	-	chr9:119875993-119876224	16.7533	0	#NAME?	down	0.0025	0.0139126	XLOC_115585
TCONS_00087106	-	chr2:86811239-86811470	16.7533	0	#NAME?	down	0.0025	0.0139126	XLOC_055561
TCONS_00140076	-	chr6:84781424-84781655	16.7533	0	#NAME?	down	0.0025	0.0139126	XLOC_092695
TCONS_00145901	-	chr6:117632307-117632538	16.7533	0	#NAME?	down	0.0025	0.0139126	XLOC_096853
TCONS_00089633	-	chr2:183557167-183557398	16.7533	0	#NAME?	down	0.0025	0.0139126	XLOC_057342
TCONS_00059679	-	chr16:47733781-47734012	16.7533	0	#NAME?	down	0.0025	0.0139126	XLOC_039742
TCONS_00049245	-	chr14:22853446-22853677	16.7533	0	#NAME?	down	0.0025	0.0139126	XLOC_032961
TCONS_00127018	-	chr4:133852273-133852516	16.7086	0	#NAME?	down	0.00255	0.0139126	XLOC_083543
TCONS_00111259	-	chr3:115369789-115370032	16.7086	0	#NAME?	down	0.00255	0.0139126	XLOC_072021
TCONS_00101843	-	chr20:53612426-53612665	16.6493	0	#NAME?	down	0.0022	0.0139126	XLOC_065732
TCONS_00041679	-	chr13:22110962-22111201	16.6493	0	#NAME?	down	0.0022	0.0139126	XLOC_027413
TCONS_00142114	-	chr6:163586948-163587187	16.6493	0	#NAME?	down	0.0022	0.0139126	XLOC_094238
TCONS_00051639	-	chr14:103894878-103895161	16.6073	0	#NAME?	down	5e-05	0.00109431	XLOC_034584
TCONS_00003436	-	chr1:89987492-89987750	16.5813	0	#NAME?	down	5e-05	0.00109431	XLOC_002196
TCONS_00027368	-	chr11:118012233-118012464	16.562	0	#NAME?	down	0.0024	0.0139126	XLOC_017949
TCONS_00146257	-	chr6:131318672-131318916	16.538	0	#NAME?	down	0.00205	0.0139126	XLOC_097124
TCONS_00127131	-	chr4:138747202-138747436	16.5089	0	#NAME?	down	0.0027	0.0139126	XLOC_083651
TCONS_00142794	-	chr6:14894101-14894335	16.5089	0	#NAME?	down	0.0027	0.0139126	XLOC_094740
TCONS_00132247	-	chr5:150592617-150592859	16.3884	0	#NAME?	down	0.00225	0.0139126	XLOC_087414
TCONS_00053269	-	chr15:57815741-57815983	16.3884	0	#NAME?	down	0.00225	0.0139126	XLOC_035676
TCONS_00127906	-	chr4:163061632-163061878	16.3871	0	#NAME?	down	0.00285	0.0140291	XLOC_084292
TCONS_00026836	-	chr11:101431753-101431988	16.3608	0	#NAME?	down	0.0028	0.0139126	XLOC_017579
TCONS_00043681	-	chr13:27997821-27998053	16.2562	0	#NAME?	down	0.0025	0.0139126	XLOC_028901
TCONS_00117272	-	chr3:124892830-124893062	16.2562	0	#NAME?	down	0.0025	0.0139126	XLOC_076416
TCONS_00097366	-	chr2:224272857-224273131	16.2496	0	#NAME?	down	5e-05	0.00109431	XLOC_062765
TCONS_00091871	-	chr2:16379663-16379907	16.2243	0	#NAME?	down	0.00255	0.0139126	XLOC_058867
TCONS_00092633	-	chr2:46251957-46252201	16.2243	0	#NAME?	down	0.00255	0.0139126	XLOC_059365
TCONS_00044170	-	chr13:40131240-40131495	16.2153	0	#NAME?	down	0.0022	0.0139126	XLOC_029272
TCONS_00007034	-	chr1:214684312-214684576	16.2116	0	#NAME?	down	0.0001	0.00197988	XLOC_004428
TCONS_00096964	-	chr2:209047143-209047383	16.1819	0	#NAME?	down	0.0022	0.0139126	XLOC_062510
TCONS_00178416	-	chrX:13231390-13231630	16.1819	0	#NAME?	down	0.0022	0.0139126	XLOC_118945
TCONS_00125159	-	chr4:42272396-42272636	16.1819	0	#NAME?	down	0.0022	0.0139126	XLOC_082200
TCONS_00038217	-	chr12:27776672-27776912	16.1819	0	#NAME?	down	0.0022	0.0139126	XLOC_025133
TCONS_00139669	-	chr6:58293051-58293291	16.1819	0	#NAME?	down	0.0022	0.0139126	XLOC_092390
TCONS_00121590	-	chr4:78955809-78956049	16.1819	0	#NAME?	down	0.0022	0.0139126	XLOC_079500
TCONS_00037401	-	chr12:1661987-1662219	16.0672	0	#NAME?	down	0.0024	0.0139126	XLOC_024632
TCONS_00158104	-	chr7:108536236-108536468	16.0672	0	#NAME?	down	0.0024	0.0139126	XLOC_104607
TCONS_00024036	-	chr11:19315396-19315631	16.0274	0	#NAME?	down	0.0027	0.0139126	XLOC_015680
TCONS_00085041	-	chr2:17959860-17960095	16.0274	0	#NAME?	down	0.0027	0.0139126	XLOC_054039
TCONS_00115732	-	chr3:49878105-49878340	16.0274	0	#NAME?	down	0.0027	0.0139126	XLOC_075332
TCONS_00029708	-	chr11:61069377-61069612	16.0274	0	#NAME?	down	0.0027	0.0139126	XLOC_019476
TCONS_00050392	-	chr14:65151439-65151697	15.9583	0	#NAME?	down	0.002	0.0139126	XLOC_033728
TCONS_00003006	-	chr1:71311804-71312051	15.9545	0	#NAME?	down	0.00285	0.0140291	XLOC_001874
TCONS_00092538	-	chr2:43132901-43133144	15.9387	0	#NAME?	down	0.00225	0.0139126	XLOC_059295
TCONS_00002696	-	chr1:58769050-58769300	15.9353	0	#NAME?	down	0.0001	0.00197988	XLOC_001677
TCONS_00161790	-	chr8:88442423-88442661	15.9096	0	#NAME?	down	0.00165	0.0139126	XLOC_107301
TCONS_00145620	-	chr6:106116357-106116595	15.9096	0	#NAME?	down	0.00165	0.0139126	XLOC_096690
TCONS_00142882	-	chr6:19492415-19492653	15.9096	0	#NAME?	down	0.00165	0.0139126	XLOC_094807
TCONS_00152466	-	chr7:73378662-73378914	15.86	0	#NAME?	down	5e-05	0.00109431	XLOC_100770
TCONS_00003135	-	chr1:75990906-75991148	15.8403	0	#NAME?	down	0.00185	0.0139126	XLOC_001977
TCONS_00145605	-	chr6:105705863-105706105	15.8403	0	#NAME?	down	0.00185	0.0139126	XLOC_096675
TCONS_00146934	-	chr6:156006687-156006929	15.8403	0	#NAME?	down	0.00185	0.0139126	XLOC_097586
TCONS_00057181	-	chr15:82962696-82962938	15.8403	0	#NAME?	down	0.00185	0.0139126	XLOC_038319
TCONS_00156487	-	chr7:46023154-46023387	15.7778	0	#NAME?	down	0.0025	0.0139126	XLOC_103489
TCONS_00085304	-	chr2:21836415-21836648	15.7778	0	#NAME?	down	0.0025	0.0139126	XLOC_054293
TCONS_00129294	-	chr5:41304472-41304720	15.7677	0	#NAME?	down	0.00245	0.0139126	XLOC_085341
TCONS_00071457	-	chr17:82713201-82713442	15.7312	0	#NAME?	down	0.0022	0.0139126	XLOC_046880
TCONS_00060225	-	chr16:67983838-67984079	15.7312	0	#NAME?	down	0.0022	0.0139126	XLOC_040037
TCONS_00092883	-	chr2:55508990-55509235	15.7127	0	#NAME?	down	0.00215	0.0139126	XLOC_059564
TCONS_00093512	-	chr2:67725488-67725739	15.6939	0	#NAME?	down	0.0016	0.0139126	XLOC_060139
TCONS_00169048	-	chr9:104280349-104280595	15.6597	0	#NAME?	down	0.00205	0.0139126	XLOC_112471
TCONS_00028627	-	chr11:9015707-9015940	15.5912	0	#NAME?	down	0.0024	0.0139126	XLOC_018754
TCONS_00102913	-	chr21:39115875-39116108	15.5912	0	#NAME?	down	0.0024	0.0139126	XLOC_066486
TCONS_00074472	-	chr18:59422088-59422324	15.5633	0	#NAME?	down	0.0027	0.0139126	XLOC_048835
TCONS_00030979	-	chr11:93088024-93088260	15.5633	0	#NAME?	down	0.0027	0.0139126	XLOC_020200
TCONS_00040332	-	chr12:94756558-94756810	15.5629	0	#NAME?	down	0.0016	0.0139126	XLOC_026572
TCONS_00064045	-	chr16:87811250-87811494	15.5044	0	#NAME?	down	0.00225	0.0139126	XLOC_042577
TCONS_00145838	-	chr6:113828556-113828793	15.4372	0	#NAME?	down	0.0028	0.0139126	XLOC_096807
TCONS_00046600	-	chr14:42018102-42018351	15.327	0	#NAME?	down	0.0026	0.0139126	XLOC_031110
TCONS_00167207	-	chr9:21940936-21941170	15.3173	0	#NAME?	down	0.0025	0.0139126	XLOC_111118
TCONS_00074293	-	chr18:53646963-53647209	15.2946	0	#NAME?	down	0.00215	0.0139126	XLOC_048695
TCONS_00155008	-	chr7:1418109-1418361	15.2616	0	#NAME?	down	0.0016	0.0139126	XLOC_102414
TCONS_00152809	-	chr7:79589798-79590045	15.2432	0	#NAME?	down	0.00205	0.0139126	XLOC_101009
TCONS_00073905	-	chr18:34907892-34908154	15.1618	0	#NAME?	down	5e-05	0.00109431	XLOC_048444
TCONS_00019741	-	chr10:5540665-5540899	15.1332	0	#NAME?	down	0.0024	0.0139126	XLOC_012849
TCONS_00038226	-	chr12:28085626-28085860	15.1332	0	#NAME?	down	0.0024	0.0139126	XLOC_025136
TCONS_00030566	-	chr11:75208553-75208787	15.1332	0	#NAME?	down	0.0024	0.0139126	XLOC_019924
TCONS_00048305	-	chr14:94343848-94344082	15.1332	0	#NAME?	down	0.0024	0.0139126	XLOC_032353
TCONS_00091877	-	chr2:16505118-16505363	15.0854	0	#NAME?	down	0.00225	0.0139126	XLOC_058873
TCONS_00087075	-	chr2:85895667-85895921	15.0664	0	#NAME?	down	5e-05	0.00109431	XLOC_055541
TCONS_00006665	-	chr1:204693344-204693585	15.0345	0	#NAME?	down	0.0016	0.0139126	XLOC_004236
TCONS_00110949	-	chr3:106196015-106196256	15.0345	0	#NAME?	down	0.0016	0.0139126	XLOC_071788
TCONS_00122635	-	chr4:125495668-125495908	15.026	0	#NAME?	down	0.00165	0.0139126	XLOC_080292
TCONS_00056369	-	chr15:65081237-65081489	15.0252	0	#NAME?	down	5e-05	0.00109431	XLOC_037829
TCONS_00045084	-	chr13:80000778-80001016	15.0004	0	#NAME?	down	0.0028	0.0139126	XLOC_029973
TCONS_00164920	-	chr8:87719880-87720118	15.0004	0	#NAME?	down	0.0028	0.0139126	XLOC_109542
TCONS_00125065	-	chr4:37887384-37887622	15.0004	0	#NAME?	down	0.0028	0.0139126	XLOC_082154
TCONS_00080317	-	chr19:29193094-29193338	14.9924	0	#NAME?	down	0.00185	0.0139126	XLOC_052143
TCONS_00166930	-	chr9:7241722-7241972	14.9527	0	#NAME?	down	0.00245	0.0139126	XLOC_110882
TCONS_00120094	-	chr4:8913128-8913380	14.9242	0	#NAME?	down	5e-05	0.00109431	XLOC_078362
TCONS_00000952	-	chr1:19919746-19919998	14.9242	0	#NAME?	down	5e-05	0.00109431	XLOC_000589
TCONS_00027296	-	chr11:114736994-114737255	14.9127	0	#NAME?	down	0.0002	0.00360609	XLOC_017896
TCONS_00154235	-	chr7:135994809-135995056	14.8735	0	#NAME?	down	0.00255	0.0139126	XLOC_101942
TCONS_00121229	-	chr4:69215870-69216117	14.8735	0	#NAME?	down	0.00255	0.0139126	XLOC_079241
TCONS_00048445	-	chr14:96981257-96981504	14.8735	0	#NAME?	down	0.00255	0.0139126	XLOC_032467
TCONS_00018612	-	chr10:100571374-100571621	14.8735	0	#NAME?	down	0.00255	0.0139126	XLOC_012077
TCONS_00088115	-	chr2:118880332-118880567	14.8734	0	#NAME?	down	0.0025	0.0139126	XLOC_056249
TCONS_00091361	-	chr2:239029550-239029785	14.8734	0	#NAME?	down	0.0025	0.0139126	XLOC_058558
TCONS_00167139	-	chr9:18285978-18286213	14.8734	0	#NAME?	down	0.0025	0.0139126	XLOC_111068
TCONS_00128928	-	chr5:17757474-17757727	14.8444	0	#NAME?	down	0.0016	0.0139126	XLOC_085041
TCONS_00116875	-	chr3:107507094-107507347	14.8334	0	#NAME?	down	5e-05	0.00109431	XLOC_076184
TCONS_00106725	-	chr22:27723764-27724014	14.7384	0	#NAME?	down	0.00285	0.0140291	XLOC_068953
TCONS_00063850	-	chr16:84275693-84275943	14.7384	0	#NAME?	down	0.00285	0.0140291	XLOC_042424
TCONS_00133493	-	chr5:31055223-31055458	14.6918	0	#NAME?	down	0.0024	0.0139126	XLOC_088258
TCONS_00120364	-	chr4:22680865-22681100	14.6918	0	#NAME?	down	0.0024	0.0139126	XLOC_078582
TCONS_00102419	-	chr21:26644813-26645048	14.6918	0	#NAME?	down	0.0024	0.0139126	XLOC_066110
TCONS_00164258	-	chr8:60672678-60672913	14.6918	0	#NAME?	down	0.0024	0.0139126	XLOC_109063
TCONS_00029159	-	chr11:31133332-31133567	14.6918	0	#NAME?	down	0.0024	0.0139126	XLOC_019124
TCONS_00144460	-	chr6:54693934-54694189	14.6874	0	#NAME?	down	5e-05	0.00109431	XLOC_095787
TCONS_00093810	-	chr2:75312734-75312972	14.6858	0	#NAME?	down	0.0027	0.0139126	XLOC_060316
TCONS_00013957	-	chr1:183605149-183605387	14.6858	0	#NAME?	down	0.0027	0.0139126	XLOC_008792
TCONS_00110361	-	chr3:76292893-76293131	14.6858	0	#NAME?	down	0.0027	0.0139126	XLOC_071302
TCONS_00014130	-	chr1:197482883-197483121	14.6858	0	#NAME?	down	0.0027	0.0139126	XLOC_008933
TCONS_00178720	-	chrX:33340590-33340828	14.6858	0	#NAME?	down	0.0027	0.0139126	XLOC_119122
TCONS_00131424	-	chr5:128918975-128919221	14.681	0	#NAME?	down	0.00225	0.0139126	XLOC_086909
TCONS_00095451	-	chr2:155839841-155840082	14.6075	0	#NAME?	down	0.00165	0.0139126	XLOC_061430
TCONS_00044907	-	chr13:76348927-76349168	14.6075	0	#NAME?	down	0.00165	0.0139126	XLOC_029818
TCONS_00159270	-	chr7:150939358-150939599	14.6075	0	#NAME?	down	0.00165	0.0139126	XLOC_105442
TCONS_00101946	-	chr20:58973279-58973520	14.6075	0	#NAME?	down	0.00165	0.0139126	XLOC_065783
TCONS_00126269	-	chr4:98446819-98447060	14.6075	0	#NAME?	down	0.00165	0.0139126	XLOC_082985
TCONS_00047047	-	chr14:56333132-56333373	14.6075	0	#NAME?	down	0.00165	0.0139126	XLOC_031462
TCONS_00108802	-	chr3:29013764-29014003	14.5794	0	#NAME?	down	0.0028	0.0139126	XLOC_070290
TCONS_00113332	-	chr3:184199959-184200198	14.5794	0	#NAME?	down	0.0028	0.0139126	XLOC_073623
TCONS_00108466	-	chr3:20302935-20303186	14.5651	0	#NAME?	down	0.00245	0.0139126	XLOC_069987
TCONS_00129712	-	chr5:62888619-62888870	14.5651	0	#NAME?	down	0.00245	0.0139126	XLOC_085627
TCONS_00103041	-	chr21:42963963-42964227	14.5051	0	#NAME?	down	0.00275	0.0139126	XLOC_066542
TCONS_00018990	-	chr10:113192810-113193061	14.4867	0	#NAME?	down	0.0026	0.0139126	XLOC_012314
TCONS_00023429	-	chr11:5661819-5662063	14.4707	0	#NAME?	down	0.0022	0.0139126	XLOC_015217
TCONS_00040407	-	chr12:95805223-95805467	14.4707	0	#NAME?	down	0.0022	0.0139126	XLOC_026630
TCONS_00030713	-	chr11:80423383-80423627	14.4707	0	#NAME?	down	0.0022	0.0139126	XLOC_020012
TCONS_00045795	-	chr14:22227025-22227261	14.4458	0	#NAME?	down	0.0025	0.0139126	XLOC_030528
TCONS_00146359	-	chr6:132810659-132810895	14.4458	0	#NAME?	down	0.0025	0.0139126	XLOC_097198
TCONS_00047197	-	chr14:58729553-58729789	14.4458	0	#NAME?	down	0.0025	0.0139126	XLOC_031582
TCONS_00092217	-	chr2:28691811-28692047	14.4458	0	#NAME?	down	0.0025	0.0139126	XLOC_059079
TCONS_00144425	-	chr6:53714111-53714361	14.4353	0	#NAME?	down	0.00225	0.0139126	XLOC_095754
TCONS_00017792	-	chr10:75035527-75035781	14.2718	0	#NAME?	down	5e-05	0.00109431	XLOC_011527
TCONS_00171933	-	chr9:81036985-81037224	14.2708	0	#NAME?	down	0.0027	0.0139126	XLOC_114419
TCONS_00162733	-	chr8:134920274-134920513	14.2708	0	#NAME?	down	0.0027	0.0139126	XLOC_108027
TCONS_00145065	-	chr6:81393457-81393696	14.2708	0	#NAME?	down	0.0027	0.0139126	XLOC_096298
TCONS_00073365	-	chr18:2481018-2481254	14.2664	0	#NAME?	down	0.0024	0.0139126	XLOC_048059
TCONS_00115685	-	chr3:49346899-49347135	14.2664	0	#NAME?	down	0.0024	0.0139126	XLOC_075315
TCONS_00091590	-	chr2:3156496-3156732	14.2664	0	#NAME?	down	0.0024	0.0139126	XLOC_058667
TCONS_00065342	-	chr17:29294372-29294608	14.2664	0	#NAME?	down	0.0024	0.0139126	XLOC_043323
TCONS_00099955	-	chr20:62230968-62231204	14.2664	0	#NAME?	down	0.0024	0.0139126	XLOC_064558
TCONS_00168111	-	chr9:70420749-70420985	14.2664	0	#NAME?	down	0.0024	0.0139126	XLOC_111786
TCONS_00004011	-	chr1:111212597-111212839	14.2033	0	#NAME?	down	0.00165	0.0139126	XLOC_002551
TCONS_00115182	-	chr3:40329952-40330194	14.2033	0	#NAME?	down	0.00165	0.0139126	XLOC_075024
TCONS_00043970	-	chr13:37938264-37938506	14.2033	0	#NAME?	down	0.00165	0.0139126	XLOC_029080
TCONS_00013854	-	chr1:179824190-179824436	14.2022	0	#NAME?	down	0.00185	0.0139126	XLOC_008721
TCONS_00165851	-	chr8:122273420-122273672	14.1905	0	#NAME?	down	0.00245	0.0139126	XLOC_110208
TCONS_00156495	-	chr7:47025569-47025809	14.1732	0	#NAME?	down	0.0028	0.0139126	XLOC_103497
TCONS_00019520	-	chr10:133018450-133018690	14.1732	0	#NAME?	down	0.0028	0.0139126	XLOC_012689
TCONS_00049806	-	chr14:44772682-44772943	14.1203	0	#NAME?	down	0.00145	0.0139126	XLOC_033344
TCONS_00142734	-	chr6:11805994-11806246	14.0876	0	#NAME?	down	0.0026	0.0139126	XLOC_094699
TCONS_00150836	-	chr7:16752014-16752266	14.0876	0	#NAME?	down	0.0026	0.0139126	XLOC_099612
TCONS_00140092	-	chr6:85731668-85731918	14.0732	0	#NAME?	down	0.00205	0.0139126	XLOC_092709
TCONS_00111041	-	chr3:111458426-111458676	14.0732	0	#NAME?	down	0.00205	0.0139126	XLOC_071856
TCONS_00090881	-	chr2:225079548-225079785	14.0338	0	#NAME?	down	0.0025	0.0139126	XLOC_058252
TCONS_00124695	-	chr4:13522172-13522409	14.0338	0	#NAME?	down	0.0025	0.0139126	XLOC_081872
TCONS_00057581	-	chr15:95231516-95231779	14.0062	0	#NAME?	down	0.002	0.0139126	XLOC_038585
TCONS_00096663	-	chr2:199096314-199096569	13.9144	0	#NAME?	down	5e-05	0.00109431	XLOC_062307
TCONS_00127925	-	chr4:163334107-163334355	13.9127	0	#NAME?	down	0.00225	0.0139126	XLOC_084307
TCONS_00025454	-	chr11:66040508-66040756	13.9127	0	#NAME?	down	0.00225	0.0139126	XLOC_016585
TCONS_00139949	-	chr6:80768525-80768765	13.8702	0	#NAME?	down	0.0027	0.0139126	XLOC_092586
TCONS_00167095	-	chr9:16164029-16164266	13.8567	0	#NAME?	down	0.0024	0.0139126	XLOC_111030
TCONS_00035291	-	chr12:67367093-67367330	13.8567	0	#NAME?	down	0.0024	0.0139126	XLOC_023136
TCONS_00140981	-	chr6:122074465-122074702	13.8567	0	#NAME?	down	0.0024	0.0139126	XLOC_093441
TCONS_00142818	-	chr6:15949750-15949987	13.8567	0	#NAME?	down	0.0024	0.0139126	XLOC_094758
TCONS_00142798	-	chr6:14939867-14940111	13.8391	0	#NAME?	down	0.0016	0.0139126	XLOC_094744
TCONS_00022665	-	chr10:121247818-121248065	13.8272	0	#NAME?	down	0.00185	0.0139126	XLOC_014736
TCONS_00067673	-	chr17:83176865-83177120	13.827	0	#NAME?	down	5e-05	0.00109431	XLOC_044686
TCONS_00001500	-	chr1:32719174-32719429	13.827	0	#NAME?	down	5e-05	0.00109431	XLOC_000884
TCONS_00105395	-	chr22:29702119-29702362	13.8135	0	#NAME?	down	0.00165	0.0139126	XLOC_068181
TCONS_00170813	-	chr9:11276551-11276794	13.8135	0	#NAME?	down	0.00165	0.0139126	XLOC_113633
TCONS_00141478	-	chr6:146019262-146019505	13.8135	0	#NAME?	down	0.00165	0.0139126	XLOC_093773
TCONS_00066804	-	chr17:62701013-62701256	13.8135	0	#NAME?	down	0.00165	0.0139126	XLOC_044177
TCONS_00011073	-	chr1:88103594-88103835	13.7816	0	#NAME?	down	0.0028	0.0139126	XLOC_007011
TCONS_00046952	-	chr14:53609121-53609362	13.7816	0	#NAME?	down	0.0028	0.0139126	XLOC_031402
TCONS_00036195	-	chr12:94036618-94036859	13.7816	0	#NAME?	down	0.0028	0.0139126	XLOC_023910
TCONS_00127530	-	chr4:147196763-147197013	13.7559	0	#NAME?	down	0.00215	0.0139126	XLOC_083979
TCONS_00082102	-	chr19:55372379-55372625	13.7022	0	#NAME?	down	0.0022	0.0139126	XLOC_053056
TCONS_00095921	-	chr2:174516552-174516802	13.6583	0	#NAME?	down	0.00255	0.0139126	XLOC_061754
TCONS_00086631	-	chr2:68859030-68859294	13.6519	0	#NAME?	down	0.002	0.0139126	XLOC_055229
TCONS_00017110	-	chr10:47013270-47013508	13.6367	0	#NAME?	down	0.0025	0.0139126	XLOC_011052
TCONS_00103676	-	chr21:27515932-27516170	13.6367	0	#NAME?	down	0.0025	0.0139126	XLOC_067032
TCONS_00178853	-	chrX:38777828-38778087	13.5996	0	#NAME?	down	0.0021	0.0139126	XLOC_119246
TCONS_00177775	-	chrX:151463659-151463918	13.5996	0	#NAME?	down	0.0021	0.0139126	XLOC_118512
TCONS_00132098	-	chr5:143733708-143733957	13.5471	0	#NAME?	down	0.00225	0.0139126	XLOC_087326
TCONS_00035293	-	chr12:67375628-67375877	13.5471	0	#NAME?	down	0.00225	0.0139126	XLOC_023138
TCONS_00164501	-	chr8:73748018-73748259	13.4838	0	#NAME?	down	0.0027	0.0139126	XLOC_109230
TCONS_00152132	-	chr7:64862366-64862607	13.4838	0	#NAME?	down	0.0027	0.0139126	XLOC_100530
TCONS_00046074	-	chr14:25115066-25115307	13.4838	0	#NAME?	down	0.0027	0.0139126	XLOC_030659
TCONS_00066012	-	chr17:42678404-42678649	13.468	0	#NAME?	down	0.0016	0.0139126	XLOC_043721
TCONS_00169289	-	chr9:111624142-111624390	13.4643	0	#NAME?	down	0.00185	0.0139126	XLOC_112664
TCONS_00035637	-	chr12:74320373-74320611	13.462	0	#NAME?	down	0.0024	0.0139126	XLOC_023415
TCONS_00145446	-	chr6:92575327-92575565	13.462	0	#NAME?	down	0.0024	0.0139126	XLOC_096563
TCONS_00015165	-	chr1:228513912-228514150	13.462	0	#NAME?	down	0.0024	0.0139126	XLOC_009627
TCONS_00110741	-	chr3:97818395-97818633	13.462	0	#NAME?	down	0.0024	0.0139126	XLOC_071632
TCONS_00146920	-	chr6:155944508-155944746	13.462	0	#NAME?	down	0.0024	0.0139126	XLOC_097572
TCONS_00046547	-	chr14:39864500-39864738	13.462	0	#NAME?	down	0.0024	0.0139126	XLOC_031059
TCONS_00099811	-	chr20:59149616-59149854	13.462	0	#NAME?	down	0.0024	0.0139126	XLOC_064458
TCONS_00001508	-	chr1:32875109-32875353	13.4371	0	#NAME?	down	0.00165	0.0139126	XLOC_000889
TCONS_00153527	-	chr7:101742211-101742455	13.4371	0	#NAME?	down	0.00165	0.0139126	XLOC_101512
TCONS_00154228	-	chr7:135770503-135770747	13.4371	0	#NAME?	down	0.00165	0.0139126	XLOC_101935
TCONS_00140842	-	chr6:119924141-119924385	13.4371	0	#NAME?	down	0.00165	0.0139126	XLOC_093303
TCONS_00070798	-	chr17:71919260-71919504	13.4371	0	#NAME?	down	0.00165	0.0139126	XLOC_046541
TCONS_00151719	-	chr7:41836351-41836593	13.4033	0	#NAME?	down	0.0028	0.0139126	XLOC_100269
TCONS_00145682	-	chr6:108024659-108024901	13.4033	0	#NAME?	down	0.0028	0.0139126	XLOC_096726
TCONS_00041667	-	chr13:22076989-22077231	13.4033	0	#NAME?	down	0.0028	0.0139126	XLOC_027401
TCONS_00020937	-	chr10:52663405-52663652	13.3378	0	#NAME?	down	0.0022	0.0139126	XLOC_013593
TCONS_00013560	-	chr1:169718242-169718507	13.3091	0	#NAME?	down	0.002	0.0139126	XLOC_008504
TCONS_00014584	-	chr1:208893478-208893729	13.2795	0	#NAME?	down	0.00255	0.0139126	XLOC_009211
TCONS_00096684	-	chr2:199882960-199883211	13.2795	0	#NAME?	down	0.00255	0.0139126	XLOC_062322
TCONS_00022342	-	chr10:111620065-111620316	13.2795	0	#NAME?	down	0.00255	0.0139126	XLOC_014501
TCONS_00175250	-	chrX:37494115-37494366	13.2795	0	#NAME?	down	0.00255	0.0139126	XLOC_116776
TCONS_00020259	-	chr10:28467919-28468170	13.2795	0	#NAME?	down	0.00255	0.0139126	XLOC_013161
TCONS_00055257	-	chr15:35069803-35070042	13.254	0	#NAME?	down	0.0025	0.0139126	XLOC_037065
TCONS_00165884	-	chr8:122613083-122613322	13.254	0	#NAME?	down	0.0025	0.0139126	XLOC_110241
TCONS_00005438	-	chr1:161556384-161556623	13.254	0	#NAME?	down	0.0025	0.0139126	XLOC_003412
TCONS_00048762	-	chr14:101934528-101934801	13.2443	0	#NAME?	down	5e-05	0.00109431	XLOC_032665
TCONS_00014015	-	chr1:192389321-192389578	13.2343	0	#NAME?	down	5e-05	0.00109431	XLOC_008838
TCONS_00171876	-	chr9:76906267-76906532	13.2166	0	#NAME?	down	0.00095	0.0139126	XLOC_114367
TCONS_00003590	-	chr1:95258296-95258546	13.1936	0	#NAME?	down	0.00225	0.0139126	XLOC_002292
TCONS_00095340	-	chr2:144376312-144376562	13.1936	0	#NAME?	down	0.00225	0.0139126	XLOC_061354
TCONS_00110111	-	chr3:59053806-59054056	13.1936	0	#NAME?	down	0.00225	0.0139126	XLOC_071116
TCONS_00123706	-	chr4:182049459-182049723	13.174	0	#NAME?	down	0.00195	0.0139126	XLOC_081090
TCONS_00047777	-	chr14:73236075-73236349	13.1691	0	#NAME?	down	5e-05	0.00109431	XLOC_032008
TCONS_00072475	-	chr18:32542319-32542576	13.1548	0	#NAME?	down	5e-05	0.00109431	XLOC_047456
TCONS_00155962	-	chr7:32321750-32321999	13.1132	0	#NAME?	down	0.00185	0.0139126	XLOC_103132
TCONS_00166973	-	chr9:13512523-13512772	13.1132	0	#NAME?	down	0.00185	0.0139126	XLOC_110920
TCONS_00029682	-	chr11:60197220-60197466	13.1097	0	#NAME?	down	0.0016	0.0139126	XLOC_019454
TCONS_00057671	-	chr15:99090399-99090645	13.1097	0	#NAME?	down	0.0016	0.0139126	XLOC_038656
TCONS_00036901	-	chr12:120124402-120124641	13.0816	0	#NAME?	down	0.0024	0.0139126	XLOC_024376
TCONS_00005570	-	chr1:166181510-166181749	13.0816	0	#NAME?	down	0.0024	0.0139126	XLOC_003475
TCONS_00176254	-	chrX:66071275-66071514	13.0816	0	#NAME?	down	0.0024	0.0139126	XLOC_117515
TCONS_00169625	-	chr9:117950708-117950953	13.074	0	#NAME?	down	0.00165	0.0139126	XLOC_112939
TCONS_00108654	-	chr3:24508680-24508925	13.074	0	#NAME?	down	0.00165	0.0139126	XLOC_070159
TCONS_00043577	-	chr13:25217080-25217325	13.074	0	#NAME?	down	0.00165	0.0139126	XLOC_028810
TCONS_00056974	-	chr15:77890202-77890445	13.0383	0	#NAME?	down	0.0028	0.0139126	XLOC_038186
TCONS_00180051	-	chrX:91366357-91366600	13.0383	0	#NAME?	down	0.0028	0.0139126	XLOC_120063
TCONS_00166006	-	chr8:129273867-129274110	13.0383	0	#NAME?	down	0.0028	0.0139126	XLOC_110332
TCONS_00044918	-	chr13:76489178-76489421	13.0383	0	#NAME?	down	0.0028	0.0139126	XLOC_029829
TCONS_00098342	-	chr20:6861840-6862088	12.9851	0	#NAME?	down	0.0022	0.0139126	XLOC_063488
TCONS_00016601	-	chr10:27319566-27319814	12.9851	0	#NAME?	down	0.0022	0.0139126	XLOC_010698
TCONS_00096719	-	chr2:200525765-200526013	12.9851	0	#NAME?	down	0.0022	0.0139126	XLOC_062350
TCONS_00015376	-	chr1:234594126-234594374	12.9851	0	#NAME?	down	0.0022	0.0139126	XLOC_009786
TCONS_00178044	-	chrX:1801979-1802234	12.9722	0	#NAME?	down	0.0026	0.0139126	XLOC_118637
TCONS_00145614	-	chr6:105796226-105796477	12.9441	0	#NAME?	down	0.002	0.0139126	XLOC_096684
TCONS_00056596	-	chr15:70308864-70309116	12.9137	0	#NAME?	down	0.00255	0.0139126	XLOC_037970
TCONS_00014597	-	chr1:209528168-209528420	12.9137	0	#NAME?	down	0.00255	0.0139126	XLOC_009224
TCONS_00125744	-	chr4:81642240-81642492	12.9137	0	#NAME?	down	0.00255	0.0139126	XLOC_082571
TCONS_00129222	-	chr5:37808373-37808613	12.8848	0	#NAME?	down	0.0025	0.0139126	XLOC_085282
TCONS_00014580	-	chr1:208691474-208691714	12.8848	0	#NAME?	down	0.0025	0.0139126	XLOC_009207
TCONS_00169117	-	chr9:105986781-105987021	12.8848	0	#NAME?	down	0.0025	0.0139126	XLOC_112516
TCONS_00072477	-	chr18:32579745-32579985	12.8848	0	#NAME?	down	0.0025	0.0139126	XLOC_047458
TCONS_00141573	-	chr6:147985200-147985440	12.8848	0	#NAME?	down	0.0025	0.0139126	XLOC_093856
TCONS_00110120	-	chr3:61286688-61286928	12.8848	0	#NAME?	down	0.0025	0.0139126	XLOC_071125
TCONS_00112250	-	chr3:144317083-144317339	12.8148	0	#NAME?	down	0.00245	0.0139126	XLOC_072762
TCONS_00039591	-	chr12:66727964-66728210	12.7235	0	#NAME?	down	0.00165	0.0139126	XLOC_025994
TCONS_00160762	-	chr8:48319951-48320191	12.7143	0	#NAME?	down	0.0024	0.0139126	XLOC_106454
TCONS_00108983	-	chr3:33885186-33885426	12.7143	0	#NAME?	down	0.0024	0.0139126	XLOC_070438
TCONS_00040045	-	chr12:89114385-89114625	12.7143	0	#NAME?	down	0.0024	0.0139126	XLOC_026337
TCONS_00105270	-	chr22:26896629-26896869	12.7143	0	#NAME?	down	0.0024	0.0139126	XLOC_068092
TCONS_00157525	-	chr7:94030365-94030605	12.7143	0	#NAME?	down	0.0024	0.0139126	XLOC_104252
TCONS_00162009	-	chr8:95071843-95072083	12.7143	0	#NAME?	down	0.0024	0.0139126	XLOC_107461
TCONS_00163675	-	chr8:23491278-23491518	12.7143	0	#NAME?	down	0.0024	0.0139126	XLOC_108688
TCONS_00147153	-	chr6:159540057-159540297	12.7143	0	#NAME?	down	0.0024	0.0139126	XLOC_097785
TCONS_00129591	-	chr5:55822704-55822944	12.7143	0	#NAME?	down	0.0024	0.0139126	XLOC_085560
TCONS_00130390	-	chr5:82887026-82887266	12.7143	0	#NAME?	down	0.0024	0.0139126	XLOC_086087
TCONS_00003523	-	chr1:93849559-93849813	12.6861	0	#NAME?	down	0.00205	0.0139126	XLOC_002247
TCONS_00052970	-	chr15:45708887-45709131	12.6858	0	#NAME?	down	0.0028	0.0139126	XLOC_035459
TCONS_00159813	-	chr8:8994390-8994634	12.6858	0	#NAME?	down	0.0028	0.0139126	XLOC_105844
TCONS_00159229	-	chr7:150219287-150219531	12.6858	0	#NAME?	down	0.0028	0.0139126	XLOC_105413
TCONS_00122293	-	chr4:114248993-114249242	12.644	0	#NAME?	down	0.0022	0.0139126	XLOC_080014
TCONS_00111132	-	chr3:112717761-112718010	12.644	0	#NAME?	down	0.0022	0.0139126	XLOC_071918
TCONS_00002695	-	chr1:58766688-58766937	12.644	0	#NAME?	down	0.0022	0.0139126	XLOC_001676
TCONS_00072833	-	chr18:54801708-54801957	12.644	0	#NAME?	down	0.0022	0.0139126	XLOC_047679
TCONS_00046676	-	chr14:49978307-49978563	12.626	0	#NAME?	down	0.0026	0.0139126	XLOC_031162
TCONS_00103217	-	chr21:45404495-45404751	12.626	0	#NAME?	down	0.0026	0.0139126	XLOC_066674
TCONS_00039723	-	chr12:68361117-68361373	12.626	0	#NAME?	down	0.0026	0.0139126	XLOC_026119
TCONS_00156542	-	chr7:48084982-48085232	12.623	0	#NAME?	down	0.0017	0.0139126	XLOC_103531
TCONS_00008951	-	chr1:23552194-23552447	12.5606	0	#NAME?	down	0.00255	0.0139126	XLOC_005624
TCONS_00042140	-	chr13:42334506-42334759	12.5606	0	#NAME?	down	0.00255	0.0139126	XLOC_027753
TCONS_00065010	-	chr17:16510434-16510687	12.5606	0	#NAME?	down	0.00255	0.0139126	XLOC_043109
TCONS_00123302	-	chr4:155614385-155614626	12.5287	0	#NAME?	down	0.0025	0.0139126	XLOC_080798
TCONS_00041669	-	chr13:22084657-22084898	12.5287	0	#NAME?	down	0.0025	0.0139126	XLOC_027403
TCONS_00134984	-	chr5:100755355-100755596	12.5287	0	#NAME?	down	0.0025	0.0139126	XLOC_089292
TCONS_00179075	-	chrX:48652113-48652354	12.5287	0	#NAME?	down	0.0025	0.0139126	XLOC_119395
TCONS_00075821	-	chr19:16106038-16106295	12.4991	0	#NAME?	down	0.00245	0.0139126	XLOC_049637
TCONS_00106194	-	chr22:47377230-47377487	12.4991	0	#NAME?	down	0.00245	0.0139126	XLOC_068656
TCONS_00127728	-	chr4:157571188-157571454	12.4176	0	#NAME?	down	5e-05	0.00109431	XLOC_084126
TCONS_00136112	-	chr5:140094681-140094935	12.4077	0	#NAME?	down	0.00215	0.0139126	XLOC_090139
TCONS_00067658	-	chr17:83116107-83116351	12.4035	0	#NAME?	down	0.0027	0.0139126	XLOC_044671
TCONS_00062551	-	chr16:55428630-55428874	12.4035	0	#NAME?	down	0.0027	0.0139126	XLOC_041456
TCONS_00014989	-	chr1:223936564-223936808	12.4035	0	#NAME?	down	0.0027	0.0139126	XLOC_009512
TCONS_00133226	-	chr5:6203019-6203263	12.4035	0	#NAME?	down	0.0027	0.0139126	XLOC_088042
TCONS_00069025	-	chr17:32485395-32485670	12.39	0	#NAME?	down	0.0001	0.00197988	XLOC_045483
TCONS_00101432	-	chr20:44866020-44866267	12.3851	0	#NAME?	down	0.00165	0.0139126	XLOC_065483
TCONS_00059927	-	chr16:57091245-57091492	12.3851	0	#NAME?	down	0.00165	0.0139126	XLOC_039912
TCONS_00095649	-	chr2:161068312-161068559	12.3851	0	#NAME?	down	0.00165	0.0139126	XLOC_061561
TCONS_00028743	-	chr11:11722689-11722930	12.3602	0	#NAME?	down	0.0024	0.0139126	XLOC_018839
TCONS_00128614	-	chr5:1115182-1115450	12.3468	0	#NAME?	down	0.002	0.0139126	XLOC_084800
TCONS_00019522	-	chr10:133028733-133028978	12.3457	0	#NAME?	down	0.0028	0.0139126	XLOC_012691
TCONS_00045232	-	chr13:95661189-95661434	12.3457	0	#NAME?	down	0.0028	0.0139126	XLOC_030095
TCONS_00019408	-	chr10:128235713-128235958	12.3457	0	#NAME?	down	0.0028	0.0139126	XLOC_012610
TCONS_00093295	-	chr2:63763746-63763991	12.3457	0	#NAME?	down	0.0028	0.0139126	XLOC_059941
TCONS_00072943	-	chr18:62415923-62416189	12.3216	0	#NAME?	down	0.00155	0.0139126	XLOC_047751
TCONS_00124065	-	chr4:833142-833392	12.314	0	#NAME?	down	0.0022	0.0139126	XLOC_081369
TCONS_00073709	-	chr18:22927092-22927342	12.314	0	#NAME?	down	0.0022	0.0139126	XLOC_048310
TCONS_00038604	-	chr12:48018399-48018659	12.3013	0	#NAME?	down	0.0016	0.0139126	XLOC_025396
TCONS_00156903	-	chr7:73881069-73881326	12.2917	0	#NAME?	down	0.0026	0.0139126	XLOC_103774
TCONS_00012990	-	chr1:156003986-156004240	12.2198	0	#NAME?	down	0.00255	0.0139126	XLOC_008179
TCONS_00134705	-	chr5:88689764-88690018	12.2198	0	#NAME?	down	0.00255	0.0139126	XLOC_089092
TCONS_00117063	-	chr3:116477165-116477418	12.2017	0	#NAME?	down	0.00225	0.0139126	XLOC_076308
TCONS_00044089	-	chr13:39202907-39203152	12.185	0	#NAME?	down	0.00265	0.0139126	XLOC_029192
TCONS_00074493	-	chr18:61199919-61200161	12.1848	0	#NAME?	down	0.0025	0.0139126	XLOC_048854
TCONS_00029638	-	chr11:59245999-59246241	12.1848	0	#NAME?	down	0.0025	0.0139126	XLOC_019424
TCONS_00112117	-	chr3:143254294-143254536	12.1848	0	#NAME?	down	0.0025	0.0139126	XLOC_072630
TCONS_00071018	-	chr17:75312206-75312448	12.1848	0	#NAME?	down	0.0025	0.0139126	XLOC_046657
TCONS_00065392	-	chr17:30553390-30553639	12.1045	0	#NAME?	down	0.0016	0.0139126	XLOC_043348
TCONS_00089960	-	chr2:193615154-193615399	12.0683	0	#NAME?	down	0.0027	0.0139126	XLOC_057609
TCONS_00155842	-	chr7:27473967-27474212	12.0683	0	#NAME?	down	0.0027	0.0139126	XLOC_103060
TCONS_00172379	-	chr9:92185498-92185743	12.0683	0	#NAME?	down	0.0027	0.0139126	XLOC_114794
TCONS_00127148	-	chr4:138850379-138850624	12.0683	0	#NAME?	down	0.0027	0.0139126	XLOC_083668
TCONS_00017354	-	chr10:61835635-61835891	12.061	0	#NAME?	down	0.00205	0.0139126	XLOC_011237
TCONS_00098063	-	chr2:173894216-173894489	12.0593	0	#NAME?	down	0.001	0.0139126	XLOC_063319
TCONS_00178848	-	chrX:38256142-38256390	12.0576	0	#NAME?	down	0.00165	0.0139126	XLOC_119243
TCONS_00112328	-	chr3:147664045-147664293	12.0576	0	#NAME?	down	0.00165	0.0139126	XLOC_072834
TCONS_00178803	-	chrX:36868972-36869220	12.0576	0	#NAME?	down	0.00165	0.0139126	XLOC_119203
TCONS_00023377	-	chr11:4467709-4467967	12.0321	0	#NAME?	down	0.00285	0.0140291	XLOC_015174
TCONS_00107633	-	chr22:49768659-49768901	12.0182	0	#NAME?	down	0.0024	0.0139126	XLOC_069493
TCONS_00046633	-	chr14:45473197-45473439	12.0182	0	#NAME?	down	0.0024	0.0139126	XLOC_031131
TCONS_00089949	-	chr2:191919340-191919582	12.0182	0	#NAME?	down	0.0024	0.0139126	XLOC_057598
TCONS_00009928	-	chr1:45583622-45583864	12.0182	0	#NAME?	down	0.0024	0.0139126	XLOC_006208
TCONS_00093506	-	chr2:67513758-67514000	12.0182	0	#NAME?	down	0.0024	0.0139126	XLOC_060133
TCONS_00161848	-	chr8:90534244-90534486	12.0182	0	#NAME?	down	0.0024	0.0139126	XLOC_107351
TCONS_00132869	-	chr5:177130106-177130348	12.0182	0	#NAME?	down	0.0024	0.0139126	XLOC_087796
TCONS_00098488	-	chr20:11159735-11159977	12.0182	0	#NAME?	down	0.0024	0.0139126	XLOC_063613
TCONS_00068567	-	chr17:15416350-15416596	12.0172	0	#NAME?	down	0.0028	0.0139126	XLOC_045229
TCONS_00135646	-	chr5:127229871-127230117	12.0172	0	#NAME?	down	0.0028	0.0139126	XLOC_089849
TCONS_00053680	-	chr15:69574969-69575232	12.015	0	#NAME?	down	0.00225	0.0139126	XLOC_035968
TCONS_00162578	-	chr8:126961960-126962211	11.9947	0	#NAME?	down	0.0022	0.0139126	XLOC_107892
TCONS_00150345	-	chr7:1168230-1168481	11.9947	0	#NAME?	down	0.0022	0.0139126	XLOC_099247
TCONS_00006231	-	chr1:187390379-187390626	11.9885	0	#NAME?	down	0.0025	0.0139126	XLOC_003932
TCONS_00126736	-	chr4:118024803-118025064	11.9844	0	#NAME?	down	0.0016	0.0139126	XLOC_083313
TCONS_00156602	-	chr7:55363341-55363599	11.9688	0	#NAME?	down	0.0026	0.0139126	XLOC_103560
TCONS_00110583	-	chr3:76989076-76989334	11.9688	0	#NAME?	down	0.0026	0.0139126	XLOC_071521
TCONS_00110339	-	chr3:76166224-76166488	11.9454	0	#NAME?	down	0.0021	0.0139126	XLOC_071280
TCONS_00049738	-	chr14:38705890-38706149	11.8965	0	#NAME?	down	0.00245	0.0139126	XLOC_033286
TCONS_00151031	-	chr7:19786933-19787187	11.8932	0	#NAME?	down	0.00225	0.0139126	XLOC_099792
TCONS_00007969	-	chr1:247926992-247927246	11.8932	0	#NAME?	down	0.00225	0.0139126	XLOC_005073
TCONS_00013905	-	chr1:181995563-181995818	11.8912	0	#NAME?	down	0.00255	0.0139126	XLOC_008761
TCONS_00021416	-	chr10:76683620-76683875	11.8912	0	#NAME?	down	0.00255	0.0139126	XLOC_013907
TCONS_00073768	-	chr18:25990198-25990453	11.8912	0	#NAME?	down	0.00255	0.0139126	XLOC_048354
TCONS_00162125	-	chr8:102637656-102637911	11.8912	0	#NAME?	down	0.00255	0.0139126	XLOC_107539
TCONS_00042262	-	chr13:45043660-45043926	11.8787	0	#NAME?	down	0.00155	0.0139126	XLOC_027849
TCONS_00167138	-	chr9:18206617-18206863	11.8585	0	#NAME?	down	0.00265	0.0139126	XLOC_111067
TCONS_00136357	-	chr5:145365586-145365829	11.853	0	#NAME?	down	0.0025	0.0139126	XLOC_090296
TCONS_00017318	-	chr10:59067348-59067591	11.853	0	#NAME?	down	0.0025	0.0139126	XLOC_011215
TCONS_00080527	-	chr19:35692273-35692516	11.853	0	#NAME?	down	0.0025	0.0139126	XLOC_052297
TCONS_00064930	-	chr17:15822765-15823008	11.853	0	#NAME?	down	0.0025	0.0139126	XLOC_043078
TCONS_00028578	-	chr11:8176539-8176805	11.8263	0	#NAME?	down	0.0001	0.00197988	XLOC_018721
TCONS_00036886	-	chr12:119214860-119215113	11.8185	0	#NAME?	down	0.00185	0.0139126	XLOC_024368
TCONS_00040644	-	chr12:106182457-106182700	11.8111	0	#NAME?	down	0.0029	0.0142149	XLOC_026787
TCONS_00080878	-	chr19:40182793-40183043	11.7907	0	#NAME?	down	0.0016	0.0139126	XLOC_052470
TCONS_00010918	-	chr1:83559004-83559261	11.7638	0	#NAME?	down	0.00205	0.0139126	XLOC_006920
TCONS_00010674	-	chr1:74681044-74681299	11.7463	0	#NAME?	down	0.00225	0.0139126	XLOC_006706
TCONS_00073603	-	chr18:12771753-12771999	11.7448	0	#NAME?	down	0.0027	0.0139126	XLOC_048231
TCONS_00150656	-	chr7:8092758-8093004	11.7448	0	#NAME?	down	0.0027	0.0139126	XLOC_099457
TCONS_00117907	-	chr3:145536829-145537088	11.7412	0	#NAME?	down	0.00285	0.0140291	XLOC_076842
TCONS_00116932	-	chr3:111005739-111005998	11.7412	0	#NAME?	down	0.00285	0.0140291	XLOC_076224
TCONS_00087257	-	chr2:94590999-94591248	11.7409	0	#NAME?	down	0.00165	0.0139126	XLOC_055684
TCONS_00055756	-	chr15:49752583-49752832	11.7409	0	#NAME?	down	0.00165	0.0139126	XLOC_037399
TCONS_00156880	-	chr7:73672159-73672408	11.7409	0	#NAME?	down	0.00165	0.0139126	XLOC_103766
TCONS_00026956	-	chr11:102995270-102995519	11.7409	0	#NAME?	down	0.00165	0.0139126	XLOC_017678
TCONS_00074201	-	chr18:49008953-49009202	11.7409	0	#NAME?	down	0.00165	0.0139126	XLOC_048649
TCONS_00074184	-	chr18:48538161-48538410	11.7409	0	#NAME?	down	0.00165	0.0139126	XLOC_048636
TCONS_00016803	-	chr10:31973397-31973666	11.7387	0	#NAME?	down	5e-05	0.00109431	XLOC_010865
TCONS_00113392	-	chr3:184603870-184604117	11.7	0	#NAME?	down	0.0028	0.0139126	XLOC_073652
TCONS_00019060	-	chr10:113810226-113810473	11.7	0	#NAME?	down	0.0028	0.0139126	XLOC_012365
TCONS_00113860	-	chr3:3251047-3251294	11.7	0	#NAME?	down	0.0028	0.0139126	XLOC_073991
TCONS_00097149	-	chr2:216666447-216666690	11.6883	0	#NAME?	down	0.0024	0.0139126	XLOC_062643
TCONS_00026950	-	chr11:102977833-102978076	11.6883	0	#NAME?	down	0.0024	0.0139126	XLOC_017672
TCONS_00140288	-	chr6:101205350-101205593	11.6883	0	#NAME?	down	0.0024	0.0139126	XLOC_092859
TCONS_00118804	-	chr3:178221525-178221768	11.6883	0	#NAME?	down	0.0024	0.0139126	XLOC_077537
TCONS_00162107	-	chr8:100954224-100954467	11.6883	0	#NAME?	down	0.0024	0.0139126	XLOC_107521
TCONS_00071225	-	chr17:79728852-79729104	11.6863	0	#NAME?	down	0.0022	0.0139126	XLOC_046773
TCONS_00178652	-	chrX:24307166-24307418	11.6863	0	#NAME?	down	0.0022	0.0139126	XLOC_119085
TCONS_00151829	-	chr7:44959411-44959663	11.6863	0	#NAME?	down	0.0022	0.0139126	XLOC_100343
TCONS_00134212	-	chr5:65128485-65128744	11.6568	0	#NAME?	down	0.0026	0.0139126	XLOC_088756
TCONS_00014067	-	chr1:192805744-192806003	11.6568	0	#NAME?	down	0.0026	0.0139126	XLOC_008890
TCONS_00171925	-	chr9:80957662-80957936	11.6487	0	#NAME?	down	0.0011	0.0139126	XLOC_114411
TCONS_00047012	-	chr14:55459484-55459739	11.5953	0	#NAME?	down	0.00225	0.0139126	XLOC_031443
TCONS_00127741	-	chr4:157649127-157649395	11.5751	0	#NAME?	down	0.0022	0.0139126	XLOC_084139
TCONS_00180362	-	chrX:113951029-113951285	11.5738	0	#NAME?	down	0.00255	0.0139126	XLOC_120243
TCONS_00016476	-	chr10:23361305-23361561	11.5738	0	#NAME?	down	0.00255	0.0139126	XLOC_010597
TCONS_00127171	-	chr4:138912584-138912840	11.5738	0	#NAME?	down	0.00255	0.0139126	XLOC_083691
TCONS_00155533	-	chr7:19814419-19814675	11.5738	0	#NAME?	down	0.00255	0.0139126	XLOC_102821
TCONS_00123688	-	chr4:177588990-177589246	11.5738	0	#NAME?	down	0.00255	0.0139126	XLOC_081072
TCONS_00011204	-	chr1:91549003-91549259	11.5738	0	#NAME?	down	0.00255	0.0139126	XLOC_007114
TCONS_00169211	-	chr9:107387493-107387749	11.5738	0	#NAME?	down	0.00255	0.0139126	XLOC_112604
TCONS_00005699	-	chr1:170766661-170766937	11.5631	0	#NAME?	down	0.0016	0.0139126	XLOC_003568
TCONS_00098611	-	chr20:13321427-13321705	11.556	0	#NAME?	down	0.0001	0.00197988	XLOC_063718
TCONS_00173368	-	chr9:115699274-115699518	11.5326	0	#NAME?	down	0.0025	0.0139126	XLOC_115550
TCONS_00029163	-	chr11:31211370-31211614	11.5326	0	#NAME?	down	0.0025	0.0139126	XLOC_019128
TCONS_00135454	-	chr5:115775569-115775823	11.5214	0	#NAME?	down	0.00185	0.0139126	XLOC_089693
TCONS_00152225	-	chr7:65837487-65837766	11.4926	0	#NAME?	down	5e-05	0.00109431	XLOC_100606
TCONS_00015764	-	chr1:145861103-145861354	11.4869	0	#NAME?	down	0.0016	0.0139126	XLOC_010070
TCONS_00145066	-	chr6:81394832-81395083	11.4869	0	#NAME?	down	0.0016	0.0139126	XLOC_096299
TCONS_00172077	-	chr9:86176246-86176497	11.4869	0	#NAME?	down	0.0016	0.0139126	XLOC_114524
TCONS_00155294	-	chr7:7541234-7541485	11.4869	0	#NAME?	down	0.0016	0.0139126	XLOC_102636
TCONS_00032968	-	chr12:8342945-8343203	11.4758	0	#NAME?	down	0.00205	0.0139126	XLOC_021499
TCONS_00110688	-	chr3:88209320-88209577	11.4496	0	#NAME?	down	0.0014	0.0139126	XLOC_071607
TCONS_00040401	-	chr12:95638814-95639064	11.4344	0	#NAME?	down	0.00165	0.0139126	XLOC_026624
TCONS_00143416	-	chr6:30802847-30803097	11.4344	0	#NAME?	down	0.00165	0.0139126	XLOC_095185
TCONS_00176806	-	chrX:97617659-97617909	11.4344	0	#NAME?	down	0.00165	0.0139126	XLOC_117921
TCONS_00064023	-	chr16:87517504-87517751	11.4324	0	#NAME?	down	0.0027	0.0139126	XLOC_042565
TCONS_00076064	-	chr19:19513773-19514020	11.4324	0	#NAME?	down	0.0027	0.0139126	XLOC_049767
TCONS_00013656	-	chr1:173100391-173100638	11.4324	0	#NAME?	down	0.0027	0.0139126	XLOC_008578
TCONS_00129668	-	chr5:61559101-61559348	11.4324	0	#NAME?	down	0.0027	0.0139126	XLOC_085597
TCONS_00038073	-	chr12:22411595-22411842	11.4324	0	#NAME?	down	0.0027	0.0139126	XLOC_025041
TCONS_00036423	-	chr12:102759753-102760001	11.3929	0	#NAME?	down	0.0028	0.0139126	XLOC_024054
TCONS_00019316	-	chr10:123359747-123359995	11.3929	0	#NAME?	down	0.0028	0.0139126	XLOC_012549
TCONS_00099231	-	chr20:38382179-38382423	11.3699	0	#NAME?	down	0.0024	0.0139126	XLOC_064134
TCONS_00142902	-	chr6:19719520-19719764	11.3699	0	#NAME?	down	0.0024	0.0139126	XLOC_094827
TCONS_00057471	-	chr15:92601978-92602222	11.3699	0	#NAME?	down	0.0024	0.0139126	XLOC_038497
TCONS_00162434	-	chr8:122132953-122133197	11.3699	0	#NAME?	down	0.0024	0.0139126	XLOC_107778
TCONS_00153817	-	chr7:116269163-116269407	11.3699	0	#NAME?	down	0.0024	0.0139126	XLOC_101684
TCONS_00064158	-	chr16:89641625-89641869	11.3699	0	#NAME?	down	0.0024	0.0139126	XLOC_042656
TCONS_00085307	-	chr2:21933750-21933994	11.3699	0	#NAME?	down	0.0024	0.0139126	XLOC_054296
TCONS_00132426	-	chr5:155862707-155862951	11.3699	0	#NAME?	down	0.0024	0.0139126	XLOC_087536
TCONS_00164315	-	chr8:66338757-66339001	11.3699	0	#NAME?	down	0.0024	0.0139126	XLOC_109096
TCONS_00024702	-	chr11:46125286-46125530	11.3699	0	#NAME?	down	0.0024	0.0139126	XLOC_016177
TCONS_00086396	-	chr2:62576803-62577059	11.3645	0	#NAME?	down	0.0029	0.0142149	XLOC_055034
TCONS_00174648	-	chrX:4708798-4709064	11.3554	0	#NAME?	down	0.0021	0.0139126	XLOC_116330
TCONS_00157116	-	chr7:83876592-83876852	11.3551	0	#NAME?	down	0.0026	0.0139126	XLOC_103926
TCONS_00039500	-	chr12:63429324-63429584	11.3551	0	#NAME?	down	0.0026	0.0139126	XLOC_025929
TCONS_00126442	-	chr4:104882895-104883156	11.3287	0	#NAME?	down	0.00245	0.0139126	XLOC_083086
TCONS_00142849	-	chr6:18990445-18990701	11.3072	0	#NAME?	down	0.00225	0.0139126	XLOC_094774
TCONS_00074998	-	chr19:3481967-3482235	11.2886	0	#NAME?	down	0.0001	0.00197988	XLOC_049172
TCONS_00105290	-	chr22:26961437-26961701	11.279	0	#NAME?	down	0.0016	0.0139126	XLOC_068112
TCONS_00007653	-	chr1:235076702-235076959	11.2674	0	#NAME?	down	0.00255	0.0139126	XLOC_004835
TCONS_00016783	-	chr10:31698802-31699059	11.2674	0	#NAME?	down	0.00255	0.0139126	XLOC_010845
TCONS_00158330	-	chr7:118088064-118088319	11.2344	0	#NAME?	down	0.00185	0.0139126	XLOC_104791
TCONS_00052159	-	chr15:24811128-24811386	11.23	0	#NAME?	down	0.00215	0.0139126	XLOC_034930
TCONS_00057037	-	chr15:79757670-79757915	11.2233	0	#NAME?	down	0.0025	0.0139126	XLOC_038224
TCONS_00176950	-	chrX:103380480-103380725	11.2233	0	#NAME?	down	0.0025	0.0139126	XLOC_117989
TCONS_00085299	-	chr2:21554475-21554734	11.1967	0	#NAME?	down	0.00205	0.0139126	XLOC_054288
TCONS_00114794	-	chr3:22163186-22163438	11.1932	0	#NAME?	down	0.0016	0.0139126	XLOC_074738
TCONS_00176659	-	chrX:79254365-79254617	11.1932	0	#NAME?	down	0.0016	0.0139126	XLOC_117810
TCONS_00097421	-	chr2:226386406-226386658	11.1932	0	#NAME?	down	0.0016	0.0139126	XLOC_062809
TCONS_00161471	-	chr8:75419389-75419678	11.1696	0	#NAME?	down	5e-05	0.00109431	XLOC_107019
TCONS_00053214	-	chr15:56470818-56471082	11.1588	0	#NAME?	down	5e-05	0.00109431	XLOC_035644
TCONS_00165015	-	chr8:89546914-89547165	11.138	0	#NAME?	down	0.00165	0.0139126	XLOC_109631
TCONS_00144349	-	chr6:50942987-50943238	11.138	0	#NAME?	down	0.00165	0.0139126	XLOC_095701
TCONS_00030588	-	chr11:76328983-76329234	11.138	0	#NAME?	down	0.00165	0.0139126	XLOC_019934
TCONS_00096031	-	chr2:177037366-177037614	11.1301	0	#NAME?	down	0.0027	0.0139126	XLOC_061809
TCONS_00135676	-	chr5:127889729-127889977	11.1301	0	#NAME?	down	0.0027	0.0139126	XLOC_089879
TCONS_00039085	-	chr12:55893461-55893709	11.1301	0	#NAME?	down	0.0027	0.0139126	XLOC_025650
TCONS_00180682	-	chrX:129219035-129219283	11.1301	0	#NAME?	down	0.0027	0.0139126	XLOC_120498
TCONS_00047533	-	chr14:68689140-68689388	11.1301	0	#NAME?	down	0.0027	0.0139126	XLOC_031835
TCONS_00130418	-	chr5:83900739-83900993	11.1003	0	#NAME?	down	0.0022	0.0139126	XLOC_086108
TCONS_00169631	-	chr9:118057183-118057432	11.0958	0	#NAME?	down	0.0028	0.0139126	XLOC_112945
TCONS_00180888	-	chrX:134172242-134172491	11.0958	0	#NAME?	down	0.0028	0.0139126	XLOC_120643
TCONS_00140789	-	chr6:119784790-119785039	11.0958	0	#NAME?	down	0.0028	0.0139126	XLOC_093250
TCONS_00013605	-	chr1:171065845-171066105	11.0917	0	#NAME?	down	0.00245	0.0139126	XLOC_008540
TCONS_00079900	-	chr19:18374100-18374371	11.0702	0	#NAME?	down	5e-05	0.00109431	XLOC_051867
TCONS_00115594	-	chr3:48595924-48596169	11.0626	0	#NAME?	down	0.0024	0.0139126	XLOC_075278
TCONS_00126783	-	chr4:119692966-119693211	11.0626	0	#NAME?	down	0.0024	0.0139126	XLOC_083351
TCONS_00082020	-	chr19:54375175-54375420	11.0626	0	#NAME?	down	0.0024	0.0139126	XLOC_053020
TCONS_00168267	-	chr9:75718683-75718928	11.0626	0	#NAME?	down	0.0024	0.0139126	XLOC_111923
TCONS_00096656	-	chr2:198763046-198763291	11.0626	0	#NAME?	down	0.0024	0.0139126	XLOC_062300
TCONS_00074705	-	chr18:76337354-76337599	11.0626	0	#NAME?	down	0.0024	0.0139126	XLOC_049019
TCONS_00065262	-	chr17:27327681-27327926	11.0626	0	#NAME?	down	0.0024	0.0139126	XLOC_043259
TCONS_00005890	-	chr1:178603725-178603987	11.0575	0	#NAME?	down	0.00245	0.0139126	XLOC_003688
TCONS_00072670	-	chr18:45709677-45709946	11.0322	0	#NAME?	down	0.0001	0.00197988	XLOC_047565
TCONS_00085214	-	chr2:19004787-19005044	11.0286	0	#NAME?	down	0.00225	0.0139126	XLOC_054211
TCONS_00021457	-	chr10:77949754-77950011	11.0286	0	#NAME?	down	0.00225	0.0139126	XLOC_013938
TCONS_00136603	-	chr5:150979436-150979693	11.0286	0	#NAME?	down	0.00225	0.0139126	XLOC_090456
TCONS_00018008	-	chr10:80666089-80666346	11.0286	0	#NAME?	down	0.00225	0.0139126	XLOC_011665
TCONS_00087730	-	chr2:105996811-105997069	10.9714	0	#NAME?	down	0.00255	0.0139126	XLOC_056003
TCONS_00007145	-	chr1:220901650-220901909	10.9584	0	#NAME?	down	0.00215	0.0139126	XLOC_004489
TCONS_00164314	-	chr8:66292210-66292483	10.9377	0	#NAME?	down	0.002	0.0139126	XLOC_109095
TCONS_00089296	-	chr2:172660446-172660706	10.9257	0	#NAME?	down	0.00205	0.0139126	XLOC_057105
TCONS_00054376	-	chr15:84967228-84967474	10.9247	0	#NAME?	down	0.0025	0.0139126	XLOC_036423
TCONS_00072644	-	chr18:44159978-44160224	10.9247	0	#NAME?	down	0.0025	0.0139126	XLOC_047547
TCONS_00080008	-	chr19:19996796-19997042	10.9247	0	#NAME?	down	0.0025	0.0139126	XLOC_051907
TCONS_00098846	-	chr20:23059344-23059590	10.9247	0	#NAME?	down	0.0025	0.0139126	XLOC_063889
TCONS_00033962	-	chr12:26184484-26184730	10.9247	0	#NAME?	down	0.0025	0.0139126	XLOC_022285
TCONS_00085738	-	chr2:37625004-37625283	10.9038	0	#NAME?	down	5e-05	0.00109431	XLOC_054541
TCONS_00096511	-	chr2:190732069-190732334	10.8972	0	#NAME?	down	5e-05	0.00109431	XLOC_062189
TCONS_00030903	-	chr11:88235861-88236131	10.8716	0	#NAME?	down	0.0001	0.00197988	XLOC_020148
TCONS_00180922	-	chrX:135005691-135005963	10.8633	0	#NAME?	down	5e-05	0.00109431	XLOC_120659
TCONS_00122404	-	chr4:120142232-120142484	10.8516	0	#NAME?	down	0.00165	0.0139126	XLOC_080104
TCONS_00027489	-	chr11:119600755-119601007	10.8516	0	#NAME?	down	0.00165	0.0139126	XLOC_018006
TCONS_00064214	-	chr16:72246932-72247184	10.8516	0	#NAME?	down	0.00165	0.0139126	XLOC_042700
TCONS_00058529	-	chr16:4623810-4624075	10.8443	0	#NAME?	down	5e-05	0.00109431	XLOC_039087
TCONS_00040617	-	chr12:105979911-105980180	10.8386	0	#NAME?	down	0.0011	0.0139126	XLOC_026762
TCONS_00147131	-	chr6:159493082-159493331	10.8377	0	#NAME?	down	0.0027	0.0139126	XLOC_097763
TCONS_00122560	-	chr4:123598739-123598988	10.8377	0	#NAME?	down	0.0027	0.0139126	XLOC_080233
TCONS_00100569	-	chr20:7694930-7695179	10.8377	0	#NAME?	down	0.0027	0.0139126	XLOC_064946
TCONS_00100036	-	chr20:63539415-63539664	10.8377	0	#NAME?	down	0.0027	0.0139126	XLOC_064605
TCONS_00097558	-	chr2:229315880-229316135	10.8223	0	#NAME?	down	0.0022	0.0139126	XLOC_062932
TCONS_00064112	-	chr16:88869217-88869467	10.8082	0	#NAME?	down	0.0028	0.0139126	XLOC_042621
TCONS_00058694	-	chr16:11587552-11587802	10.8082	0	#NAME?	down	0.0028	0.0139126	XLOC_039187
TCONS_00085080	-	chr2:18653113-18653359	10.766	0	#NAME?	down	0.0024	0.0139126	XLOC_054078
TCONS_00140390	-	chr6:108743216-108743462	10.766	0	#NAME?	down	0.0024	0.0139126	XLOC_092927
TCONS_00084885	-	chr2:7355689-7355935	10.766	0	#NAME?	down	0.0024	0.0139126	XLOC_053939
TCONS_00091984	-	chr2:19568687-19568933	10.766	0	#NAME?	down	0.0024	0.0139126	XLOC_058960
TCONS_00095798	-	chr2:170906107-170906365	10.7585	0	#NAME?	down	0.00225	0.0139126	XLOC_061654
TCONS_00094350	-	chr2:101218737-101219009	10.7556	0	#NAME?	down	0.0014	0.0139126	XLOC_060648
TCONS_00125295	-	chr4:52831102-52831370	10.7461	0	#NAME?	down	5e-05	0.00109431	XLOC_082278
TCONS_00049196	-	chr14:22212388-22212648	10.6949	0	#NAME?	down	0.00215	0.0139126	XLOC_032914
TCONS_00122296	-	chr4:114474796-114475053	10.6883	0	#NAME?	down	0.00185	0.0139126	XLOC_080017
TCONS_00124967	-	chr4:24782675-24782932	10.6883	0	#NAME?	down	0.00185	0.0139126	XLOC_082072
TCONS_00120227	-	chr4:14217164-14217421	10.6883	0	#NAME?	down	0.00185	0.0139126	XLOC_078493
TCONS_00137796	-	chr6:5949819-5950078	10.6854	0	#NAME?	down	0.00255	0.0139126	XLOC_091247
TCONS_00171927	-	chr9:80966162-80966436	10.6817	0	#NAME?	down	0.002	0.0139126	XLOC_114413
TCONS_00164779	-	chr8:78235937-78236200	10.6598	0	#NAME?	down	0.00285	0.0140291	XLOC_109471
TCONS_00120864	-	chr4:48442628-48442891	10.6598	0	#NAME?	down	0.00285	0.0140291	XLOC_078957
TCONS_00181439	-	chrX:3906119-3906382	10.6587	0	#NAME?	down	0.0018	0.0139126	XLOC_120961
TCONS_00034326	-	chr12:44391839-44392086	10.6363	0	#NAME?	down	0.0025	0.0139126	XLOC_022523
TCONS_00128675	-	chr5:2194145-2194392	10.6363	0	#NAME?	down	0.0025	0.0139126	XLOC_084854
TCONS_00112979	-	chr3:168887132-168887379	10.6363	0	#NAME?	down	0.0025	0.0139126	XLOC_073367
TCONS_00127136	-	chr4:138794046-138794293	10.6363	0	#NAME?	down	0.0025	0.0139126	XLOC_083656
TCONS_00159032	-	chr7:144154567-144154821	10.6351	0	#NAME?	down	0.0016	0.0139126	XLOC_105250
TCONS_00103516	-	chr21:14883129-14883388	10.5798	0	#NAME?	down	0.0029	0.0142149	XLOC_066915
TCONS_00050073	-	chr14:55535797-55536050	10.5748	0	#NAME?	down	0.00165	0.0139126	XLOC_033527
TCONS_00098564	-	chr20:12267823-12268076	10.5748	0	#NAME?	down	0.00165	0.0139126	XLOC_063678
TCONS_00040690	-	chr12:108512556-108512806	10.5549	0	#NAME?	down	0.0027	0.0139126	XLOC_026824
TCONS_00182030	-	chrY:18867953-18868203	10.5549	0	#NAME?	down	0.0027	0.0139126	XLOC_121332
TCONS_00171919	-	chr9:78221452-78221702	10.5549	0	#NAME?	down	0.0027	0.0139126	XLOC_114405
TCONS_00010879	-	chr1:83401103-83401353	10.5549	0	#NAME?	down	0.0027	0.0139126	XLOC_006881
TCONS_00179223	-	chrX:51337862-51338112	10.5549	0	#NAME?	down	0.0027	0.0139126	XLOC_119489
TCONS_00072788	-	chr18:51122669-51122925	10.5534	0	#NAME?	down	0.0022	0.0139126	XLOC_047649
TCONS_00167960	-	chr9:64482427-64482683	10.5534	0	#NAME?	down	0.0022	0.0139126	XLOC_111675
TCONS_00120648	-	chr4:39159526-39159792	10.5443	0	#NAME?	down	0.0016	0.0139126	XLOC_078803
TCONS_00126122	-	chr4:87559255-87559521	10.5443	0	#NAME?	down	0.0016	0.0139126	XLOC_082864
TCONS_00084888	-	chr2:7391715-7391979	10.5388	0	#NAME?	down	0.00245	0.0139126	XLOC_053942
TCONS_00165330	-	chr8:98988311-98988562	10.5296	0	#NAME?	down	0.0028	0.0139126	XLOC_109838
TCONS_00086745	-	chr2:71451210-71451461	10.5296	0	#NAME?	down	0.0028	0.0139126	XLOC_055319
TCONS_00003996	-	chr1:110701889-110702140	10.5296	0	#NAME?	down	0.0028	0.0139126	XLOC_002541
TCONS_00016954	-	chr10:38426107-38426358	10.5296	0	#NAME?	down	0.0028	0.0139126	XLOC_010947
TCONS_00125199	-	chr4:47017157-47017420	10.5047	0	#NAME?	down	0.0026	0.0139126	XLOC_082223
TCONS_00098816	-	chr20:21762026-21937023	10.4931	0	#NAME?	down	0.00015	0.00279523	XLOC_063859
TCONS_00096163	-	chr2:182137515-182137775	10.4861	0	#NAME?	down	0.00215	0.0139126	XLOC_061892
TCONS_00168368	-	chr9:78041257-78041504	10.4797	0	#NAME?	down	0.0024	0.0139126	XLOC_111995
TCONS_00125738	-	chr4:81614025-81614272	10.4797	0	#NAME?	down	0.0024	0.0139126	XLOC_082565
TCONS_00151538	-	chr7:37599753-37600000	10.4797	0	#NAME?	down	0.0024	0.0139126	XLOC_100123
TCONS_00087005	-	chr2:81689488-81689735	10.4797	0	#NAME?	down	0.0024	0.0139126	XLOC_055498
TCONS_00116507	-	chr3:81270043-81270290	10.4797	0	#NAME?	down	0.0024	0.0139126	XLOC_075858
TCONS_00042987	-	chr13:80994758-80995005	10.4797	0	#NAME?	down	0.0024	0.0139126	XLOC_028426
TCONS_00129637	-	chr5:58486550-58486797	10.4797	0	#NAME?	down	0.0024	0.0139126	XLOC_085580
TCONS_00022377	-	chr10:112126349-112126596	10.4797	0	#NAME?	down	0.0024	0.0139126	XLOC_014536
TCONS_00123704	-	chr4:181938431-181938692	10.4389	0	#NAME?	down	0.00215	0.0139126	XLOC_081088
TCONS_00053274	-	chr15:58335350-58335625	10.4337	0	#NAME?	down	0.002	0.0139126	XLOC_035680
TCONS_00032700	-	chr12:4807911-4808169	10.4278	0	#NAME?	down	0.00185	0.0139126	XLOC_021329
TCONS_00155570	-	chr7:20458585-20458843	10.4278	0	#NAME?	down	0.00185	0.0139126	XLOC_102854
TCONS_00091148	-	chr2:232598396-232598656	10.4088	0	#NAME?	down	0.00255	0.0139126	XLOC_058432
TCONS_00154057	-	chr7:128790258-128790518	10.4088	0	#NAME?	down	0.00255	0.0139126	XLOC_101843
TCONS_00122276	-	chr4:112797674-112797934	10.4088	0	#NAME?	down	0.00255	0.0139126	XLOC_080002
TCONS_00008686	-	chr1:16191624-16191885	10.3921	0	#NAME?	down	0.00135	0.0139126	XLOC_005489
TCONS_00110343	-	chr3:76183895-76184171	10.3819	0	#NAME?	down	0.00015	0.00279523	XLOC_071284
TCONS_00123680	-	chr4:177550614-177550862	10.3572	0	#NAME?	down	0.0025	0.0139126	XLOC_081064
TCONS_00073114	-	chr18:71603702-71603950	10.3572	0	#NAME?	down	0.0025	0.0139126	XLOC_047885
TCONS_00048115	-	chr14:85861229-85861477	10.3572	0	#NAME?	down	0.0025	0.0139126	XLOC_032244
TCONS_00180075	-	chrX:100479026-100479274	10.3572	0	#NAME?	down	0.0025	0.0139126	XLOC_120084
TCONS_00046081	-	chr14:26078418-26078681	10.3399	0	#NAME?	down	0.0028	0.0139126	XLOC_030666
TCONS_00048750	-	chr14:101125697-101125958	10.3129	0	#NAME?	down	0.0013	0.0139126	XLOC_032658
TCONS_00081530	-	chr19:49287272-49287526	10.3074	0	#NAME?	down	0.00165	0.0139126	XLOC_052826
TCONS_00126507	-	chr4:107346751-107347005	10.3074	0	#NAME?	down	0.00165	0.0139126	XLOC_083136
TCONS_00174649	-	chrX:5865749-5866003	10.3074	0	#NAME?	down	0.00165	0.0139126	XLOC_116331
TCONS_00107985	-	chr3:6016375-6016629	10.3074	0	#NAME?	down	0.00165	0.0139126	XLOC_069661
TCONS_00121828	-	chr4:87956875-87957132	10.2933	0	#NAME?	down	0.0022	0.0139126	XLOC_079680
TCONS_00039708	-	chr12:67264532-67264802	10.2862	0	#NAME?	down	0.0021	0.0139126	XLOC_026110
TCONS_00040029	-	chr12:88469163-88469430	10.2838	0	#NAME?	down	0.0016	0.0139126	XLOC_026323
TCONS_00014003	-	chr1:192103817-192104068	10.2812	0	#NAME?	down	0.0027	0.0139126	XLOC_008826
TCONS_00126270	-	chr4:98467662-98467913	10.2812	0	#NAME?	down	0.0027	0.0139126	XLOC_082986
TCONS_00022724	-	chr10:121426161-121426412	10.2812	0	#NAME?	down	0.0027	0.0139126	XLOC_014793
TCONS_00075717	-	chr19:13856559-13856811	10.2604	0	#NAME?	down	0.0028	0.0139126	XLOC_049572
TCONS_00015230	-	chr1:229150733-229150985	10.2604	0	#NAME?	down	0.0028	0.0139126	XLOC_009691
TCONS_00089894	-	chr2:190801151-190801415	10.2389	0	#NAME?	down	0.0026	0.0139126	XLOC_057560
TCONS_00090895	-	chr2:225307507-225307771	10.2389	0	#NAME?	down	0.0026	0.0139126	XLOC_058266
TCONS_00049834	-	chr14:48953774-48954038	10.2389	0	#NAME?	down	0.0026	0.0139126	XLOC_033362
TCONS_00178513	-	chrX:16545542-16545823	10.2221	0	#NAME?	down	0.00015	0.00279523	XLOC_119007
TCONS_00056623	-	chr15:70566107-70566355	10.2026	0	#NAME?	down	0.0024	0.0139126	XLOC_037997
TCONS_00116883	-	chr3:108012383-108012631	10.2026	0	#NAME?	down	0.0024	0.0139126	XLOC_076190
TCONS_00045796	-	chr14:22314762-22315010	10.2026	0	#NAME?	down	0.0024	0.0139126	XLOC_030529
TCONS_00109633	-	chr3:46607408-46607656	10.2026	0	#NAME?	down	0.0024	0.0139126	XLOC_070873
TCONS_00073115	-	chr18:71625749-71626008	10.1757	0	#NAME?	down	0.00185	0.0139126	XLOC_047886
TCONS_00086551	-	chr2:65974917-65975176	10.1757	0	#NAME?	down	0.00185	0.0139126	XLOC_055167
TCONS_00078892	-	chr19:3946538-3946797	10.1757	0	#NAME?	down	0.00185	0.0139126	XLOC_051328
TCONS_00151225	-	chr7:28965179-28965438	10.1757	0	#NAME?	down	0.00185	0.0139126	XLOC_099902
TCONS_00089619	-	chr2:183381142-183381405	10.159	0	#NAME?	down	0.00205	0.0139126	XLOC_057328
TCONS_00013904	-	chr1:181994598-181994859	10.1407	0	#NAME?	down	0.00255	0.0139126	XLOC_008760
TCONS_00073256	-	chr18:79569535-79569796	10.1407	0	#NAME?	down	0.00255	0.0139126	XLOC_047990
TCONS_00124117	-	chr4:1626664-1626920	10.114	0	#NAME?	down	0.0016	0.0139126	XLOC_081400
TCONS_00116607	-	chr3:99587230-99587479	10.0871	0	#NAME?	down	0.0025	0.0139126	XLOC_075940
TCONS_00052462	-	chr15:30833593-30833842	10.0871	0	#NAME?	down	0.0025	0.0139126	XLOC_035154
TCONS_00098343	-	chr20:6863127-6863376	10.0871	0	#NAME?	down	0.0025	0.0139126	XLOC_063489
TCONS_00169532	-	chr9:115775497-115775768	10.0793	0	#NAME?	down	0.0001	0.00197988	XLOC_112856
TCONS_00158969	-	chr7:143239929-143240195	10.0523	0	#NAME?	down	0.00245	0.0139126	XLOC_105199
TCONS_00153062	-	chr7:90427846-90428104	10.0413	0	#NAME?	down	0.0022	0.0139126	XLOC_101202
TCONS_00145836	-	chr6:113617574-113617832	10.0413	0	#NAME?	down	0.0022	0.0139126	XLOC_096805
TCONS_00058324	-	chr16:2512508-2512776	10.0317	0	#NAME?	down	0.0016	0.0139126	XLOC_038982
TCONS_00159855	-	chr8:9178267-9178535	10.0317	0	#NAME?	down	0.0016	0.0139126	XLOC_105878
TCONS_00090898	-	chr2:225351026-225351278	10.0168	0	#NAME?	down	0.0027	0.0139126	XLOC_058269
TCONS_00006693	-	chr1:205647717-205647969	10.0168	0	#NAME?	down	0.0027	0.0139126	XLOC_004249
TCONS_00112595	-	chr3:156006041-156006312	10.0159	0	#NAME?	down	5e-05	0.00109431	XLOC_073044
TCONS_00035907	-	chr12:80017338-80017612	10.0141	0	#NAME?	down	0.0022	0.0139126	XLOC_023672
TCONS_00155875	-	chr7:28846981-28847234	10.0003	0	#NAME?	down	0.0028	0.0139126	XLOC_103088
TCONS_00010500	-	chr1:61606027-61606292	9.98186	0	#NAME?	down	0.0026	0.0139126	XLOC_006593
TCONS_00123326	-	chr4:156298363-156298626	9.94917	0	#NAME?	down	0.00215	0.0139126	XLOC_080805
TCONS_00142796	-	chr6:14903074-14903323	9.93457	0	#NAME?	down	0.0024	0.0139126	XLOC_094742
TCONS_00123700	-	chr4:181394046-181394295	9.93457	0	#NAME?	down	0.0024	0.0139126	XLOC_081084
TCONS_00046967	-	chr14:53687649-53687898	9.93457	0	#NAME?	down	0.0024	0.0139126	XLOC_031417
TCONS_00063142	-	chr16:69482269-69482518	9.93457	0	#NAME?	down	0.0024	0.0139126	XLOC_041910
TCONS_00161426	-	chr8:74981660-74981929	9.92902	0	#NAME?	down	5e-05	0.00109431	XLOC_106977
TCONS_00169241	-	chr9:107798704-107798973	9.92902	0	#NAME?	down	5e-05	0.00109431	XLOC_112634
TCONS_00077127	-	chr19:42979179-42979443	9.9189	0	#NAME?	down	0.00205	0.0139126	XLOC_050393
TCONS_00110499	-	chr3:76713339-76713596	9.86609	0	#NAME?	down	0.0016	0.0139126	XLOC_071437
TCONS_00118736	-	chr3:176524620-176524877	9.86609	0	#NAME?	down	0.0016	0.0139126	XLOC_077473
TCONS_00151976	-	chr7:54858655-54858912	9.86609	0	#NAME?	down	0.0016	0.0139126	XLOC_100427
TCONS_00010561	-	chr1:64469148-64469405	9.86609	0	#NAME?	down	0.0016	0.0139126	XLOC_006637
TCONS_00126876	-	chr4:123338513-123338770	9.86609	0	#NAME?	down	0.0016	0.0139126	XLOC_083419
TCONS_00116611	-	chr3:99617190-99617447	9.86609	0	#NAME?	down	0.0016	0.0139126	XLOC_075944
TCONS_00174845	-	chrX:10015271-10015533	9.83408	0	#NAME?	down	0.0029	0.0142149	XLOC_116513
TCONS_00024645	-	chr11:44460367-44460617	9.82562	0	#NAME?	down	0.0025	0.0139126	XLOC_016142
TCONS_00123293	-	chr4:154714437-154714687	9.82562	0	#NAME?	down	0.0025	0.0139126	XLOC_080792
TCONS_00060613	-	chr16:78054282-78054532	9.82562	0	#NAME?	down	0.0025	0.0139126	XLOC_040304
TCONS_00003907	-	chr1:109797661-109797911	9.82562	0	#NAME?	down	0.0025	0.0139126	XLOC_002477
TCONS_00046950	-	chr14:53600329-53600596	9.82021	0	#NAME?	down	0.00245	0.0139126	XLOC_031400
TCONS_00061669	-	chr16:8966083-8966339	9.79955	0	#NAME?	down	0.00165	0.0139126	XLOC_040904
TCONS_00127484	-	chr4:144985612-144985868	9.79955	0	#NAME?	down	0.00165	0.0139126	XLOC_083956
TCONS_00118437	-	chr3:152182024-152182280	9.79955	0	#NAME?	down	0.00165	0.0139126	XLOC_077304
TCONS_00161051	-	chr8:60912075-60912331	9.79955	0	#NAME?	down	0.00165	0.0139126	XLOC_106688
TCONS_00162545	-	chr8:126020210-126020469	9.79708	0	#NAME?	down	0.0022	0.0139126	XLOC_107859
TCONS_00137869	-	chr6:7681248-7681507	9.79708	0	#NAME?	down	0.0022	0.0139126	XLOC_091304
TCONS_00141604	-	chr6:148185631-148185914	9.76724	0	#NAME?	down	0.0015	0.0139126	XLOC_093887
TCONS_00035110	-	chr12:58970663-58970916	9.7614	0	#NAME?	down	0.0027	0.0139126	XLOC_023005
TCONS_00087234	-	chr2:91768384-91768637	9.7614	0	#NAME?	down	0.0027	0.0139126	XLOC_055664
TCONS_00064209	-	chr16:68237064-68237317	9.7614	0	#NAME?	down	0.0027	0.0139126	XLOC_042695
TCONS_00163916	-	chr8:38099573-38099826	9.7614	0	#NAME?	down	0.0027	0.0139126	XLOC_108843
TCONS_00044201	-	chr13:40238358-40238620	9.75663	0	#NAME?	down	0.00225	0.0139126	XLOC_029302
TCONS_00017878	-	chr10:78218436-78218698	9.75663	0	#NAME?	down	0.00225	0.0139126	XLOC_011585
TCONS_00162019	-	chr8:95190308-95190574	9.7332	0	#NAME?	down	0.0026	0.0139126	XLOC_107471
TCONS_00152583	-	chr7:75912893-75913159	9.7332	0	#NAME?	down	0.0026	0.0139126	XLOC_100837
TCONS_00035568	-	chr12:70440076-70440342	9.7332	0	#NAME?	down	0.0026	0.0139126	XLOC_023360
TCONS_00012705	-	chr1:153567708-153567974	9.7332	0	#NAME?	down	0.0026	0.0139126	XLOC_008060
TCONS_00143461	-	chr6:31494225-31494491	9.7332	0	#NAME?	down	0.0026	0.0139126	XLOC_095221
TCONS_00114204	-	chr3:7818148-7818403	9.72289	0	#NAME?	down	0.0025	0.0139126	XLOC_074303
TCONS_00130272	-	chr5:82470235-82470499	9.71533	0	#NAME?	down	0.00215	0.0139126	XLOC_085969
TCONS_00031657	-	chr11:116114579-116114843	9.71533	0	#NAME?	down	0.00215	0.0139126	XLOC_020676
TCONS_00133521	-	chr5:32329752-32330013	9.69322	0	#NAME?	down	0.00185	0.0139126	XLOC_088275
TCONS_00087641	-	chr2:104046965-104047226	9.69322	0	#NAME?	down	0.00185	0.0139126	XLOC_055928
TCONS_00169326	-	chr9:111877600-111877865	9.6864	0	#NAME?	down	0.00205	0.0139126	XLOC_112696
TCONS_00055382	-	chr15:38036822-38037072	9.6753	0	#NAME?	down	0.0024	0.0139126	XLOC_037175
TCONS_00126211	-	chr4:89588689-89588939	9.6753	0	#NAME?	down	0.0024	0.0139126	XLOC_082939
TCONS_00122970	-	chr4:143505257-143505507	9.6753	0	#NAME?	down	0.0024	0.0139126	XLOC_080551
TCONS_00017885	-	chr10:78312746-78312996	9.6753	0	#NAME?	down	0.0024	0.0139126	XLOC_011590
TCONS_00068283	-	chr17:8325039-8325289	9.6753	0	#NAME?	down	0.0024	0.0139126	XLOC_045000
TCONS_00102262	-	chr21:14321499-14321749	9.6753	0	#NAME?	down	0.0024	0.0139126	XLOC_065994
TCONS_00056298	-	chr15:63873764-63874039	9.64695	0	#NAME?	down	0.0001	0.00197988	XLOC_037786
TCONS_00108452	-	chr3:20223204-20223477	9.64683	0	#NAME?	down	0.00095	0.0139126	XLOC_069973
TCONS_00041020	-	chr12:119664607-119664870	9.62927	0	#NAME?	down	0.00255	0.0139126	XLOC_027012
TCONS_00181201	-	chrX:151353068-151353331	9.62927	0	#NAME?	down	0.00255	0.0139126	XLOC_120843
TCONS_00128491	-	chr4:7748407-7748670	9.62927	0	#NAME?	down	0.00255	0.0139126	XLOC_084715
TCONS_00019865	-	chr10:11669140-11669398	9.62571	0	#NAME?	down	0.0016	0.0139126	XLOC_012919
TCONS_00108744	-	chr3:28819614-28819882	9.59532	0	#NAME?	down	0.00245	0.0139126	XLOC_070232
TCONS_00092855	-	chr2:55098102-55098353	9.57238	0	#NAME?	down	0.0025	0.0139126	XLOC_059542
TCONS_00074482	-	chr18:60911224-60911475	9.57238	0	#NAME?	down	0.0025	0.0139126	XLOC_048843
TCONS_00049836	-	chr14:49191377-49191628	9.57238	0	#NAME?	down	0.0025	0.0139126	XLOC_033364
TCONS_00050309	-	chr14:63670148-63670421	9.57046	0	#NAME?	down	0.0021	0.0139126	XLOC_033681
TCONS_00105292	-	chr22:26967040-26967313	9.57046	0	#NAME?	down	0.0021	0.0139126	XLOC_068114
TCONS_00108722	-	chr3:28569768-28570041	9.57046	0	#NAME?	down	0.0021	0.0139126	XLOC_070214
TCONS_00060732	-	chr16:83818335-83818618	9.56648	0	#NAME?	down	0.0002	0.00360609	XLOC_040380
TCONS_00015047	-	chr1:226002949-226003206	9.55811	0	#NAME?	down	0.00165	0.0139126	XLOC_009552
TCONS_00136693	-	chr5:153954087-153954344	9.55811	0	#NAME?	down	0.00165	0.0139126	XLOC_090515
TCONS_00068618	-	chr17:16599725-16599995	9.55143	0	#NAME?	down	0.0016	0.0139126	XLOC_045257
TCONS_00142781	-	chr6:14631344-14631607	9.52407	0	#NAME?	down	0.00225	0.0139126	XLOC_094727
TCONS_00092502	-	chr2:42367180-42367434	9.51455	0	#NAME?	down	0.0027	0.0139126	XLOC_059266
TCONS_00036003	-	chr12:90094606-90094860	9.51455	0	#NAME?	down	0.0027	0.0139126	XLOC_023750
TCONS_00127039	-	chr4:134049930-134050184	9.51455	0	#NAME?	down	0.0027	0.0139126	XLOC_083564
TCONS_00088533	-	chr2:138041276-138041530	9.51455	0	#NAME?	down	0.0027	0.0139126	XLOC_056526
TCONS_00086047	-	chr2:47599951-47600206	9.50606	0	#NAME?	down	0.0028	0.0139126	XLOC_054774
TCONS_00073106	-	chr18:70674881-70675136	9.50606	0	#NAME?	down	0.0028	0.0139126	XLOC_047877
TCONS_00131462	-	chr5:130195633-130195888	9.50606	0	#NAME?	down	0.0028	0.0139126	XLOC_086941
TCONS_00002634	-	chr1:55937899-55938166	9.49276	0	#NAME?	down	0.0026	0.0139126	XLOC_001620
TCONS_00132472	-	chr5:158232384-158232654	9.49028	0	#NAME?	down	0.0011	0.0139126	XLOC_087567
TCONS_00059715	-	chr16:50115681-50115946	9.48876	0	#NAME?	down	0.00215	0.0139126	XLOC_039762
TCONS_00177442	-	chrX:132185070-132185335	9.48876	0	#NAME?	down	0.00215	0.0139126	XLOC_118293
TCONS_00018132	-	chr10:88151234-88151496	9.46269	0	#NAME?	down	0.00185	0.0139126	XLOC_011746
TCONS_00028235	-	chr11:4588262-4588528	9.46102	0	#NAME?	down	0.00205	0.0139126	XLOC_018448
TCONS_00010881	-	chr1:83407160-83407426	9.46102	0	#NAME?	down	0.00205	0.0139126	XLOC_006883
TCONS_00018626	-	chr10:100970460-100970711	9.42444	0	#NAME?	down	0.0024	0.0139126	XLOC_012082
TCONS_00140308	-	chr6:105795802-105796061	9.39294	0	#NAME?	down	0.0016	0.0139126	XLOC_092874
TCONS_00095085	-	chr2:132346505-132346769	9.38568	0	#NAME?	down	0.00255	0.0139126	XLOC_061146
TCONS_00174853	-	chrX:10332843-10333107	9.38568	0	#NAME?	down	0.00255	0.0139126	XLOC_116518
TCONS_00006151	-	chr1:185700658-185700932	9.36852	0	#NAME?	down	5e-05	0.00109431	XLOC_003870
TCONS_00015178	-	chr1:228772132-228772417	9.35325	0	#NAME?	down	0.00015	0.00279523	XLOC_009639
TCONS_00134729	-	chr5:89923149-89923434	9.35325	0	#NAME?	down	0.00015	0.00279523	XLOC_089105
TCONS_00038331	-	chr12:31804457-31804737	9.33644	0	#NAME?	down	5e-05	0.00109431	XLOC_025209
TCONS_00120771	-	chr4:42154146-42154407	9.32954	0	#NAME?	down	0.0022	0.0139126	XLOC_078877
TCONS_00015641	-	chr1:246932182-246932434	9.32763	0	#NAME?	down	0.0025	0.0139126	XLOC_009982
TCONS_00125850	-	chr4:82253928-82254186	9.32406	0	#NAME?	down	0.00165	0.0139126	XLOC_082677
TCONS_00151958	-	chr7:50418386-50418644	9.32406	0	#NAME?	down	0.00165	0.0139126	XLOC_100414
TCONS_00090896	-	chr2:225326711-225326982	9.32278	0	#NAME?	down	0.0016	0.0139126	XLOC_058267
TCONS_00154054	-	chr7:128785065-128785336	9.32278	0	#NAME?	down	0.0016	0.0139126	XLOC_101840
TCONS_00141284	-	chr6:134368469-134368733	9.29897	0	#NAME?	down	0.00225	0.0139126	XLOC_093647
TCONS_00140836	-	chr6:119897320-119897584	9.29897	0	#NAME?	down	0.00225	0.0139126	XLOC_093297
TCONS_00024382	-	chr11:28590205-28590469	9.29897	0	#NAME?	down	0.00225	0.0139126	XLOC_015983
TCONS_00025646	-	chr11:68277249-68277513	9.29897	0	#NAME?	down	0.00225	0.0139126	XLOC_016675
TCONS_00140031	-	chr6:82578745-82579017	9.27842	0	#NAME?	down	5e-05	0.00109431	XLOC_092665
TCONS_00007675	-	chr1:235961922-235962194	9.27842	0	#NAME?	down	5e-05	0.00109431	XLOC_004851
TCONS_00141771	-	chr6:153928944-153929199	9.27624	0	#NAME?	down	0.0027	0.0139126	XLOC_094003
TCONS_00101803	-	chr20:52035584-52035839	9.27624	0	#NAME?	down	0.0027	0.0139126	XLOC_065706
TCONS_00036291	-	chr12:97427342-97427597	9.27624	0	#NAME?	down	0.0027	0.0139126	XLOC_023980
TCONS_00005333	-	chr1:160462983-160463238	9.27624	0	#NAME?	down	0.0027	0.0139126	XLOC_003352
TCONS_00089796	-	chr2:187566658-187566913	9.27624	0	#NAME?	down	0.0027	0.0139126	XLOC_057495
TCONS_00126505	-	chr4:107304873-107305128	9.27624	0	#NAME?	down	0.0027	0.0139126	XLOC_083134
TCONS_00117086	-	chr3:117981809-117982075	9.26912	0	#NAME?	down	0.00215	0.0139126	XLOC_076331
TCONS_00157327	-	chr7:91554042-91554310	9.26007	0	#NAME?	down	0.0026	0.0139126	XLOC_104105
TCONS_00141532	-	chr6:147674874-147675126	9.18208	0	#NAME?	down	0.0024	0.0139126	XLOC_093815
TCONS_00090280	-	chr2:203853947-203854199	9.18208	0	#NAME?	down	0.0024	0.0139126	XLOC_057816
TCONS_00033252	-	chr12:11189416-11189668	9.18208	0	#NAME?	down	0.0024	0.0139126	XLOC_021702
TCONS_00091230	-	chr2:236888517-236888769	9.18208	0	#NAME?	down	0.0024	0.0139126	XLOC_058472
TCONS_00178661	-	chrX:27125074-27125326	9.18208	0	#NAME?	down	0.0024	0.0139126	XLOC_119090
TCONS_00158704	-	chr7:135283806-135284058	9.18208	0	#NAME?	down	0.0024	0.0139126	XLOC_105011
TCONS_00052549	-	chr15:34612784-34613036	9.18208	0	#NAME?	down	0.0024	0.0139126	XLOC_035212
TCONS_00135078	-	chr5:101947668-101947920	9.18208	0	#NAME?	down	0.0024	0.0139126	XLOC_089384
TCONS_00146472	-	chr6:138352904-138353164	9.16707	0	#NAME?	down	0.0016	0.0139126	XLOC_097252
TCONS_00086394	-	chr2:62528572-62528832	9.16707	0	#NAME?	down	0.0016	0.0139126	XLOC_055032
TCONS_00146088	-	chr6:125656538-125656813	9.1646	0	#NAME?	down	5e-05	0.00109431	XLOC_096998
TCONS_00015777	-	chr1:171181674-171181939	9.15004	0	#NAME?	down	0.00255	0.0139126	XLOC_010083
TCONS_00002820	-	chr1:63702407-63702672	9.15004	0	#NAME?	down	0.00255	0.0139126	XLOC_001763
TCONS_00125071	-	chr4:38417399-38417664	9.15004	0	#NAME?	down	0.00255	0.0139126	XLOC_082160
TCONS_00176648	-	chrX:79176502-79176767	9.15004	0	#NAME?	down	0.00255	0.0139126	XLOC_117799
TCONS_00001408	-	chr1:30769293-30769558	9.15004	0	#NAME?	down	0.00255	0.0139126	XLOC_000833
TCONS_00092988	-	chr2:57465796-57466061	9.15004	0	#NAME?	down	0.00255	0.0139126	XLOC_059661
TCONS_00046604	-	chr14:42546071-42546346	9.12946	0	#NAME?	down	0.0021	0.0139126	XLOC_031114
TCONS_00038495	-	chr12:45672124-45672386	9.10618	0	#NAME?	down	0.0022	0.0139126	XLOC_025325
TCONS_00084876	-	chr2:7283327-7283586	9.09729	0	#NAME?	down	0.00165	0.0139126	XLOC_053930
TCONS_00035339	-	chr12:67733887-67734146	9.09729	0	#NAME?	down	0.00165	0.0139126	XLOC_023180
TCONS_00040141	-	chr12:91922487-91922740	9.09116	0	#NAME?	down	0.0025	0.0139126	XLOC_026409
TCONS_00169115	-	chr9:105832912-105833165	9.09116	0	#NAME?	down	0.0025	0.0139126	XLOC_112514
TCONS_00123689	-	chr4:177599761-177600014	9.09116	0	#NAME?	down	0.0025	0.0139126	XLOC_081073
TCONS_00073058	-	chr18:69207951-69208207	9.04574	0	#NAME?	down	0.0027	0.0139126	XLOC_047837
TCONS_00112262	-	chr3:144391629-144391885	9.04574	0	#NAME?	down	0.0027	0.0139126	XLOC_072774
TCONS_00092193	-	chr2:27568061-27568334	9.0371	0	#NAME?	down	5e-05	0.00109431	XLOC_059064
TCONS_00156589	-	chr7:54727482-54727760	9.03612	0	#NAME?	down	0.0001	0.00197988	XLOC_103548
TCONS_00131360	-	chr5:123863443-123863712	9.03477	0	#NAME?	down	0.0026	0.0139126	XLOC_086860
TCONS_00165806	-	chr8:119720006-119720296	9.02818	0	#NAME?	down	5e-05	0.00109431	XLOC_110172
TCONS_00144024	-	chr6:41415296-41415560	9.02138	0	#NAME?	down	0.00185	0.0139126	XLOC_095507
TCONS_00006939	-	chr1:212415272-212415536	9.02138	0	#NAME?	down	0.00185	0.0139126	XLOC_004384
TCONS_00074301	-	chr18:53860365-53860633	8.98097	0	#NAME?	down	0.00215	0.0139126	XLOC_048703
TCONS_00041687	-	chr13:22134492-22134768	8.9662	0	#NAME?	down	5e-05	0.00109431	XLOC_027421
TCONS_00010013	-	chr1:47190187-47190440	8.94795	0	#NAME?	down	0.0024	0.0139126	XLOC_006252
TCONS_00103706	-	chr21:28349879-28350132	8.94795	0	#NAME?	down	0.0024	0.0139126	XLOC_067061
TCONS_00101323	-	chr20:40389192-40389445	8.94795	0	#NAME?	down	0.0024	0.0139126	XLOC_065402
TCONS_00108921	-	chr3:32007074-32007327	8.94795	0	#NAME?	down	0.0024	0.0139126	XLOC_070400
TCONS_00180653	-	chrX:129150404-129150657	8.94795	0	#NAME?	down	0.0024	0.0139126	XLOC_120469
TCONS_00039815	-	chr12:71588802-71589055	8.94795	0	#NAME?	down	0.0024	0.0139126	XLOC_026178
TCONS_00137974	-	chr6:11433867-11434128	8.94759	0	#NAME?	down	0.0016	0.0139126	XLOC_091383
TCONS_00088805	-	chr2:157329145-157329406	8.94759	0	#NAME?	down	0.0016	0.0139126	XLOC_056737
TCONS_00044118	-	chr13:39274156-39274422	8.9221	0	#NAME?	down	0.00255	0.0139126	XLOC_029221
TCONS_00145917	-	chr6:118400992-118401258	8.9221	0	#NAME?	down	0.00255	0.0139126	XLOC_096869
TCONS_00038408	-	chr12:41923786-41924052	8.9221	0	#NAME?	down	0.00255	0.0139126	XLOC_025271
TCONS_00165097	-	chr8:90580043-90580309	8.9221	0	#NAME?	down	0.00255	0.0139126	XLOC_109694
TCONS_00121861	-	chr4:89623557-89623836	8.91572	0	#NAME?	down	0.0022	0.0139126	XLOC_079699
TCONS_00081642	-	chr19:50783590-50783883	8.91144	0	#NAME?	down	5e-05	0.00109431	XLOC_052874
TCONS_00132076	-	chr5:142503267-142503548	8.89828	0	#NAME?	down	5e-05	0.00109431	XLOC_087307
TCONS_00129708	-	chr5:62705100-62705363	8.88913	0	#NAME?	down	0.0022	0.0139126	XLOC_085623
TCONS_00143213	-	chr6:28048719-28048979	8.87715	0	#NAME?	down	0.00165	0.0139126	XLOC_095073
TCONS_00088082	-	chr2:116213171-116213431	8.87715	0	#NAME?	down	0.00165	0.0139126	XLOC_056220
TCONS_00181440	-	chrX:7368371-7368631	8.87715	0	#NAME?	down	0.00165	0.0139126	XLOC_120962
TCONS_00033365	-	chr12:11580088-11580354	8.86971	0	#NAME?	down	0.00225	0.0139126	XLOC_021812
TCONS_00075929	-	chr19:17591104-17591358	8.86261	0	#NAME?	down	0.0025	0.0139126	XLOC_049687
TCONS_00074504	-	chr18:61440097-61440351	8.86261	0	#NAME?	down	0.0025	0.0139126	XLOC_048865
TCONS_00028289	-	chr11:5541110-5541364	8.86261	0	#NAME?	down	0.0025	0.0139126	XLOC_018495
TCONS_00164990	-	chr8:89325896-89326150	8.86261	0	#NAME?	down	0.0025	0.0139126	XLOC_109606
TCONS_00057654	-	chr15:98524240-98524494	8.86261	0	#NAME?	down	0.0025	0.0139126	XLOC_038642
TCONS_00169033	-	chr9:101941980-101942234	8.86261	0	#NAME?	down	0.0025	0.0139126	XLOC_112461
TCONS_00171770	-	chr9:70006570-70006824	8.86261	0	#NAME?	down	0.0025	0.0139126	XLOC_114308
TCONS_00126181	-	chr4:88554861-88555115	8.86261	0	#NAME?	down	0.0025	0.0139126	XLOC_082916
TCONS_00140867	-	chr6:120040584-120040852	8.84972	0	#NAME?	down	0.00215	0.0139126	XLOC_093328
TCONS_00006233	-	chr1:187454591-187454860	8.82579	0	#NAME?	down	0.00205	0.0139126	XLOC_003934
TCONS_00141762	-	chr6:152741485-152741754	8.82579	0	#NAME?	down	0.00205	0.0139126	XLOC_093995
TCONS_00126520	-	chr4:107533293-107533562	8.82579	0	#NAME?	down	0.00205	0.0139126	XLOC_083149
TCONS_00019187	-	chr10:121975341-121975599	8.82356	0	#NAME?	down	0.0028	0.0139126	XLOC_012452
TCONS_00123627	-	chr4:176809162-176809420	8.82356	0	#NAME?	down	0.0028	0.0139126	XLOC_081014
TCONS_00136946	-	chr5:170230073-170230331	8.82356	0	#NAME?	down	0.0028	0.0139126	XLOC_090698
TCONS_00110191	-	chr3:67133113-67133371	8.82356	0	#NAME?	down	0.0028	0.0139126	XLOC_071167
TCONS_00046705	-	chr14:51291483-51291740	8.82287	0	#NAME?	down	0.0027	0.0139126	XLOC_031181
TCONS_00163516	-	chr8:19857075-19857345	8.81671	0	#NAME?	down	0.0026	0.0139126	XLOC_108567
TCONS_00133572	-	chr5:33401476-33401746	8.81671	0	#NAME?	down	0.0026	0.0139126	XLOC_088319
TCONS_00103603	-	chr21:25553101-25553371	8.81671	0	#NAME?	down	0.0026	0.0139126	XLOC_066984
TCONS_00014376	-	chr1:205138098-205138363	8.81099	0	#NAME?	down	0.00185	0.0139126	XLOC_009067
TCONS_00111411	-	chr3:122357652-122357929	8.77273	0	#NAME?	down	5e-05	0.00109431	XLOC_072134
TCONS_00016185	-	chr10:12333614-12333886	8.76295	0	#NAME?	down	0.00245	0.0139126	XLOC_010400
TCONS_00120566	-	chr4:36359321-36359583	8.73479	0	#NAME?	down	0.0016	0.0139126	XLOC_078741
TCONS_00036473	-	chr12:104368942-104369204	8.73479	0	#NAME?	down	0.0016	0.0139126	XLOC_024087
TCONS_00110948	-	chr3:106132846-106133126	8.73249	0	#NAME?	down	0.0001	0.00197988	XLOC_071787
TCONS_00142904	-	chr6:19728521-19728775	8.72167	0	#NAME?	down	0.0024	0.0139126	XLOC_094829
TCONS_00159358	-	chr7:155612587-155612841	8.72167	0	#NAME?	down	0.0024	0.0139126	XLOC_105488
TCONS_00086213	-	chr2:56500707-56500961	8.72167	0	#NAME?	down	0.0024	0.0139126	XLOC_054890
TCONS_00053746	-	chr15:72611731-72611985	8.72167	0	#NAME?	down	0.0024	0.0139126	XLOC_036015
TCONS_00002417	-	chr1:52099048-52099302	8.72167	0	#NAME?	down	0.0024	0.0139126	XLOC_001454
TCONS_00100837	-	chr20:23652807-23653061	8.72167	0	#NAME?	down	0.0024	0.0139126	XLOC_065135
TCONS_00074658	-	chr18:73313162-73313416	8.72167	0	#NAME?	down	0.0024	0.0139126	XLOC_048981
TCONS_00127067	-	chr4:137022429-137022696	8.7017	0	#NAME?	down	0.00255	0.0139126	XLOC_083589
TCONS_00057114	-	chr15:81909010-81909277	8.7017	0	#NAME?	down	0.00255	0.0139126	XLOC_038283
TCONS_00111251	-	chr3:115326711-115327002	8.69237	0	#NAME?	down	0.0001	0.00197988	XLOC_072013
TCONS_00130483	-	chr5:87429490-87429765	8.68225	0	#NAME?	down	5e-05	0.00109431	XLOC_086168
TCONS_00127732	-	chr4:157596962-157597223	8.66315	0	#NAME?	down	0.00165	0.0139126	XLOC_084130
TCONS_00074197	-	chr18:48962641-48962902	8.66315	0	#NAME?	down	0.00165	0.0139126	XLOC_048645
TCONS_00096162	-	chr2:182136378-182136639	8.66315	0	#NAME?	down	0.00165	0.0139126	XLOC_061891
TCONS_00122946	-	chr4:143288591-143288852	8.66315	0	#NAME?	down	0.00165	0.0139126	XLOC_080531
TCONS_00120797	-	chr4:44738556-44738817	8.66315	0	#NAME?	down	0.00165	0.0139126	XLOC_078901
TCONS_00107266	-	chr22:39214049-39214336	8.64715	0	#NAME?	down	0.00115	0.0139126	XLOC_069260
TCONS_00036479	-	chr12:104412130-104412385	8.64187	0	#NAME?	down	0.0025	0.0139126	XLOC_024093
TCONS_00031143	-	chr11:95556557-95556812	8.64187	0	#NAME?	down	0.0025	0.0139126	XLOC_020330
TCONS_00042041	-	chr13:37618091-37618346	8.64187	0	#NAME?	down	0.0025	0.0139126	XLOC_027695
TCONS_00178789	-	chrX:36815699-36815954	8.64187	0	#NAME?	down	0.0025	0.0139126	XLOC_119189
TCONS_00073992	-	chr18:41594935-41595190	8.64187	0	#NAME?	down	0.0025	0.0139126	XLOC_048495
TCONS_00132335	-	chr5:154090283-154090538	8.64187	0	#NAME?	down	0.0025	0.0139126	XLOC_087472
TCONS_00017225	-	chr10:58413992-58414247	8.64187	0	#NAME?	down	0.0025	0.0139126	XLOC_011124
TCONS_00147080	-	chr6:158231413-158231676	8.61688	0	#NAME?	down	0.0018	0.0139126	XLOC_097724
TCONS_00022028	-	chr10:98374296-98374562	8.60704	0	#NAME?	down	0.00185	0.0139126	XLOC_014333
TCONS_00141590	-	chr6:148084470-148084728	8.60682	0	#NAME?	down	0.0027	0.0139126	XLOC_093873
TCONS_00102877	-	chr21:37568565-37568823	8.60682	0	#NAME?	down	0.0027	0.0139126	XLOC_066467
TCONS_00044433	-	chr13:46211471-46211729	8.60682	0	#NAME?	down	0.0027	0.0139126	XLOC_029475
TCONS_00027837	-	chr11:128622772-128623043	8.60565	0	#NAME?	down	0.0026	0.0139126	XLOC_018230
TCONS_00125991	-	chr4:84316323-84316594	8.60565	0	#NAME?	down	0.0026	0.0139126	XLOC_082760
TCONS_00027488	-	chr11:119531718-119531981	8.52786	0	#NAME?	down	0.0016	0.0139126	XLOC_018005
TCONS_00041901	-	chr13:31176604-31176867	8.52786	0	#NAME?	down	0.0016	0.0139126	XLOC_027580
TCONS_00120825	-	chr4:47023609-47023872	8.52786	0	#NAME?	down	0.0016	0.0139126	XLOC_078929
TCONS_00070534	-	chr17:64739643-64739931	8.52757	0	#NAME?	down	5e-05	0.00109431	XLOC_046346
TCONS_00152880	-	chr7:80533883-80534142	8.52725	0	#NAME?	down	0.0025	0.0139126	XLOC_101076
TCONS_00108380	-	chr3:16094743-16095014	8.52069	0	#NAME?	down	0.0022	0.0139126	XLOC_069913
TCONS_00056451	-	chr15:65796157-65796435	8.51494	0	#NAME?	down	0.0021	0.0139126	XLOC_037867
TCONS_00141707	-	chr6:151147705-151147960	8.50322	0	#NAME?	down	0.0024	0.0139126	XLOC_093956
TCONS_00027430	-	chr11:118806105-118806360	8.50322	0	#NAME?	down	0.0024	0.0139126	XLOC_017980
TCONS_00142167	-	chr6:168371124-168371379	8.50322	0	#NAME?	down	0.0024	0.0139126	XLOC_094275
TCONS_00169627	-	chr9:117971093-117971348	8.50322	0	#NAME?	down	0.0024	0.0139126	XLOC_112941
TCONS_00145598	-	chr6:105534652-105534907	8.50322	0	#NAME?	down	0.0024	0.0139126	XLOC_096668
TCONS_00070771	-	chr17:71249199-71249483	8.49817	0	#NAME?	down	0.002	0.0139126	XLOC_046514
TCONS_00011072	-	chr1:88098776-88099044	8.48839	0	#NAME?	down	0.00255	0.0139126	XLOC_007010
TCONS_00100814	-	chr20:23326569-23326837	8.48839	0	#NAME?	down	0.00255	0.0139126	XLOC_065119
TCONS_00078086	-	chr19:54134456-54134740	8.47908	0	#NAME?	down	5e-05	0.00109431	XLOC_050932
TCONS_00130259	-	chr5:82418096-82418367	8.47904	0	#NAME?	down	0.0028	0.0139126	XLOC_085956
TCONS_00143419	-	chr6:30809585-30809860	8.47736	0	#NAME?	down	0.0016	0.0139126	XLOC_095188
TCONS_00022604	-	chr10:119489598-119489873	8.47736	0	#NAME?	down	0.0016	0.0139126	XLOC_014686
TCONS_00016912	-	chr10:37891730-37891995	8.4756	0	#NAME?	down	0.0022	0.0139126	XLOC_010922
TCONS_00010065	-	chr1:48182629-48182894	8.4756	0	#NAME?	down	0.0022	0.0139126	XLOC_006285
TCONS_00145524	-	chr6:98848554-98848819	8.4756	0	#NAME?	down	0.0022	0.0139126	XLOC_096628
TCONS_00115294	-	chr3:43666445-43666713	8.46646	0	#NAME?	down	0.00225	0.0139126	XLOC_075106
TCONS_00113690	-	chr3:193712493-193712761	8.46646	0	#NAME?	down	0.00225	0.0139126	XLOC_073875
TCONS_00101326	-	chr20:40563695-40563957	8.45574	0	#NAME?	down	0.00165	0.0139126	XLOC_065405
TCONS_00074740	-	chr18:79637503-79637765	8.45574	0	#NAME?	down	0.00165	0.0139126	XLOC_049039
TCONS_00019158	-	chr10:119880508-119880770	8.45574	0	#NAME?	down	0.00165	0.0139126	XLOC_012432
TCONS_00132422	-	chr5:155155434-155155690	8.42834	0	#NAME?	down	0.0025	0.0139126	XLOC_087532
TCONS_00163699	-	chr8:24796518-24796774	8.42834	0	#NAME?	down	0.0025	0.0139126	XLOC_108709
TCONS_00121999	-	chr4:100100556-100100812	8.42834	0	#NAME?	down	0.0025	0.0139126	XLOC_079788
TCONS_00034719	-	chr12:51850798-51851054	8.42834	0	#NAME?	down	0.0025	0.0139126	XLOC_022811
TCONS_00089666	-	chr2:186685033-186685289	8.42834	0	#NAME?	down	0.0025	0.0139126	XLOC_057368
TCONS_00137979	-	chr6:11829111-11829367	8.42834	0	#NAME?	down	0.0025	0.0139126	XLOC_091387
TCONS_00005853	-	chr1:177571056-177571312	8.42834	0	#NAME?	down	0.0025	0.0139126	XLOC_003660
TCONS_00050425	-	chr14:66290692-66290952	8.40315	0	#NAME?	down	0.0028	0.0139126	XLOC_033760
TCONS_00050068	-	chr14:55526454-55526726	8.40136	0	#NAME?	down	0.0026	0.0139126	XLOC_033522
TCONS_00036800	-	chr12:112932881-112933140	8.3975	0	#NAME?	down	0.0027	0.0139126	XLOC_024313
TCONS_00003598	-	chr1:95598155-95598414	8.3975	0	#NAME?	down	0.0027	0.0139126	XLOC_002299
TCONS_00120194	-	chr4:12218302-12218561	8.3975	0	#NAME?	down	0.0027	0.0139126	XLOC_078461
TCONS_00101337	-	chr20:40833298-40833557	8.3975	0	#NAME?	down	0.0027	0.0139126	XLOC_065416
TCONS_00097858	-	chr2:238424964-238425223	8.3975	0	#NAME?	down	0.0027	0.0139126	XLOC_063166
TCONS_00033779	-	chr12:22767137-22767411	8.38236	0	#NAME?	down	0.00245	0.0139126	XLOC_022134
TCONS_00166797	-	chr9:3762141-3762405	8.32743	0	#NAME?	down	0.0016	0.0139126	XLOC_110786
TCONS_00158106	-	chr7:108541112-108541376	8.29242	0	#NAME?	down	0.002	0.0139126	XLOC_104609
TCONS_00124846	-	chr4:22313861-22314117	8.29193	0	#NAME?	down	0.0024	0.0139126	XLOC_081968
TCONS_00089242	-	chr2:172258667-172258923	8.29193	0	#NAME?	down	0.0024	0.0139126	XLOC_057058
TCONS_00072130	-	chr18:9408947-9409203	8.29193	0	#NAME?	down	0.0024	0.0139126	XLOC_047223
TCONS_00044903	-	chr13:76312101-76312357	8.29193	0	#NAME?	down	0.0024	0.0139126	XLOC_029814
TCONS_00174640	-	chrX:3348218-3348474	8.29193	0	#NAME?	down	0.0024	0.0139126	XLOC_116322
TCONS_00019611	-	chr10:778511-778767	8.29193	0	#NAME?	down	0.0024	0.0139126	XLOC_012751
TCONS_00136330	-	chr5:145223263-145223519	8.29193	0	#NAME?	down	0.0024	0.0139126	XLOC_090269
TCONS_00168429	-	chr9:80199424-80199693	8.28187	0	#NAME?	down	0.00255	0.0139126	XLOC_112043
TCONS_00092840	-	chr2:54315029-54315298	8.28187	0	#NAME?	down	0.00255	0.0139126	XLOC_059531
TCONS_00068218	-	chr17:7714649-7714918	8.28187	0	#NAME?	down	0.00255	0.0139126	XLOC_044970
TCONS_00091942	-	chr2:19173543-19173819	8.28172	0	#NAME?	down	0.0016	0.0139126	XLOC_058921
TCONS_00002940	-	chr1:68237117-68237393	8.28172	0	#NAME?	down	0.0016	0.0139126	XLOC_001823
TCONS_00051338	-	chr14:95047073-95047339	8.27839	0	#NAME?	down	0.0022	0.0139126	XLOC_034374
TCONS_00046596	-	chr14:41920658-41920924	8.27839	0	#NAME?	down	0.0022	0.0139126	XLOC_031106
TCONS_00030535	-	chr11:74443811-74444077	8.27839	0	#NAME?	down	0.0022	0.0139126	XLOC_019910
TCONS_00174313	-	chr9:37094974-37095243	8.27418	0	#NAME?	down	0.00225	0.0139126	XLOC_116081
TCONS_00101841	-	chr20:53605312-53605595	8.26456	0	#NAME?	down	5e-05	0.00109431	XLOC_065730
TCONS_00046966	-	chr14:53685504-53685767	8.25419	0	#NAME?	down	0.00165	0.0139126	XLOC_031416
TCONS_00098550	-	chr20:12211853-12212116	8.25419	0	#NAME?	down	0.00165	0.0139126	XLOC_063664
TCONS_00159828	-	chr8:9058679-9058942	8.25419	0	#NAME?	down	0.00165	0.0139126	XLOC_105855
TCONS_00157678	-	chr7:97016352-97016634	8.23863	0	#NAME?	down	0.00245	0.0139126	XLOC_104368
TCONS_00067154	-	chr17:74362518-74362775	8.22174	0	#NAME?	down	0.0025	0.0139126	XLOC_044426
TCONS_00042614	-	chr13:71873979-71874236	8.22174	0	#NAME?	down	0.0025	0.0139126	XLOC_028092
TCONS_00115283	-	chr3:43640477-43640734	8.22174	0	#NAME?	down	0.0025	0.0139126	XLOC_075095
TCONS_00024863	-	chr11:57638371-57638677	8.21623	0	#NAME?	down	5e-05	0.00109431	XLOC_016275
TCONS_00026738	-	chr11:95303519-95303797	8.20953	0	#NAME?	down	0.0017	0.0139126	XLOC_017493
TCONS_00030405	-	chr11:72177382-72177643	8.20196	0	#NAME?	down	0.0028	0.0139126	XLOC_019829
TCONS_00172602	-	chr9:97132941-97133201	8.19429	0	#NAME?	down	0.0027	0.0139126	XLOC_114935
TCONS_00022093	-	chr10:100130448-100130708	8.19429	0	#NAME?	down	0.0027	0.0139126	XLOC_014375
TCONS_00094812	-	chr2:119744576-119744836	8.19429	0	#NAME?	down	0.0027	0.0139126	XLOC_060980
TCONS_00166138	-	chr8:134439342-134439602	8.19429	0	#NAME?	down	0.0027	0.0139126	XLOC_110428
TCONS_00005569	-	chr1:166177914-166178174	8.19429	0	#NAME?	down	0.0027	0.0139126	XLOC_003474
TCONS_00134484	-	chr5:77682995-77683269	8.18642	0	#NAME?	down	0.0016	0.0139126	XLOC_088934
TCONS_00174317	-	chr9:85805183-85805457	8.16877	0	#NAME?	down	0.0022	0.0139126	XLOC_116085
TCONS_00091273	-	chr2:237436625-237436908	8.14507	0	#NAME?	down	0.0022	0.0139126	XLOC_058513
TCONS_00010055	-	chr1:47655091-47655377	8.13535	0	#NAME?	down	0.002	0.0139126	XLOC_006277
TCONS_00097554	-	chr2:229310321-229310607	8.13535	0	#NAME?	down	0.002	0.0139126	XLOC_062928
TCONS_00020651	-	chr10:44360849-44361127	8.10254	0	#NAME?	down	5e-05	0.00109431	XLOC_013413
TCONS_00173179	-	chr9:111262895-111263173	8.10254	0	#NAME?	down	5e-05	0.00109431	XLOC_115436
TCONS_00142673	-	chr6:7690931-7691201	8.08798	0	#NAME?	down	0.00225	0.0139126	XLOC_094678
TCONS_00159608	-	chr8:2206741-2206998	8.08763	0	#NAME?	down	0.0024	0.0139126	XLOC_105660
TCONS_00073080	-	chr18:69273237-69273494	8.08763	0	#NAME?	down	0.0024	0.0139126	XLOC_047859
TCONS_00179407	-	chrX:55480898-55481155	8.08763	0	#NAME?	down	0.0024	0.0139126	XLOC_119587
TCONS_00008230	-	chr1:1907423-1907680	8.08763	0	#NAME?	down	0.0024	0.0139126	XLOC_005228
TCONS_00074186	-	chr18:48897477-48897734	8.08763	0	#NAME?	down	0.0024	0.0139126	XLOC_048638
TCONS_00037910	-	chr12:12310303-12310560	8.08763	0	#NAME?	down	0.0024	0.0139126	XLOC_024939
TCONS_00141110	-	chr6:126665456-126665713	8.08763	0	#NAME?	down	0.0024	0.0139126	XLOC_093522
TCONS_00182016	-	chrY:16599909-16600176	8.08723	0	#NAME?	down	0.0022	0.0139126	XLOC_121324
TCONS_00136730	-	chr5:156802986-156803253	8.08723	0	#NAME?	down	0.0022	0.0139126	XLOC_090539
TCONS_00102467	-	chr21:27165676-27165943	8.08723	0	#NAME?	down	0.0022	0.0139126	XLOC_066158
TCONS_00112941	-	chr3:164658222-164658494	8.0849	0	#NAME?	down	0.00215	0.0139126	XLOC_073331
TCONS_00068007	-	chr17:4924628-4924917	8.07742	0	#NAME?	down	0.0002	0.00360609	XLOC_044876
TCONS_00133496	-	chr5:31179907-31180196	8.07742	0	#NAME?	down	0.0002	0.00360609	XLOC_088261
TCONS_00179365	-	chrX:54439970-54440231	8.07599	0	#NAME?	down	0.00265	0.0139126	XLOC_119570
TCONS_00023815	-	chr11:15361996-15362270	8.06381	0	#NAME?	down	0.00225	0.0139126	XLOC_015497
TCONS_00152430	-	chr7:72844659-72844923	8.0591	0	#NAME?	down	0.00165	0.0139126	XLOC_100746
TCONS_00155458	-	chr7:17258656-17258920	8.0591	0	#NAME?	down	0.00165	0.0139126	XLOC_102761
TCONS_00048459	-	chr14:97881784-97882053	8.03176	0	#NAME?	down	0.00185	0.0139126	XLOC_032480
TCONS_00135574	-	chr5:121104453-121104711	8.02142	0	#NAME?	down	0.0025	0.0139126	XLOC_089799
TCONS_00036838	-	chr12:116441587-116441845	8.02142	0	#NAME?	down	0.0025	0.0139126	XLOC_024338
TCONS_00160547	-	chr8:33922381-33922639	8.02142	0	#NAME?	down	0.0025	0.0139126	XLOC_106320
TCONS_00134458	-	chr5:75319963-75320221	8.02142	0	#NAME?	down	0.0025	0.0139126	XLOC_088920
TCONS_00103707	-	chr21:28353084-28353358	8.01131	0	#NAME?	down	0.0026	0.0139126	XLOC_067062
TCONS_00090667	-	chr2:217096254-217096515	7.99675	0	#NAME?	down	0.0027	0.0139126	XLOC_058119
TCONS_00151178	-	chr7:26380687-26380948	7.99675	0	#NAME?	down	0.0027	0.0139126	XLOC_099876
TCONS_00051976	-	chr15:22292864-22293132	7.96972	0	#NAME?	down	0.0022	0.0139126	XLOC_034797
TCONS_00135193	-	chr5:107243483-107243769	7.95729	0	#NAME?	down	5e-05	0.00109431	XLOC_089484
TCONS_00098111	-	chr20:921166-921447	7.95049	0	#NAME?	down	0.0021	0.0139126	XLOC_063350
TCONS_00021491	-	chr10:78903912-78904188	7.93308	0	#NAME?	down	0.00285	0.0140291	XLOC_013969
TCONS_00145918	-	chr6:118401765-118402041	7.93308	0	#NAME?	down	0.00285	0.0140291	XLOC_096870
TCONS_00093053	-	chr2:57642479-57642751	7.91666	0	#NAME?	down	0.0024	0.0139126	XLOC_059726
TCONS_00176298	-	chrX:68879155-68879428	7.90746	0	#NAME?	down	0.00215	0.0139126	XLOC_117546
TCONS_00017448	-	chr10:64110743-64111014	7.90727	0	#NAME?	down	0.00225	0.0139126	XLOC_011316
TCONS_00027036	-	chr11:109326949-109327220	7.90727	0	#NAME?	down	0.00225	0.0139126	XLOC_017733
TCONS_00135447	-	chr5:115691863-115692145	7.90688	0	#NAME?	down	5e-05	0.00109431	XLOC_089686
TCONS_00035302	-	chr12:67413933-67414201	7.90202	0	#NAME?	down	0.0022	0.0139126	XLOC_023147
TCONS_00048839	-	chr14:103382422-103382690	7.90202	0	#NAME?	down	0.0022	0.0139126	XLOC_032716
TCONS_00123505	-	chr4:166353910-166354178	7.90202	0	#NAME?	down	0.0022	0.0139126	XLOC_080922
TCONS_00123555	-	chr4:173495199-173495457	7.88959	0	#NAME?	down	0.0024	0.0139126	XLOC_080957
TCONS_00036670	-	chr12:109836997-109837255	7.88959	0	#NAME?	down	0.0024	0.0139126	XLOC_024231
TCONS_00057289	-	chr15:87826737-87827008	7.88851	0	#NAME?	down	0.00255	0.0139126	XLOC_038388
TCONS_00042598	-	chr13:60607271-60607542	7.88851	0	#NAME?	down	0.00255	0.0139126	XLOC_028076
TCONS_00020055	-	chr10:20608028-20608299	7.88851	0	#NAME?	down	0.00255	0.0139126	XLOC_013026
TCONS_00116409	-	chr3:72590530-72590801	7.88851	0	#NAME?	down	0.00255	0.0139126	XLOC_075783
TCONS_00154294	-	chr7:136495429-136495700	7.88851	0	#NAME?	down	0.00255	0.0139126	XLOC_102000
TCONS_00142870	-	chr6:19438945-19439216	7.88851	0	#NAME?	down	0.00255	0.0139126	XLOC_094795
TCONS_00166027	-	chr8:129343876-129344173	7.88292	0	#NAME?	down	0.00015	0.00279523	XLOC_110353
TCONS_00009239	-	chr1:31255101-31255366	7.8702	0	#NAME?	down	0.00165	0.0139126	XLOC_005796
TCONS_00158574	-	chr7:130388209-130388474	7.8702	0	#NAME?	down	0.00165	0.0139126	XLOC_104937
TCONS_00141940	-	chr6:157238528-157238793	7.8702	0	#NAME?	down	0.00165	0.0139126	XLOC_094120
TCONS_00150980	-	chr7:19401347-19401628	7.85757	0	#NAME?	down	0.0021	0.0139126	XLOC_099741
TCONS_00159149	-	chr7:149972985-149973244	7.82745	0	#NAME?	down	0.0025	0.0139126	XLOC_105333
TCONS_00124797	-	chr4:17416333-17416592	7.82745	0	#NAME?	down	0.0025	0.0139126	XLOC_081932
TCONS_00034320	-	chr12:43829577-43829852	7.82525	0	#NAME?	down	0.0026	0.0139126	XLOC_022521
TCONS_00037184	-	chr12:128998644-128998907	7.81721	0	#NAME?	down	0.0028	0.0139126	XLOC_024518
TCONS_00051134	-	chr14:90372680-90372943	7.81721	0	#NAME?	down	0.0028	0.0139126	XLOC_034275
TCONS_00113601	-	chr3:189449076-189449339	7.81721	0	#NAME?	down	0.0028	0.0139126	XLOC_073813
TCONS_00173696	-	chr9:127409985-127410247	7.8053	0	#NAME?	down	0.0027	0.0139126	XLOC_115779
TCONS_00040621	-	chr12:106000534-106000822	7.79422	0	#NAME?	down	0.002	0.0139126	XLOC_026766
TCONS_00104655	-	chr21:37040922-37041197	7.77575	0	#NAME?	down	0.00295	0.0144419	XLOC_067744
TCONS_00042955	-	chr13:80908495-80908777	7.77352	0	#NAME?	down	0.0021	0.0139126	XLOC_028394
TCONS_00146562	-	chr6:141560881-141561158	7.76251	0	#NAME?	down	0.00285	0.0140291	XLOC_097330
TCONS_00029122	-	chr11:30223150-30223427	7.76251	0	#NAME?	down	0.00285	0.0140291	XLOC_019096
TCONS_00124976	-	chr4:25096115-25096392	7.76251	0	#NAME?	down	0.00285	0.0140291	XLOC_082077
TCONS_00106664	-	chr22:25321430-25321713	7.7443	0	#NAME?	down	5e-05	0.00109431	XLOC_068910
TCONS_00076371	-	chr19:31420834-31421108	7.73512	0	#NAME?	down	0.00215	0.0139126	XLOC_049977
TCONS_00175527	-	chrX:48611040-48611312	7.73202	0	#NAME?	down	0.00225	0.0139126	XLOC_116943
TCONS_00050817	-	chr14:76546778-76547050	7.73202	0	#NAME?	down	0.00225	0.0139126	XLOC_034040
TCONS_00014591	-	chr1:209112551-209112830	7.72696	0	#NAME?	down	0.0016	0.0139126	XLOC_009218
TCONS_00114781	-	chr3:21862768-21863047	7.72696	0	#NAME?	down	0.0016	0.0139126	XLOC_074725
TCONS_00006561	-	chr1:203115101-203115380	7.72696	0	#NAME?	down	0.0016	0.0139126	XLOC_004170
TCONS_00122555	-	chr4:123509454-123509723	7.72257	0	#NAME?	down	0.0022	0.0139126	XLOC_080228
TCONS_00097755	-	chr2:236958128-236958397	7.72257	0	#NAME?	down	0.0022	0.0139126	XLOC_063079
TCONS_00157747	-	chr7:99367207-99367476	7.72257	0	#NAME?	down	0.0022	0.0139126	XLOC_104416
TCONS_00130350	-	chr5:82694496-82694771	7.71756	0	#NAME?	down	0.00205	0.0139126	XLOC_086047
TCONS_00134278	-	chr5:67980503-67980791	7.71591	0	#NAME?	down	5e-05	0.00109431	XLOC_088807
TCONS_00156490	-	chr7:46859325-46859597	7.70125	0	#NAME?	down	0.00255	0.0139126	XLOC_103492
TCONS_00043724	-	chr13:30141078-30141350	7.70125	0	#NAME?	down	0.00255	0.0139126	XLOC_028932
TCONS_00068949	-	chr17:29309459-29309731	7.70125	0	#NAME?	down	0.00255	0.0139126	XLOC_045434
TCONS_00130673	-	chr5:91586117-91586389	7.70125	0	#NAME?	down	0.00255	0.0139126	XLOC_086342
TCONS_00007016	-	chr1:213330006-213330278	7.70125	0	#NAME?	down	0.00255	0.0139126	XLOC_004415
TCONS_00118497	-	chr3:156633301-156633560	7.69771	0	#NAME?	down	0.0024	0.0139126	XLOC_077347
TCONS_00178619	-	chrX:21225973-21226232	7.69771	0	#NAME?	down	0.0024	0.0139126	XLOC_119060
TCONS_00009013	-	chr1:25124902-25125168	7.68708	0	#NAME?	down	0.00165	0.0139126	XLOC_005659
TCONS_00022577	-	chr10:118667181-118667447	7.68708	0	#NAME?	down	0.00165	0.0139126	XLOC_014670
TCONS_00076355	-	chr19:30067216-30067482	7.68708	0	#NAME?	down	0.00165	0.0139126	XLOC_049962
TCONS_00095354	-	chr2:147132937-147133203	7.68708	0	#NAME?	down	0.00165	0.0139126	XLOC_061365
TCONS_00103677	-	chr21:27519282-27519548	7.68708	0	#NAME?	down	0.00165	0.0139126	XLOC_067033
TCONS_00173437	-	chr9:120292729-120292995	7.68708	0	#NAME?	down	0.00165	0.0139126	XLOC_115611
TCONS_00105983	-	chr22:44212662-44212940	7.6807	0	#NAME?	down	0.00245	0.0139126	XLOC_068513
TCONS_00153003	-	chr7:88453060-88453331	7.67695	0	#NAME?	down	0.00185	0.0139126	XLOC_101162
TCONS_00126235	-	chr4:97279224-97279495	7.67695	0	#NAME?	down	0.00185	0.0139126	XLOC_082955
TCONS_00093525	-	chr2:68081029-68081305	7.64466	0	#NAME?	down	0.0026	0.0139126	XLOC_060148
TCONS_00011149	-	chr1:89743008-89743268	7.63923	0	#NAME?	down	0.0025	0.0139126	XLOC_007070
TCONS_00046089	-	chr14:26842797-26843057	7.63923	0	#NAME?	down	0.0025	0.0139126	XLOC_030673
TCONS_00040249	-	chr12:92967552-92967812	7.63923	0	#NAME?	down	0.0025	0.0139126	XLOC_026498
TCONS_00088303	-	chr2:128323338-128323598	7.63923	0	#NAME?	down	0.0025	0.0139126	XLOC_056375
TCONS_00153106	-	chr7:91277525-91277799	7.63391	0	#NAME?	down	0.0013	0.0139126	XLOC_101239
TCONS_00097367	-	chr2:224275131-224275395	7.63347	0	#NAME?	down	0.0028	0.0139126	XLOC_062766
TCONS_00121751	-	chr4:85338501-85338765	7.63347	0	#NAME?	down	0.0028	0.0139126	XLOC_079632
TCONS_00159214	-	chr7:150187177-150187441	7.63347	0	#NAME?	down	0.0028	0.0139126	XLOC_105398
TCONS_00097008	-	chr2:212854142-212854406	7.63347	0	#NAME?	down	0.0028	0.0139126	XLOC_062541
TCONS_00160501	-	chr8:32956252-32956574	7.62477	0	#NAME?	down	5e-05	0.00109431	XLOC_106274
TCONS_00038475	-	chr12:45141463-45141726	7.61925	0	#NAME?	down	0.0027	0.0139126	XLOC_025305
TCONS_00059147	-	chr16:27369526-27369789	7.61925	0	#NAME?	down	0.0027	0.0139126	XLOC_039463
TCONS_00131425	-	chr5:128963598-128963861	7.61925	0	#NAME?	down	0.0027	0.0139126	XLOC_086910
TCONS_00088903	-	chr2:164981120-164981403	7.60207	0	#NAME?	down	0.0021	0.0139126	XLOC_056809
TCONS_00042742	-	chr13:80133213-80133516	7.60196	0	#NAME?	down	5e-05	0.00109431	XLOC_028189
TCONS_00141353	-	chr6:139046407-139046675	7.58548	0	#NAME?	down	0.0016	0.0139126	XLOC_093689
TCONS_00168728	-	chr9:93686511-93686779	7.58548	0	#NAME?	down	0.0016	0.0139126	XLOC_112253
TCONS_00007782	-	chr1:239570444-239570712	7.58548	0	#NAME?	down	0.0016	0.0139126	XLOC_004943
TCONS_00063560	-	chr16:74858949-74859217	7.58548	0	#NAME?	down	0.0016	0.0139126	XLOC_042215
TCONS_00168787	-	chr9:94483773-94484041	7.58548	0	#NAME?	down	0.0016	0.0139126	XLOC_112294
TCONS_00057851	-	chr15:44709633-44709915	7.58536	0	#NAME?	down	0.0015	0.0139126	XLOC_038752
TCONS_00050964	-	chr14:80135229-80135505	7.57403	0	#NAME?	down	0.0019	0.0139126	XLOC_034165
TCONS_00132432	-	chr5:156236155-156236430	7.56748	0	#NAME?	down	0.00215	0.0139126	XLOC_087542
TCONS_00099211	-	chr20:37875098-37875387	7.56652	0	#NAME?	down	5e-05	0.00109431	XLOC_064118
TCONS_00169260	-	chr9:109627279-109627552	7.56164	0	#NAME?	down	0.00225	0.0139126	XLOC_112650
TCONS_00096193	-	chr2:184594033-184594331	7.55875	0	#NAME?	down	0.0001	0.00197988	XLOC_061915
TCONS_00119183	-	chr3:187835626-187835902	7.55048	0	#NAME?	down	0.00205	0.0139126	XLOC_077788
TCONS_00015749	-	chr1:78402680-78402956	7.55048	0	#NAME?	down	0.00205	0.0139126	XLOC_010055
TCONS_00161343	-	chr8:74107333-74107603	7.54879	0	#NAME?	down	0.0022	0.0139126	XLOC_106901
TCONS_00080279	-	chr19:28916436-28916737	7.52963	0	#NAME?	down	5e-05	0.00109431	XLOC_052107
TCONS_00178245	-	chrX:6963642-6963902	7.51143	0	#NAME?	down	0.0024	0.0139126	XLOC_118807
TCONS_00006692	-	chr1:205633248-205633508	7.51143	0	#NAME?	down	0.0024	0.0139126	XLOC_004248
TCONS_00070220	-	chr17:50943901-50944168	7.50957	0	#NAME?	down	0.00165	0.0139126	XLOC_046191
TCONS_00045787	-	chr14:21513809-21514076	7.50957	0	#NAME?	down	0.00165	0.0139126	XLOC_030520
TCONS_00069357	-	chr17:39245086-39245353	7.50957	0	#NAME?	down	0.00165	0.0139126	XLOC_045673
TCONS_00047120	-	chr14:56674705-56674972	7.50957	0	#NAME?	down	0.00165	0.0139126	XLOC_031529
TCONS_00100486	-	chr20:4652315-4652582	7.50957	0	#NAME?	down	0.00165	0.0139126	XLOC_064886
TCONS_00045448	-	chr13:109476891-109477163	7.50741	0	#NAME?	down	0.00185	0.0139126	XLOC_030263
TCONS_00068943	-	chr17:29241447-29241720	7.46143	0	#NAME?	down	0.00215	0.0139126	XLOC_045428
TCONS_00010073	-	chr1:48208849-48209110	7.45633	0	#NAME?	down	0.0025	0.0139126	XLOC_006293
TCONS_00092497	-	chr2:42040979-42041240	7.45633	0	#NAME?	down	0.0025	0.0139126	XLOC_059262
TCONS_00130391	-	chr5:82887492-82887753	7.45633	0	#NAME?	down	0.0025	0.0139126	XLOC_086088
TCONS_00038068	-	chr12:22172184-22172449	7.45545	0	#NAME?	down	0.0028	0.0139126	XLOC_025039
TCONS_00163900	-	chr8:37534101-37534366	7.45545	0	#NAME?	down	0.0028	0.0139126	XLOC_108828
TCONS_00156747	-	chr7:66477831-66478096	7.45545	0	#NAME?	down	0.0028	0.0139126	XLOC_103677
TCONS_00057184	-	chr15:82968728-82968996	7.45009	0	#NAME?	down	0.002	0.0139126	XLOC_038322
TCONS_00074533	-	chr18:61784204-61784468	7.43917	0	#NAME?	down	0.0027	0.0139126	XLOC_048894
TCONS_00128916	-	chr5:16007546-16007810	7.43917	0	#NAME?	down	0.0027	0.0139126	XLOC_085030
TCONS_00172732	-	chr9:104212974-104213238	7.43917	0	#NAME?	down	0.0027	0.0139126	XLOC_115020
TCONS_00146105	-	chr6:126924555-126924819	7.43917	0	#NAME?	down	0.0027	0.0139126	XLOC_097015
TCONS_00142903	-	chr6:19723343-19723627	7.4359	0	#NAME?	down	0.0021	0.0139126	XLOC_094828
TCONS_00056230	-	chr15:61698004-61698283	7.43442	0	#NAME?	down	0.00285	0.0140291	XLOC_037733
TCONS_00025433	-	chr11:65911897-65912166	7.41394	0	#NAME?	down	0.0016	0.0139126	XLOC_016568
TCONS_00139658	-	chr6:58104823-58105092	7.41394	0	#NAME?	down	0.0016	0.0139126	XLOC_092379
TCONS_00150786	-	chr7:12719249-12719518	7.41394	0	#NAME?	down	0.0016	0.0139126	XLOC_099567
TCONS_00022345	-	chr10:111851906-111852175	7.41394	0	#NAME?	down	0.0016	0.0139126	XLOC_014504
TCONS_00114099	-	chr3:4091618-4091879	7.40959	0	#NAME?	down	0.0029	0.0142149	XLOC_074211
TCONS_00070081	-	chr17:48644382-48644658	7.4042	0	#NAME?	down	0.00215	0.0139126	XLOC_046100
TCONS_00176284	-	chrX:68732353-68732629	7.4042	0	#NAME?	down	0.00215	0.0139126	XLOC_117532
TCONS_00086413	-	chr2:64020406-64020682	7.4042	0	#NAME?	down	0.00215	0.0139126	XLOC_055041
TCONS_00005565	-	chr1:166171431-166171709	7.4027	0	#NAME?	down	0.0017	0.0139126	XLOC_003470
TCONS_00093891	-	chr2:85490877-85491151	7.3962	0	#NAME?	down	0.00225	0.0139126	XLOC_060369
TCONS_00120756	-	chr4:41976600-41976874	7.3962	0	#NAME?	down	0.00225	0.0139126	XLOC_078863
TCONS_00003004	-	chr1:71305836-71306113	7.38756	0	#NAME?	down	0.00205	0.0139126	XLOC_001872
TCONS_00168253	-	chr9:75578744-75579025	7.3826	0	#NAME?	down	0.0016	0.0139126	XLOC_111909
TCONS_00091763	-	chr2:10555313-10555584	7.38012	0	#NAME?	down	0.0022	0.0139126	XLOC_058788
TCONS_00001023	-	chr1:22549565-22549836	7.38012	0	#NAME?	down	0.0022	0.0139126	XLOC_000634
TCONS_00162515	-	chr8:124997393-124997664	7.38012	0	#NAME?	down	0.0022	0.0139126	XLOC_107835
TCONS_00118816	-	chr3:178260983-178261254	7.38012	0	#NAME?	down	0.0022	0.0139126	XLOC_077549
TCONS_00120806	-	chr4:44761196-44761467	7.38012	0	#NAME?	down	0.0022	0.0139126	XLOC_078910
TCONS_00169459	-	chr9:114660012-114660281	7.37224	0	#NAME?	down	0.002	0.0139126	XLOC_112785
TCONS_00104591	-	chr21:45351005-45351279	7.3437	0	#NAME?	down	0.00255	0.0139126	XLOC_067700
TCONS_00009737	-	chr1:40779789-40780062	7.34264	0	#NAME?	down	0.00185	0.0139126	XLOC_006115
TCONS_00131570	-	chr5:133125078-133125346	7.33759	0	#NAME?	down	0.00165	0.0139126	XLOC_087031
TCONS_00038514	-	chr12:45728993-45729261	7.33759	0	#NAME?	down	0.00165	0.0139126	XLOC_025343
TCONS_00018577	-	chr10:99460633-99460901	7.33759	0	#NAME?	down	0.00165	0.0139126	XLOC_012047
TCONS_00050398	-	chr14:65276753-65277014	7.33035	0	#NAME?	down	0.0024	0.0139126	XLOC_033734
TCONS_00091220	-	chr2:236134923-236135184	7.33035	0	#NAME?	down	0.0024	0.0139126	XLOC_058462
TCONS_00089379	-	chr2:175682751-175683039	7.30708	0	#NAME?	down	0.0022	0.0139126	XLOC_057175
TCONS_00153245	-	chr7:97096222-97096507	7.30474	0	#NAME?	down	0.00115	0.0139126	XLOC_101336
TCONS_00097825	-	chr2:237429643-237429921	7.29852	0	#NAME?	down	0.0026	0.0139126	XLOC_063144
TCONS_00134508	-	chr5:78758127-78758413	7.28513	0	#NAME?	down	5e-05	0.00109431	XLOC_088952
TCONS_00096464	-	chr2:190326862-190327128	7.28288	0	#NAME?	down	0.0028	0.0139126	XLOC_062146
TCONS_00049682	-	chr14:38243481-38243747	7.28288	0	#NAME?	down	0.0028	0.0139126	XLOC_033231
TCONS_00045256	-	chr13:97823345-97823611	7.28288	0	#NAME?	down	0.0028	0.0139126	XLOC_030116
TCONS_00135883	-	chr5:133906684-133906950	7.28288	0	#NAME?	down	0.0028	0.0139126	XLOC_089997
TCONS_00038468	-	chr12:44928832-44929094	7.27899	0	#NAME?	down	0.0025	0.0139126	XLOC_025298
TCONS_00122983	-	chr4:143746866-143747128	7.27899	0	#NAME?	down	0.0025	0.0139126	XLOC_080559
TCONS_00015397	-	chr1:234921232-234921494	7.27899	0	#NAME?	down	0.0025	0.0139126	XLOC_009804
TCONS_00175776	-	chrX:54637307-54637569	7.27899	0	#NAME?	down	0.0025	0.0139126	XLOC_117082
TCONS_00168380	-	chr9:78556710-78556972	7.27899	0	#NAME?	down	0.0025	0.0139126	XLOC_112002
TCONS_00172773	-	chr9:105040737-105040999	7.27899	0	#NAME?	down	0.0025	0.0139126	XLOC_115061
TCONS_00125419	-	chr4:67422505-67422767	7.27899	0	#NAME?	down	0.0025	0.0139126	XLOC_082362
TCONS_00155882	-	chr7:29562447-29562732	7.27475	0	#NAME?	down	0.0021	0.0139126	XLOC_103094
TCONS_00154464	-	chr7:142352830-142353241	7.2648	0	#NAME?	down	0.0027	0.0139126	XLOC_102108
TCONS_00163904	-	chr8:37611170-37611435	7.2648	0	#NAME?	down	0.0027	0.0139126	XLOC_108832
TCONS_00003079	-	chr1:72580589-72580854	7.2648	0	#NAME?	down	0.0027	0.0139126	XLOC_001945
TCONS_00160541	-	chr8:33865741-33866006	7.2648	0	#NAME?	down	0.0027	0.0139126	XLOC_106314
TCONS_00175031	-	chrX:18675986-18676272	7.26388	0	#NAME?	down	5e-05	0.00109431	XLOC_116618
TCONS_00018576	-	chr10:99449543-99449813	7.24774	0	#NAME?	down	0.0016	0.0139126	XLOC_012046
TCONS_00122067	-	chr4:104975176-104975446	7.24774	0	#NAME?	down	0.0016	0.0139126	XLOC_079849
TCONS_00090822	-	chr2:219709760-219710035	7.23521	0	#NAME?	down	0.00225	0.0139126	XLOC_058199
TCONS_00055096	-	chr15:31296994-31297269	7.23521	0	#NAME?	down	0.00225	0.0139126	XLOC_036945
TCONS_00138019	-	chr6:13509491-13509769	7.22889	0	#NAME?	down	0.00205	0.0139126	XLOC_091418
TCONS_00178741	-	chrX:33587011-33587289	7.22889	0	#NAME?	down	0.00205	0.0139126	XLOC_119143
TCONS_00105041	-	chr22:23338248-23338520	7.21655	0	#NAME?	down	0.0022	0.0139126	XLOC_067962
TCONS_00159549	-	chr8:1161212-1161486	7.18261	0	#NAME?	down	0.00185	0.0139126	XLOC_105615
TCONS_00019459	-	chr10:130231616-130231890	7.18261	0	#NAME?	down	0.00185	0.0139126	XLOC_012647
TCONS_00019065	-	chr10:113926240-113926514	7.18261	0	#NAME?	down	0.00185	0.0139126	XLOC_012369
TCONS_00033474	-	chr12:13256731-13257005	7.18261	0	#NAME?	down	0.00185	0.0139126	XLOC_021901
TCONS_00122742	-	chr4:128650148-128650423	7.17315	0	#NAME?	down	0.00255	0.0139126	XLOC_080377
TCONS_00122358	-	chr4:119337444-119337719	7.17315	0	#NAME?	down	0.00255	0.0139126	XLOC_080060
TCONS_00084720	-	chr2:340085-340360	7.17315	0	#NAME?	down	0.00255	0.0139126	XLOC_053808
TCONS_00140559	-	chr6:114361437-114361712	7.17315	0	#NAME?	down	0.00255	0.0139126	XLOC_093050
TCONS_00059133	-	chr16:25324219-25324494	7.17315	0	#NAME?	down	0.00255	0.0139126	XLOC_039454
TCONS_00173963	-	chr9:132579541-132579833	7.1711	0	#NAME?	down	0.002	0.0139126	XLOC_115913
TCONS_00133222	-	chr5:6161090-6161359	7.17096	0	#NAME?	down	0.00165	0.0139126	XLOC_088038
TCONS_00170356	-	chr9:134526984-134527253	7.17096	0	#NAME?	down	0.00165	0.0139126	XLOC_113347
TCONS_00072901	-	chr18:58991456-58991725	7.17096	0	#NAME?	down	0.00165	0.0139126	XLOC_047723
TCONS_00143909	-	chr6:39093583-39093852	7.17096	0	#NAME?	down	0.00165	0.0139126	XLOC_095434
TCONS_00170858	-	chr9:14731079-14731348	7.17096	0	#NAME?	down	0.00165	0.0139126	XLOC_113662
TCONS_00144497	-	chr6:55673264-55673533	7.17096	0	#NAME?	down	0.00165	0.0139126	XLOC_095814
TCONS_00120651	-	chr4:39181850-39182119	7.17096	0	#NAME?	down	0.00165	0.0139126	XLOC_078806
TCONS_00019121	-	chr10:117477575-117477837	7.15486	0	#NAME?	down	0.0024	0.0139126	XLOC_012412
TCONS_00135218	-	chr5:107341269-107341531	7.15486	0	#NAME?	down	0.0024	0.0139126	XLOC_089509
TCONS_00180060	-	chrX:95723429-95723691	7.15486	0	#NAME?	down	0.0024	0.0139126	XLOC_120071
TCONS_00138495	-	chr6:28377040-28377302	7.15486	0	#NAME?	down	0.0024	0.0139126	XLOC_091722
TCONS_00125370	-	chr4:55922477-55922739	7.15486	0	#NAME?	down	0.0024	0.0139126	XLOC_082338
TCONS_00038132	-	chr12:24688325-24688587	7.15486	0	#NAME?	down	0.0024	0.0139126	XLOC_025084
TCONS_00042322	-	chr13:47275288-47275550	7.15486	0	#NAME?	down	0.0024	0.0139126	XLOC_027890
TCONS_00093136	-	chr2:59962091-59962353	7.15486	0	#NAME?	down	0.0024	0.0139126	XLOC_059808
TCONS_00024985	-	chr11:59823464-59823726	7.15486	0	#NAME?	down	0.0024	0.0139126	XLOC_016340
TCONS_00019329	-	chr10:123588210-123588477	7.11558	0	#NAME?	down	0.0028	0.0139126	XLOC_012562
TCONS_00126523	-	chr4:107538604-107538871	7.11558	0	#NAME?	down	0.0028	0.0139126	XLOC_083152
TCONS_00052651	-	chr15:39138914-39139177	7.10655	0	#NAME?	down	0.0025	0.0139126	XLOC_035305
TCONS_00018131	-	chr10:88115955-88116218	7.10655	0	#NAME?	down	0.0025	0.0139126	XLOC_011745
TCONS_00170926	-	chr9:20623167-20623430	7.10655	0	#NAME?	down	0.0025	0.0139126	XLOC_113699
TCONS_00123501	-	chr4:166118141-166118404	7.10655	0	#NAME?	down	0.0025	0.0139126	XLOC_080918
TCONS_00131115	-	chr5:115941282-115941545	7.10655	0	#NAME?	down	0.0025	0.0139126	XLOC_086694
TCONS_00073621	-	chr18:14024612-14024875	7.10655	0	#NAME?	down	0.0025	0.0139126	XLOC_048239
TCONS_00055411	-	chr15:39357022-39357285	7.10655	0	#NAME?	down	0.0025	0.0139126	XLOC_037200
TCONS_00013943	-	chr1:182767417-182767683	7.09577	0	#NAME?	down	0.0027	0.0139126	XLOC_008785
TCONS_00168461	-	chr9:80562218-80562484	7.09577	0	#NAME?	down	0.0027	0.0139126	XLOC_112075
TCONS_00142976	-	chr6:23441562-23441828	7.09577	0	#NAME?	down	0.0027	0.0139126	XLOC_094893
TCONS_00043019	-	chr13:88931985-88932251	7.09577	0	#NAME?	down	0.0027	0.0139126	XLOC_028453
TCONS_00033583	-	chr12:16401352-16401618	7.09577	0	#NAME?	down	0.0027	0.0139126	XLOC_021980
TCONS_00164581	-	chr8:77449138-77449409	7.08642	0	#NAME?	down	0.0016	0.0139126	XLOC_109277
TCONS_00141242	-	chr6:132256005-132256281	7.07858	0	#NAME?	down	0.00225	0.0139126	XLOC_093616
TCONS_00061636	-	chr16:7762056-7762332	7.07858	0	#NAME?	down	0.00225	0.0139126	XLOC_040889
TCONS_00135778	-	chr5:132105736-132106012	7.07858	0	#NAME?	down	0.00225	0.0139126	XLOC_089948
TCONS_00112182	-	chr3:144136481-144136776	7.07838	0	#NAME?	down	0.00015	0.00279523	XLOC_072694
TCONS_00171151	-	chr9:34170839-34171118	7.07475	0	#NAME?	down	0.00205	0.0139126	XLOC_113853
TCONS_00031666	-	chr11:116733007-116733286	7.07475	0	#NAME?	down	0.00205	0.0139126	XLOC_020685
TCONS_00145903	-	chr6:117644586-117644865	7.07475	0	#NAME?	down	0.00205	0.0139126	XLOC_096855
TCONS_00010503	-	chr1:61621539-61621829	7.06806	0	#NAME?	down	0.0001	0.00197988	XLOC_006596
TCONS_00126688	-	chr4:113825078-113825393	7.06438	0	#NAME?	down	5e-05	0.00109431	XLOC_083271
TCONS_00066802	-	chr17:62696568-62696841	7.05753	0	#NAME?	down	0.0022	0.0139126	XLOC_044175
TCONS_00109275	-	chr3:41032160-41032433	7.05753	0	#NAME?	down	0.0022	0.0139126	XLOC_070619
TCONS_00033513	-	chr12:14734136-14734419	7.05621	0	#NAME?	down	0.00135	0.0139126	XLOC_021935
TCONS_00038603	-	chr12:48016225-48016507	7.05381	0	#NAME?	down	0.00245	0.0139126	XLOC_025395
TCONS_00078910	-	chr19:4079938-4080205	7.04637	0	#NAME?	down	0.0025	0.0139126	XLOC_051341
TCONS_00111572	-	chr3:128422689-128422985	7.03194	0	#NAME?	down	0.00275	0.0139126	XLOC_072242
TCONS_00044899	-	chr13:76222892-76223167	7.02695	0	#NAME?	down	0.00185	0.0139126	XLOC_029810
TCONS_00007799	-	chr1:239607732-239608007	7.02695	0	#NAME?	down	0.00185	0.0139126	XLOC_004960
TCONS_00163840	-	chr8:30767026-30767297	7.02303	0	#NAME?	down	0.00215	0.0139126	XLOC_108795
TCONS_00157065	-	chr7:78012069-78012339	7.00959	0	#NAME?	down	0.00165	0.0139126	XLOC_103900
TCONS_00053875	-	chr15:74834397-74834667	7.00959	0	#NAME?	down	0.00165	0.0139126	XLOC_036094
TCONS_00086784	-	chr2:72898940-72899210	7.00959	0	#NAME?	down	0.00165	0.0139126	XLOC_055343
TCONS_00123556	-	chr4:173496073-173496343	7.00959	0	#NAME?	down	0.00165	0.0139126	XLOC_080958
TCONS_00111526	-	chr3:126476439-126476709	7.00959	0	#NAME?	down	0.00165	0.0139126	XLOC_072216
TCONS_00116705	-	chr3:104394799-104395075	7.00761	0	#NAME?	down	0.00255	0.0139126	XLOC_076020
TCONS_00007730	-	chr1:239418773-239419075	7.00666	0	#NAME?	down	0.0001	0.00197988	XLOC_004891
TCONS_00041097	-	chr12:121201991-121202279	7.00141	0	#NAME?	down	5e-05	0.00109431	XLOC_027045
TCONS_00120887	-	chr4:48884042-48884336	7.00082	0	#NAME?	down	0.0001	0.00197988	XLOC_078966
TCONS_00157064	-	chr7:78001810-78002101	6.99491	0	#NAME?	down	0.0001	0.00197988	XLOC_103899
TCONS_00094865	-	chr2:126571946-126572209	6.98432	0	#NAME?	down	0.0024	0.0139126	XLOC_061017
TCONS_00168367	-	chr9:78037909-78038172	6.98432	0	#NAME?	down	0.0024	0.0139126	XLOC_111994
TCONS_00006315	-	chr1:193846578-193846841	6.98432	0	#NAME?	down	0.0024	0.0139126	XLOC_004001
TCONS_00122569	-	chr4:124161912-124162175	6.98432	0	#NAME?	down	0.0024	0.0139126	XLOC_080240
TCONS_00177184	-	chrX:113001861-113002149	6.98106	0	#NAME?	down	5e-05	0.00109431	XLOC_118126
TCONS_00157336	-	chr7:91608336-91608616	6.97113	0	#NAME?	down	0.0026	0.0139126	XLOC_104114
TCONS_00163324	-	chr8:13530497-13530784	6.96689	0	#NAME?	down	0.0021	0.0139126	XLOC_108424
TCONS_00126785	-	chr4:120055270-120055557	6.96689	0	#NAME?	down	0.0021	0.0139126	XLOC_083353
TCONS_00042949	-	chr13:80893988-80894256	6.95336	0	#NAME?	down	0.0028	0.0139126	XLOC_028388
TCONS_00027566	-	chr11:121684959-121685255	6.95075	0	#NAME?	down	0.00015	0.00279523	XLOC_018053
TCONS_00047088	-	chr14:56492492-56492756	6.93952	0	#NAME?	down	0.0025	0.0139126	XLOC_031501
TCONS_00018799	-	chr10:107712400-107712664	6.93952	0	#NAME?	down	0.0025	0.0139126	XLOC_012172
TCONS_00137792	-	chr6:5937916-5938180	6.93952	0	#NAME?	down	0.0025	0.0139126	XLOC_091243
TCONS_00153519	-	chr7:101169672-101169936	6.93952	0	#NAME?	down	0.0025	0.0139126	XLOC_101507
TCONS_00071485	-	chr17:63924795-63925059	6.93952	0	#NAME?	down	0.0025	0.0139126	XLOC_046907
TCONS_00091668	-	chr2:8336417-8336681	6.93952	0	#NAME?	down	0.0025	0.0139126	XLOC_058722
TCONS_00076349	-	chr19:30054909-30055173	6.93952	0	#NAME?	down	0.0025	0.0139126	XLOC_049956
TCONS_00039869	-	chr12:76018529-76018819	6.93524	0	#NAME?	down	0.00245	0.0139126	XLOC_026212
TCONS_00070917	-	chr17:74603523-74603790	6.93192	0	#NAME?	down	0.0027	0.0139126	XLOC_046630
TCONS_00007018	-	chr1:213335143-213335410	6.93192	0	#NAME?	down	0.0027	0.0139126	XLOC_004417
TCONS_00021041	-	chr10:60806081-60806348	6.93192	0	#NAME?	down	0.0027	0.0139126	XLOC_013664
TCONS_00056603	-	chr15:70434745-70435012	6.93192	0	#NAME?	down	0.0027	0.0139126	XLOC_037977
TCONS_00131759	-	chr5:138651092-138651359	6.93192	0	#NAME?	down	0.0027	0.0139126	XLOC_087160
TCONS_00065724	-	chr17:36730682-36730949	6.93192	0	#NAME?	down	0.0027	0.0139126	XLOC_043556
TCONS_00087962	-	chr2:112879742-112880009	6.93192	0	#NAME?	down	0.0027	0.0139126	XLOC_056142
TCONS_00127092	-	chr4:137285830-137286097	6.93192	0	#NAME?	down	0.0027	0.0139126	XLOC_083614
TCONS_00113457	-	chr3:186921712-186921979	6.93192	0	#NAME?	down	0.0027	0.0139126	XLOC_073695
TCONS_00025670	-	chr11:68968794-68969071	6.92584	0	#NAME?	down	0.00225	0.0139126	XLOC_016686
TCONS_00126422	-	chr4:104461536-104461813	6.92584	0	#NAME?	down	0.00225	0.0139126	XLOC_083069
TCONS_00126703	-	chr4:113860555-113860837	6.92556	0	#NAME?	down	0.00145	0.0139126	XLOC_083286
TCONS_00073105	-	chr18:70627875-70628158	6.90876	0	#NAME?	down	0.00245	0.0139126	XLOC_047876
TCONS_00118468	-	chr3:155417628-155417911	6.90876	0	#NAME?	down	0.00245	0.0139126	XLOC_077331
TCONS_00178777	-	chrX:36768671-36768982	6.90595	0	#NAME?	down	0.00015	0.00279523	XLOC_119177
TCONS_00150277	-	chr7:80250-80534	6.90476	0	#NAME?	down	0.0016	0.0139126	XLOC_099218
TCONS_00088085	-	chr2:116245863-116246147	6.90384	0	#NAME?	down	0.0014	0.0139126	XLOC_056223
TCONS_00086240	-	chr2:58431065-58431367	6.88311	0	#NAME?	down	5e-05	0.00109431	XLOC_054902
TCONS_00129646	-	chr5:58507064-58507369	6.88	0	#NAME?	down	5e-05	0.00109431	XLOC_085584
TCONS_00159196	-	chr7:150148529-150148815	6.85659	0	#NAME?	down	5e-05	0.00109431	XLOC_105380
TCONS_00135725	-	chr5:130233278-130233549	6.85297	0	#NAME?	down	0.00165	0.0139126	XLOC_089922
TCONS_00041426	-	chr12:132618459-132618736	6.84675	0	#NAME?	down	0.00255	0.0139126	XLOC_027227
TCONS_00025609	-	chr11:67508762-67509039	6.84675	0	#NAME?	down	0.00255	0.0139126	XLOC_016655
TCONS_00094119	-	chr2:96063791-96064068	6.84675	0	#NAME?	down	0.00255	0.0139126	XLOC_060504
TCONS_00165828	-	chr8:121371359-121371636	6.84675	0	#NAME?	down	0.00255	0.0139126	XLOC_110186
TCONS_00015313	-	chr1:231512369-231512646	6.84675	0	#NAME?	down	0.00255	0.0139126	XLOC_009745
TCONS_00031590	-	chr11:113576387-113576664	6.84675	0	#NAME?	down	0.00255	0.0139126	XLOC_020629
TCONS_00153379	-	chr7:99818335-99818644	6.82086	0	#NAME?	down	5e-05	0.00109431	XLOC_101431
TCONS_00018127	-	chr10:88002832-88003120	6.81994	0	#NAME?	down	0.0021	0.0139126	XLOC_011741
TCONS_00042572	-	chr13:57733494-57733782	6.81994	0	#NAME?	down	0.0021	0.0139126	XLOC_028060
TCONS_00033300	-	chr12:11398414-11398678	6.81924	0	#NAME?	down	0.0024	0.0139126	XLOC_021749
TCONS_00134936	-	chr5:99000301-99000565	6.81924	0	#NAME?	down	0.0024	0.0139126	XLOC_089246
TCONS_00119190	-	chr3:189478095-189478359	6.81924	0	#NAME?	down	0.0024	0.0139126	XLOC_077794
TCONS_00063883	-	chr16:85136447-85136711	6.81924	0	#NAME?	down	0.0024	0.0139126	XLOC_042449
TCONS_00056602	-	chr15:70425557-70425821	6.81924	0	#NAME?	down	0.0024	0.0139126	XLOC_037976
TCONS_00160549	-	chr8:33938982-33939246	6.81924	0	#NAME?	down	0.0024	0.0139126	XLOC_106322
TCONS_00135323	-	chr5:112141522-112141786	6.81924	0	#NAME?	down	0.0024	0.0139126	XLOC_089580
TCONS_00120173	-	chr4:11039625-11039889	6.81924	0	#NAME?	down	0.0024	0.0139126	XLOC_078440
TCONS_00035420	-	chr12:68165674-68165967	6.81606	0	#NAME?	down	0.00185	0.0139126	XLOC_023259
TCONS_00099734	-	chr20:57750123-57750404	6.81471	0	#NAME?	down	0.0026	0.0139126	XLOC_064432
TCONS_00162250	-	chr8:107695272-107695553	6.81471	0	#NAME?	down	0.0026	0.0139126	XLOC_107625
TCONS_00137692	-	chr6:4221033-4221302	6.79611	0	#NAME?	down	0.0028	0.0139126	XLOC_091156
TCONS_00108985	-	chr3:34213647-34213916	6.79611	0	#NAME?	down	0.0028	0.0139126	XLOC_070440
TCONS_00144456	-	chr6:54515719-54516000	6.77964	0	#NAME?	down	0.00205	0.0139126	XLOC_095783
TCONS_00127451	-	chr4:144745723-144745996	6.77782	0	#NAME?	down	0.0016	0.0139126	XLOC_083923
TCONS_00040188	-	chr12:92396690-92396963	6.77782	0	#NAME?	down	0.0016	0.0139126	XLOC_026441
TCONS_00105685	-	chr22:37551918-37552191	6.77782	0	#NAME?	down	0.0016	0.0139126	XLOC_068368
TCONS_00009225	-	chr1:30928342-30928615	6.77782	0	#NAME?	down	0.0016	0.0139126	XLOC_005786
TCONS_00051515	-	chr14:100321807-100322080	6.77782	0	#NAME?	down	0.0016	0.0139126	XLOC_034503
TCONS_00133175	-	chr5:1794281-1794546	6.77769	0	#NAME?	down	0.0025	0.0139126	XLOC_087997
TCONS_00047573	-	chr14:69468911-69469189	6.77709	0	#NAME?	down	0.00225	0.0139126	XLOC_031859
TCONS_00110359	-	chr3:76275283-76275561	6.77709	0	#NAME?	down	0.00225	0.0139126	XLOC_071300
TCONS_00092699	-	chr2:47982395-47982663	6.77316	0	#NAME?	down	0.0027	0.0139126	XLOC_059409
TCONS_00070902	-	chr17:74516945-74517213	6.77316	0	#NAME?	down	0.0027	0.0139126	XLOC_046620
TCONS_00023745	-	chr11:14982090-14982358	6.77316	0	#NAME?	down	0.0027	0.0139126	XLOC_015437
TCONS_00004808	-	chr1:151335131-151335399	6.77316	0	#NAME?	down	0.0027	0.0139126	XLOC_003085
TCONS_00151671	-	chr7:39824200-39824468	6.77316	0	#NAME?	down	0.0027	0.0139126	XLOC_100231
TCONS_00120191	-	chr4:11594043-11594311	6.77316	0	#NAME?	down	0.0027	0.0139126	XLOC_078458
TCONS_00098268	-	chr20:4838334-4838602	6.77316	0	#NAME?	down	0.0027	0.0139126	XLOC_063437
TCONS_00104958	-	chr22:22026049-22026479	6.77052	0	#NAME?	down	5e-05	0.00109431	XLOC_067913
TCONS_00062613	-	chr16:57602070-57602354	6.76808	0	#NAME?	down	0.00245	0.0139126	XLOC_041491
TCONS_00116184	-	chr3:66867276-66867561	6.75512	0	#NAME?	down	0.0016	0.0139126	XLOC_075593
TCONS_00046297	-	chr14:33810584-33810869	6.75512	0	#NAME?	down	0.0016	0.0139126	XLOC_030850
TCONS_00063781	-	chr16:81077430-81077705	6.75286	0	#NAME?	down	0.0022	0.0139126	XLOC_042388
TCONS_00068809	-	chr17:27811184-27811459	6.75286	0	#NAME?	down	0.0022	0.0139126	XLOC_045363
TCONS_00133638	-	chr5:35550784-35551059	6.75286	0	#NAME?	down	0.0022	0.0139126	XLOC_088356
TCONS_00030633	-	chr11:77524036-77524311	6.75286	0	#NAME?	down	0.0022	0.0139126	XLOC_019971
TCONS_00113769	-	chr3:196189623-196189898	6.75286	0	#NAME?	down	0.0022	0.0139126	XLOC_073936
TCONS_00162411	-	chr8:121882536-121882843	6.7313	0	#NAME?	down	5e-05	0.00109431	XLOC_107755
TCONS_00050666	-	chr14:71280708-71281000	6.7229	0	#NAME?	down	0.0022	0.0139126	XLOC_033954
TCONS_00155010	-	chr7:1428202-1428494	6.7229	0	#NAME?	down	0.0022	0.0139126	XLOC_102416
TCONS_00087663	-	chr2:104099267-104099558	6.70153	0	#NAME?	down	0.00145	0.0139126	XLOC_055950
TCONS_00161776	-	chr8:88378830-88379102	6.70108	0	#NAME?	down	0.00165	0.0139126	XLOC_107287
TCONS_00008994	-	chr1:24688863-24689135	6.70108	0	#NAME?	down	0.00165	0.0139126	XLOC_005645
TCONS_00175814	-	chrX:55493782-55494066	6.69401	0	#NAME?	down	0.00285	0.0140291	XLOC_117103
TCONS_00142299	-	chr6:169193375-169193665	6.69279	0	#NAME?	down	0.00115	0.0139126	XLOC_094396
TCONS_00002315	-	chr1:47616709-47616987	6.69031	0	#NAME?	down	0.00255	0.0139126	XLOC_001378
TCONS_00016247	-	chr10:16295976-16296254	6.69031	0	#NAME?	down	0.00255	0.0139126	XLOC_010431
TCONS_00070775	-	chr17:71483951-71484229	6.69031	0	#NAME?	down	0.00255	0.0139126	XLOC_046518
TCONS_00126207	-	chr4:89235835-89236149	6.68979	0	#NAME?	down	5e-05	0.00109431	XLOC_082936
TCONS_00136867	-	chr5:163191895-163192184	6.67742	0	#NAME?	down	0.0021	0.0139126	XLOC_090622
TCONS_00139944	-	chr6:80750326-80750612	6.66782	0	#NAME?	down	0.00215	0.0139126	XLOC_092581
TCONS_00146958	-	chr6:156075821-156076091	6.66591	0	#NAME?	down	0.0025	0.0139126	XLOC_097610
TCONS_00072414	-	chr18:26092434-26092716	6.66302	0	#NAME?	down	0.0026	0.0139126	XLOC_047410
TCONS_00021724	-	chr10:90710361-90710643	6.66302	0	#NAME?	down	0.0026	0.0139126	XLOC_014141
TCONS_00133349	-	chr5:10351322-10351587	6.6594	0	#NAME?	down	0.0024	0.0139126	XLOC_088140
TCONS_00063439	-	chr16:74060480-74060745	6.6594	0	#NAME?	down	0.0024	0.0139126	XLOC_042122
TCONS_00096704	-	chr2:200168151-200168416	6.6594	0	#NAME?	down	0.0024	0.0139126	XLOC_062338
TCONS_00097857	-	chr2:238421541-238422992	6.6594	0	#NAME?	down	0.0024	0.0139126	XLOC_063165
TCONS_00028688	-	chr11:10441972-10442237	6.6594	0	#NAME?	down	0.0024	0.0139126	XLOC_018803
TCONS_00136790	-	chr5:158498493-158498758	6.6594	0	#NAME?	down	0.0024	0.0139126	XLOC_090580
TCONS_00084821	-	chr2:7147238-7147503	6.6594	0	#NAME?	down	0.0024	0.0139126	XLOC_053875
TCONS_00097985	-	chr2:241821025-241821290	6.6594	0	#NAME?	down	0.0024	0.0139126	XLOC_063242
TCONS_00097751	-	chr2:236941967-236942248	6.64957	0	#NAME?	down	0.00215	0.0139126	XLOC_063075
TCONS_00048309	-	chr14:94350752-94351031	6.64704	0	#NAME?	down	0.00225	0.0139126	XLOC_032357
TCONS_00169609	-	chr9:117867718-117867988	6.64376	0	#NAME?	down	0.0028	0.0139126	XLOC_112923
TCONS_00078953	-	chr19:4671573-4671843	6.64376	0	#NAME?	down	0.0028	0.0139126	XLOC_051365
TCONS_00030847	-	chr11:86347121-86347420	6.63434	0	#NAME?	down	0.00275	0.0139126	XLOC_020096
TCONS_00121226	-	chr4:69189807-69190086	6.63258	0	#NAME?	down	0.00225	0.0139126	XLOC_079238
TCONS_00163700	-	chr8:24862223-24862502	6.63258	0	#NAME?	down	0.00225	0.0139126	XLOC_108710
TCONS_00126359	-	chr4:102138229-102138508	6.63258	0	#NAME?	down	0.00225	0.0139126	XLOC_083043
TCONS_00153727	-	chr7:108624052-108624326	6.6301	0	#NAME?	down	0.0016	0.0139126	XLOC_101635
TCONS_00166070	-	chr8:131718515-131718789	6.6301	0	#NAME?	down	0.0016	0.0139126	XLOC_110384
TCONS_00051028	-	chr14:81238781-81239055	6.6301	0	#NAME?	down	0.0016	0.0139126	XLOC_034214
TCONS_00146282	-	chr6:131424954-131425265	6.62661	0	#NAME?	down	5e-05	0.00109431	XLOC_097149
TCONS_00157738	-	chr7:99242715-99243014	6.6251	0	#NAME?	down	0.00125	0.0139126	XLOC_104407
TCONS_00154191	-	chr7:134735137-134735403	6.6208	0	#NAME?	down	0.0025	0.0139126	XLOC_101916
TCONS_00020749	-	chr10:46572737-46573003	6.6208	0	#NAME?	down	0.0025	0.0139126	XLOC_013467
TCONS_00066098	-	chr17:43634662-43634928	6.6208	0	#NAME?	down	0.0025	0.0139126	XLOC_043772
TCONS_00151751	-	chr7:43834772-43835038	6.6208	0	#NAME?	down	0.0025	0.0139126	XLOC_100290
TCONS_00107243	-	chr22:38775075-38775341	6.6208	0	#NAME?	down	0.0025	0.0139126	XLOC_069240
TCONS_00047185	-	chr14:58567915-58568184	6.61934	0	#NAME?	down	0.0027	0.0139126	XLOC_031573
TCONS_00170237	-	chr9:131278136-131278405	6.61934	0	#NAME?	down	0.0027	0.0139126	XLOC_113273
TCONS_00080419	-	chr19:34597091-34597360	6.61934	0	#NAME?	down	0.0027	0.0139126	XLOC_052217
[truncated: 6,507 more rows]

## Sheet: Sheet1
LncRNAID	GeneName	Locus	CTRL_FPKM	FJOA_FPKM	log2(FJOA/CTRL)	up-or-down	p_value	q_value	LncRNAGeneID
TCONS_00138408	-	chr6:27688190-27688522	428.346	201.902	-1.08512	down	5e-05	0.00109431	XLOC_091678
TCONS_00045791	-	chr14:21712360-21712741	104.558	0	#NAME?	down	5e-05	0.00109431	XLOC_030524
TCONS_00151727	-	chr7:42490641-42490926	10.0077	78.2501	2.96698	up	0.00155	0.0139126	XLOC_100277
TCONS_00039035	LOC102724050	chr12:54416397-54418062	5.92021	16.4697	1.47609	up	0.0042	0.0201584	XLOC_025628
TCONS_00067847	MIR22HG	chr17:1711504-1716272	5.81048	13.3801	1.20336	up	5e-05	0.00109431	XLOC_044802
TCONS_00085574	LBH	chr2:30231354-30235671	4.1515	12.8418	1.62914	up	0.0001	0.00197988	XLOC_054429
TCONS_00068424	MIR548H3	chr17:13531692-13595793	5.0025	10.7162	1.09907	up	5e-05	0.00109431	XLOC_045096
TCONS_00018281	HECTD2-AS1	chr10:91415256-91417528	4.52606	9.45345	1.06259	up	0.0014	0.0139126	XLOC_011859
TCONS_00171782	KLF9	chr9:70384597-70408636	2.46936	8.34424	1.75665	up	0.00725	0.0337409	XLOC_114318
TCONS_00112076	ATP1B3	chr3:141879858-141904070	3.33608	8.02224	1.26585	up	0.00275	0.0139126	XLOC_072600
TCONS_00037993	RERG-AS1	chr12:15152468-15155316	3.26009	6.8069	1.06209	up	0.0006	0.0100118	XLOC_024999
TCONS_00138763	-	chr6:31820654-31821480	12.4134	4.87863	-1.34735	down	5e-05	0.00109431	XLOC_091845
TCONS_00116101	-	chr3:64225717-64231641	1.70328	4.67917	1.45794	up	0.0012	0.0139126	XLOC_075526
TCONS_00139418	SUPT3H	chr6:45328971-45332981	8.42578	3.37	-1.32206	down	0.00065	0.0107543	XLOC_092212
TCONS_00087560	IL1RL2	chr2:102188250-102191230	0.563369	2.6828	2.25159	up	0.0016	0.0139126	XLOC_055871
TCONS_00100589	MKKS	chr20:10411936-10434239	0.900211	2.50331	1.4755	up	0.0047	0.0224224	XLOC_064962
TCONS_00139421	SUPT3H	chr6:45348649-45354629	6.10836	2.26495	-1.43131	down	0.0002	0.00360609	XLOC_092215
TCONS_00011275	BCAR3	chr1:93780100-93847231	0.315224	1.25797	1.99665	up	5e-05	0.00109431	XLOC_007147
TCONS_00118253	CPB1	chr3:148802690-148840951	2.60221	0.502345	-2.37299	down	5e-05	0.00109431	XLOC_077152
